# Supplementary material for: Upregulation of Immune Process-Associated Genes in RAW264.7 Macrophage Cells in Response to Burkholderia pseudomallei Infection
Source: Biomed Res Int. 2018 Jun 4;2018:1235097. doi: 10.1155/2018/1235097 (PMC6008862; doi:10.1155/2018/1235097)
Supplement: Supplementary 3 — DEGs in R4 versus R0 comparison. [file 1235097.f3.xlsx]

## Sheet: Sheet1
DEGs in R4 vs R0 comparison
id	R0 fpkm	R4 fpkm	log2(FC)	Pvalue	FDR	Symbol
ENSMUSG00000000056	3.85	0.99	-1.95936	2.64e-18	9.7e-18	Narf
ENSMUSG00000000085	20.2	9.88	-1.03177	3.12e-24	1.35e-23	Scmh1
ENSMUSG00000000148	8.88	4.21	-1.07674	2.58e-16	8.96e-16	Brat1
ENSMUSG00000000167	0.53	2.25	2.08586	0.000275406	0.000534227	Pih1d2
ENSMUSG00000000194	31.23	11.25	-1.47301	1.95e-56	1.65e-55	Gpr107
ENSMUSG00000000275	45	20.25	-1.152	1.11e-70	1.16e-69	Trim25
ENSMUSG00000000282	14.54	4.59	-1.66346	3.73e-70	3.86e-69	Mnt
ENSMUSG00000000295	20.87	46.16	1.14521	2.26e-25	1.01e-24	Hddc2
ENSMUSG00000000317	0.07	0.38	2.44057	0.00258886	0.00462446	Bcl6b
ENSMUSG00000000374	20.19	5.44	-1.89196	1.24e-123	2.42e-122	-
ENSMUSG00000000532	5.13	2.15	-1.25462	3.33e-17	1.19e-16	Acvr1b
ENSMUSG00000000538	10.41	4.94	-1.07539	5.91e-29	2.89e-28	Tom1l2
ENSMUSG00000000552	14.66	4.71	-1.63809	5.73e-36	3.29e-35	Zfp385a
ENSMUSG00000000561	23.74	55.93	1.2363	7.42e-139	1.62e-137	Wdr77
ENSMUSG00000000562	0.42	0.12	-1.80735	0.0074061	0.0126166	Adora3
ENSMUSG00000000631	22.11	7.64	-1.53305	4.7e-116	8.45e-115	Myo18a
ENSMUSG00000000682	132.6	317.73	1.26072	1.26e-109	2.11e-108	Cd52
ENSMUSG00000000686	1.62	0.49	-1.72514	3.53e-06	7.76e-06	Abhd15
ENSMUSG00000000690	2.42	5.22	1.10904	0.000220483	0.000430714	Hoxb6
ENSMUSG00000000693	3.4	1.41	-1.26984	1.21e-06	2.73e-06	Loxl3
ENSMUSG00000000711	35.91	14.79	-1.27976	4.61e-77	5.29e-76	Rab5b
ENSMUSG00000000730	2.62	9.83	1.90762	4.02e-15	1.34e-14	Dnmt3l
ENSMUSG00000000751	118.36	52.58	-1.1706	8.22e-90	1.11e-88	Rpa1
ENSMUSG00000000782	0.46	0.09	-2.35364	0.00756354	0.0128713	Tcf7
ENSMUSG00000000823	8.55	2.5	-1.774	2.3e-28	1.1e-27	Zfp512b
ENSMUSG00000000826	33.46	14.24	-1.23249	3.04e-46	2.18e-45	Dnajc5
ENSMUSG00000000957	0.14	0.76	2.44057	0.00019426	0.000381266	Mmp14
ENSMUSG00000000976	9.83	2.23	-2.14015	2.83e-50	2.18e-49	Heatr6
ENSMUSG00000000982	41.05	508.19	3.62991	0	0	Ccl3
ENSMUSG00000001018	21.68	10.56	-1.03775	1.86e-22	7.68e-22	Snapin
ENSMUSG00000001025	621.79	1629.37	1.38981	0	0	S100a6
ENSMUSG00000001034	13.79	5.65	-1.2873	1.54e-18	5.7e-18	Mapk7
ENSMUSG00000001056	247.88	533.33	1.10539	1.04e-220	4.36e-219	Nhp2
ENSMUSG00000001062	14.26	5.95	-1.26101	4.04e-17	1.44e-16	Vps9d1
ENSMUSG00000001089	11.58	3.42	-1.75957	1.99e-99	3.01e-98	Luzp1
ENSMUSG00000001131	0.09	3.84	5.41504	5.34e-12	1.58e-11	Timp1
ENSMUSG00000001138	9.21	3.12	-1.56166	1.23e-25	5.54e-25	Cnnm3
ENSMUSG00000001150	12.04	3.11	-1.95285	1.33e-99	2.02e-98	Mcm3ap
ENSMUSG00000001151	5.11	0.89	-2.52145	2.09e-88	2.76e-87	Pcnt
ENSMUSG00000001158	35.2	75.08	1.09285	3.33e-37	1.98e-36	Snrnp27
ENSMUSG00000001227	24.23	8.79	-1.46286	2.19e-79	2.58e-78	Sema6b
ENSMUSG00000001228	132.24	22.88	-2.531	0	0	Uhrf1
ENSMUSG00000001229	34.87	14.84	-1.2325	1.78e-77	2.05e-76	Dpp9
ENSMUSG00000001247	0.49	0.15	-1.70782	0.0309574	0.0488402	Lsr
ENSMUSG00000001280	12.7	4.54	-1.48406	5.04e-63	4.7e-62	Sp1
ENSMUSG00000001288	1.71	4.09	1.2581	2.3e-09	6.02e-09	Rarg
ENSMUSG00000001305	34.3	74.19	1.11302	7.67e-54	6.25e-53	Rrp15
ENSMUSG00000001419	89.89	30.33	-1.56742	8.78e-198	3.06e-196	Mef2d
ENSMUSG00000001435	28.73	8.98	-1.67777	2.3e-136	4.95e-135	Col18a1
ENSMUSG00000001441	8.62	4.23	-1.02703	1.25e-15	4.24e-15	Npepps
ENSMUSG00000001482	21.14	6.42	-1.71933	2.27e-44	1.57e-43	Def8
ENSMUSG00000001504	8.18	19.06	1.22038	0.00034347	0.00066112	Irx2
ENSMUSG00000001517	71.31	12.75	-2.48361	0	0	Foxm1
ENSMUSG00000001576	110.49	53.27	-1.05252	2.57e-93	3.6e-92	Ergic1
ENSMUSG00000001627	68.61	320.76	2.225	0	0	Ifrd1
ENSMUSG00000001632	25.48	9.39	-1.44017	2.54e-86	3.27e-85	Brpf1
ENSMUSG00000001751	39.31	14.97	-1.39282	1.13e-65	1.09e-64	Naglu
ENSMUSG00000001855	32.15	9.98	-1.68771	0	0	Nup214
ENSMUSG00000001870	0.05	0.55	3.45943	4.26e-07	9.87e-07	Ltbp1
ENSMUSG00000001911	7.99	2.05	-1.96257	4.07e-37	2.41e-36	Nfix
ENSMUSG00000001942	11.51	4.16	-1.46823	4.93e-36	2.84e-35	Siae
ENSMUSG00000001964	78.28	36.14	-1.11505	1.29e-33	7e-33	Emd
ENSMUSG00000001995	4.72	0.94	-2.32805	7.12e-51	5.54e-50	Sipa1l2
ENSMUSG00000001998	1.5	0.44	-1.76939	3.76e-10	1.02e-09	Ap4e1
ENSMUSG00000002020	1.93	0.45	-2.1006	1.22e-09	3.22e-09	Ltbp2
ENSMUSG00000002028	4.23	0.86	-2.29825	3.17e-98	4.74e-97	Kmt2a
ENSMUSG00000002032	0.95	0.43	-1.14359	0.00263377	0.00469952	Tmem25
ENSMUSG00000002052	26.37	10.9	-1.27457	2.8e-179	8.38e-178	Supt6
ENSMUSG00000002055	29.97	11.63	-1.36567	1.23e-83	1.54e-82	Spag5
ENSMUSG00000002068	42.74	20.41	-1.06631	1.54e-44	1.07e-43	Ccne1
ENSMUSG00000002100	0.14	0.46	1.71621	0.00458378	0.00797293	Mybpc3
ENSMUSG00000002103	33.36	13.33	-1.32344	1.04e-19	4e-19	Acp2
ENSMUSG00000002107	15.82	6.69	-1.24167	4.51e-22	1.84e-21	Celf2
ENSMUSG00000002108	7.65	3.37	-1.18271	2.88e-10	7.84e-10	Nr1h3
ENSMUSG00000002129	43.03	13.44	-1.67881	4.07e-195	1.41e-193	Sf3a1
ENSMUSG00000002147	74.12	29.81	-1.31407	8.76e-160	2.24e-158	Stat6
ENSMUSG00000002227	18.89	7.23	-1.38556	1.19e-45	8.43e-45	Mov10
ENSMUSG00000002250	5.81	2.38	-1.28758	1.57e-10	4.32e-10	Ppard
ENSMUSG00000002346	1.02	0.21	-2.28011	1.88e-06	4.19e-06	Slc25a42
ENSMUSG00000002416	37.96	80.21	1.0793	3.47e-27	1.62e-26	Ndufb2
ENSMUSG00000002459	0.67	2.69	2.00537	6.22e-08	1.51e-07	Rgs20
ENSMUSG00000002486	5.33	2.04	-1.38557	0.00238866	0.00428158	Tchp
ENSMUSG00000002496	14.15	4.26	-1.73188	1.47e-92	2.04e-91	Tsc2
ENSMUSG00000002504	1.32	7.21	2.44946	2.51e-25	1.12e-24	Slc9a3r2
ENSMUSG00000002546	26.4	8	-1.72247	3.06e-89	4.09e-88	Golga2
ENSMUSG00000002565	1.58	3.73	1.23925	3.9e-09	1.01e-08	Scin
ENSMUSG00000002580	20.55	56.59	1.46141	1.98e-38	1.21e-37	Mien1
ENSMUSG00000002608	22.69	9.8	-1.2112	1.47e-31	7.68e-31	Ccdc97
ENSMUSG00000002668	2.83	0.75	-1.91584	9.53e-11	2.65e-10	Dennd1c
ENSMUSG00000002748	22.7	6.31	-1.84698	9.42e-153	2.29e-151	Baz1b
ENSMUSG00000002781	12.92	6.01	-1.10417	2.93e-17	1.05e-16	Tmem143
ENSMUSG00000002797	1.32	4.79	1.85949	5.69e-05	0.000115883	Ggct
ENSMUSG00000002799	1.06	0.3	-1.82103	1.59e-06	3.57e-06	Jag2
ENSMUSG00000002812	71.5	32.77	-1.12557	3.77e-299	2.32e-297	Flii
ENSMUSG00000002814	9.47	4.26	-1.15251	5.98e-23	2.51e-22	Top3a
ENSMUSG00000002835	41.7	11.52	-1.85591	3.68e-158	9.27e-157	Chaf1a
ENSMUSG00000002870	101.37	21.61	-2.22986	0	0	Mcm2
ENSMUSG00000002871	42.13	11.14	-1.9191	4.87e-15	1.61e-14	Tpra1
ENSMUSG00000002885	1.67	0.81	-1.04385	0.00107897	0.00199289	Adgre5
ENSMUSG00000002897	41.67	12.84	-1.69836	1.12e-80	1.34e-79	Il17ra
ENSMUSG00000002908	0.72	0.26	-1.46949	0.000814887	0.00152334	Kcnn1
ENSMUSG00000002968	34.56	11.64	-1.57001	1.18e-59	1.06e-58	Med25
ENSMUSG00000002985	2.11	5.75	1.44632	5.26e-08	1.28e-07	Apoe
ENSMUSG00000002992	0.35	1.81	2.37056	0.00756354	0.0128713	Apoc2
ENSMUSG00000002996	16.59	7.72	-1.10364	4.7e-17	1.67e-16	Hbp1
ENSMUSG00000003032	3.31	1.56	-1.08529	5.28e-07	1.21e-06	Klf4
ENSMUSG00000003037	64.01	21.2	-1.59423	1.54e-26	7.12e-26	Rab8a
ENSMUSG00000003119	7.48	2.22	-1.75248	1.11e-47	8.1e-47	Cdk12
ENSMUSG00000003153	17.49	5.2	-1.74995	2.69e-41	1.74e-40	Slc2a3
ENSMUSG00000003154	4.7	1.47	-1.67684	2.2e-28	1.06e-27	Foxj2
ENSMUSG00000003166	32.7	15.64	-1.06405	8.28e-58	7.17e-57	Dgcr2
ENSMUSG00000003198	0.29	0.86	1.56828	0.0107331	0.0179428	Zfp959
ENSMUSG00000003228	3.3	1.63	-1.01759	1.56e-06	3.5e-06	Grk5
ENSMUSG00000003233	9.64	1.34	-2.8468	6.52e-52	5.15e-51	Dvl3
ENSMUSG00000003316	44.36	8.77	-2.33861	0	0	Glg1
ENSMUSG00000003344	15.94	6.93	-1.20172	5.81e-31	2.99e-30	Btbd2
ENSMUSG00000003348	7.38	1.64	-2.16993	3.01e-31	1.56e-30	Mob3a
ENSMUSG00000003355	12.38	30.79	1.31445	2.21e-18	8.17e-18	Fkbp11
ENSMUSG00000003378	0.31	0.06	-2.36923	0.00444281	0.00773965	Grik5
ENSMUSG00000003380	93.3	197.37	1.08095	1.49e-90	2.03e-89	Rabac1
ENSMUSG00000003435	57.08	16.04	-1.83131	2.24e-235	1e-233	Supt5
ENSMUSG00000003458	60.03	29.22	-1.03873	1.93e-86	2.48e-85	Ncstn
ENSMUSG00000003541	3.74	32.67	3.12686	1.64e-86	2.12e-85	Ier3
ENSMUSG00000003545	0.87	0.17	-2.35548	0.00189492	0.00342446	Fosb
ENSMUSG00000003585	0.87	0.29	-1.58496	0.0244257	0.0390192	Sec14l2
ENSMUSG00000003644	62.99	14.11	-2.1584	4.37e-182	1.34e-180	Rps6ka1
ENSMUSG00000003660	46.67	16.85	-1.46975	4.2e-238	1.9e-236	Snrnp200
ENSMUSG00000003731	25.5	10.01	-1.34906	1.94e-56	1.64e-55	Kpna6
ENSMUSG00000003778	13.56	6.07	-1.15959	1.85e-30	9.37e-30	Brd8
ENSMUSG00000003779	79.09	33.87	-1.22349	3.56e-162	9.28e-161	Kif20a
ENSMUSG00000003810	19.94	5.92	-1.752	2.49e-112	4.26e-111	Mast2
ENSMUSG00000003813	61.95	30.02	-1.04518	1.4e-14	4.57e-14	Rad23a
ENSMUSG00000003847	6.93	2.51	-1.46517	1.16e-51	9.15e-51	Nfat5
ENSMUSG00000003863	0.64	2.17	1.76155	9.42e-14	2.97e-13	Ppfia3
ENSMUSG00000003865	17.75	6.44	-1.46269	3.74e-57	3.2e-56	Gys1
ENSMUSG00000003873	164.37	355.12	1.11136	1.1e-147	2.57e-146	Bax
ENSMUSG00000003882	1.02	2.75	1.43086	4.8e-09	1.24e-08	Il7r
ENSMUSG00000003955	47.65	101.05	1.08452	1.12e-35	6.37e-35	Fam162a
ENSMUSG00000003970	1933.79	4248.83	1.13563	0	0	Rpl8
ENSMUSG00000004040	14.95	7.2	-1.05408	2.78e-27	1.3e-26	Stat3
ENSMUSG00000004098	0.34	7.08	4.38014	3.6e-131	7.49e-130	Col5a3
ENSMUSG00000004099	114.4	22.15	-2.36871	0	0	Dnmt1
ENSMUSG00000004105	341.88	57.27	-2.57764	0	0	Angptl2
ENSMUSG00000004221	54.54	21.46	-1.34566	1.41e-36	8.23e-36	Ikbkg
ENSMUSG00000004263	20.35	4.92	-2.0483	6.89e-117	1.25e-115	Atn1
ENSMUSG00000004266	285.08	117.22	-1.28215	7.36618366150447e-312	5.16867189783728e-310	Ptpn6
ENSMUSG00000004317	3.86	0.82	-2.23491	2.38e-11	6.8e-11	Clcn5
ENSMUSG00000004371	0.07	0.51	2.86507	0.00183717	0.00332429	Il11
ENSMUSG00000004473	0.35	0.84	1.26303	0.00801499	0.0135861	Clec11a
ENSMUSG00000004508	3.8	1.23	-1.62734	1.5e-17	5.41e-17	Gab2
ENSMUSG00000004530	188.94	67.21	-1.49118	5.99e-269	3.13e-267	Coro1c
ENSMUSG00000004562	14.3	4.88	-1.55106	5.87e-61	5.35e-60	Arhgef40
ENSMUSG00000004568	3.59	0.78	-2.20244	8.57e-16	2.92e-15	Arhgef18
ENSMUSG00000004655	3.87	1.27	-1.60751	9.84e-12	2.87e-11	Aqp1
ENSMUSG00000004677	29.49	8.09	-1.86601	5.62e-230	2.46e-228	Myo9b
ENSMUSG00000004730	21.32	10.49	-1.02319	3.23e-34	1.78e-33	Adgre1
ENSMUSG00000004798	5.4	2.05	-1.39734	1.34e-10	3.7e-10	Ulk2
ENSMUSG00000004815	4.33	1.61	-1.42731	8.73e-36	5e-35	Dgkq
ENSMUSG00000004872	0.27	0.04	-2.75489	0.0129695	0.0214604	Pax3
ENSMUSG00000004933	0.8	2.28	1.51096	0.00259142	0.00462713	Matk
ENSMUSG00000005043	20.31	4.13	-2.29798	2.26e-136	4.87e-135	Sgsh
ENSMUSG00000005054	444.25	920.35	1.05081	3.75e-201	1.35e-199	Cstb
ENSMUSG00000005102	6.3	2.4	-1.39232	7.89e-31	4.04e-30	Eif2ak4
ENSMUSG00000005107	8.53	3.38	-1.33552	1.33e-25	5.99e-25	Slc2a9
ENSMUSG00000005124	0.4	1.16	1.53605	5.37e-08	1.31e-07	Wisp1
ENSMUSG00000005125	9.51	61.62	2.69588	9.64416140682113e-321	7.15377411239375e-319	Ndrg1
ENSMUSG00000005142	36.99	14.06	-1.39554	9.45e-119	1.76e-117	Man2b1
ENSMUSG00000005198	68.74	9.86	-2.80149	0	0	Polr2a
ENSMUSG00000005202	0.05	2.08	5.37851	2.15e-09	5.64e-09	Shbg
ENSMUSG00000005299	52.8	17.02	-1.63331	2.95e-59	2.63e-58	Letm1
ENSMUSG00000005370	31.82	13.55	-1.23164	1.41e-84	1.78e-83	Msh6
ENSMUSG00000005374	34.15	10.56	-1.69328	6.04e-52	4.78e-51	Tbl2
ENSMUSG00000005410	164.02	66.65	-1.29919	3.22e-295	1.94e-293	Mcm5
ENSMUSG00000005442	80.01	26.25	-1.60786	0	0	Cic
ENSMUSG00000005469	44.15	20.76	-1.08861	7.83e-54	6.37e-53	Prkaca
ENSMUSG00000005470	95.62	41.59	-1.20108	7.64e-104	1.21e-102	Asf1b
ENSMUSG00000005505	5.2	1.93	-1.42991	3.84e-16	1.32e-15	Kbtbd4
ENSMUSG00000005510	69.21	149.84	1.11437	5.74e-82	7.03e-81	Ndufs3
ENSMUSG00000005534	1.67	0.51	-1.71128	1.64e-11	4.71e-11	Insr
ENSMUSG00000005580	2.27	0.89	-1.35082	5.27e-10	1.42e-09	Adcy9
ENSMUSG00000005583	19.17	3.29	-2.54269	3.94e-39	2.43e-38	Mef2c
ENSMUSG00000005615	14.46	6.4	-1.17592	2.59e-43	1.74e-42	Pcyt1a
ENSMUSG00000005621	14.59	6.61	-1.14226	4.69e-54	3.84e-53	Zfp592
ENSMUSG00000005682	4.63	1.2	-1.94798	5.08e-29	2.49e-28	Pan2
ENSMUSG00000005686	5.65	2.64	-1.09771	2.97e-06	6.57e-06	Ampd3
ENSMUSG00000005718	21.69	8.82	-1.29818	1.21e-34	6.73e-34	Tfap4
ENSMUSG00000005779	341.36	806.53	1.24043	0	0	Psmb4
ENSMUSG00000005803	0.82	1.77	1.11005	0.00723705	0.01234	Sqrdl
ENSMUSG00000005871	1.94	0.48	-2.01495	0.00380534	0.00668432	Apc
ENSMUSG00000005886	5.74	1.13	-2.34473	1.23e-47	9.01e-47	Ncoa2
ENSMUSG00000005893	5.66	0.44	-3.68523	1.6e-76	1.82e-75	Nr2c2
ENSMUSG00000005899	37.64	12.02	-1.64683	8.38e-70	8.6e-69	Smpd4
ENSMUSG00000005936	52.83	16.37	-1.6903	1.14e-71	1.22e-70	Kctd20
ENSMUSG00000005949	9.79	4.26	-1.20046	2.22e-16	7.72e-16	Ctns
ENSMUSG00000005950	0.43	4.19	3.28454	2.36e-25	1.06e-24	P2rx5
ENSMUSG00000005982	59.85	17.07	-1.80989	7.25e-120	1.37e-118	Naa60
ENSMUSG00000005983	4.76	12.28	1.36728	4.86e-10	1.31e-09	1700037C18Rik
ENSMUSG00000006134	18.7	3.56	-2.39309	2.98e-121	5.69e-120	Crkl
ENSMUSG00000006219	17.29	3.19	-2.43831	2.34e-44	1.61e-43	Fblim1
ENSMUSG00000006276	16.81	3.7	-2.18372	6.95e-81	8.39e-80	Eps15l1
ENSMUSG00000006281	17.21	5.07	-1.76319	1.5e-149	3.55e-148	Tep1
ENSMUSG00000006299	78.58	164.3	1.0641	8.54e-133	1.8e-131	Aamp
ENSMUSG00000006307	14.92	3.98	-1.90641	6.19e-97	9.1e-96	Kmt2b
ENSMUSG00000006310	97.36	199.35	1.0339	1.05e-53	8.51e-53	Zbtb32
ENSMUSG00000006313	0.21	0.86	2.03395	0.0118586	0.0197077	Upk1a
ENSMUSG00000006333	1346.56	2832.39	1.07274	0	0	Rps9
ENSMUSG00000006335	15.52	33.26	1.09966	5.06e-20	1.96e-19	Tfpt
ENSMUSG00000006360	148.73	466.15	1.6481	5.01e-190	1.63e-188	Crip1
ENSMUSG00000006445	1.25	0.27	-2.2109	5.54e-09	1.42e-08	Epha2
ENSMUSG00000006471	19.58	3.69	-2.40769	1.2e-64	1.14e-63	Ndor1
ENSMUSG00000006494	13.31	5.5	-1.27501	9.45e-18	3.42e-17	Pdk1
ENSMUSG00000006498	417.03	119.05	-1.80858	0	0	Ptbp1
ENSMUSG00000006519	460.94	1124.79	1.287	0	0	Cyba
ENSMUSG00000006527	10.21	5.09	-1.00425	3.24e-12	9.64e-12	Sfmbt1
ENSMUSG00000006585	107.47	38.62	-1.47651	4.83e-193	1.62e-191	Cdt1
ENSMUSG00000006676	74.33	32.24	-1.20509	7.51e-149	1.76e-147	Usp19
ENSMUSG00000006800	0.43	0.13	-1.72583	0.000313464	0.000604977	Sulf2
ENSMUSG00000006818	35.96	81.44	1.17934	6.58e-165	1.75e-163	Sod2
ENSMUSG00000006930	6.94	1.75	-1.98758	1.73e-22	7.18e-22	Hap1
ENSMUSG00000007039	0.12	2.2	4.1964	0.000404902	0.000775569	Ddah2
ENSMUSG00000007379	3.33	1.55	-1.10325	1.07e-14	3.5e-14	Dennd2c
ENSMUSG00000007594	1.1	0.36	-1.61143	3.02e-05	6.26e-05	Hapln4
ENSMUSG00000007617	1.42	2.85	1.00507	4.65e-07	1.07e-06	Homer1
ENSMUSG00000007646	6.57	1.66	-1.98471	2.77e-18	1.02e-17	Rad51c
ENSMUSG00000007656	54.62	160.31	1.55336	7.93e-70	8.15e-69	Arpp19
ENSMUSG00000007670	51.13	17.32	-1.56173	1.94e-188	6.27e-187	Khsrp
ENSMUSG00000007721	72.86	181.69	1.31828	2.75e-112	4.7e-111	Ccdc124
ENSMUSG00000007817	57.07	13.91	-2.03661	0	0	Zmiz1
ENSMUSG00000007827	0.63	0.22	-1.51785	2.02e-05	4.24e-05	Ankrd26
ENSMUSG00000007867	6.89	15.6	1.17897	4.02e-09	1.04e-08	Ift43
ENSMUSG00000007880	26.49	6.83	-1.95549	6.71e-213	2.66e-211	Arid1a
ENSMUSG00000007892	2339.56	5683.46	1.28053	0	0	Rplp1
ENSMUSG00000008036	183.79	437.67	1.25179	5.54e-206	2.08e-204	Ap2s1
ENSMUSG00000008129	6.12	2.91	-1.07251	7.41e-09	1.89e-08	4930432K21Rik
ENSMUSG00000008153	0.5	0.02	-4.64386	0.000145836	0.000289155	Clstn3
ENSMUSG00000008307	0.57	0.1	-2.51096	0.000145836	0.000289155	1700109H08Rik
ENSMUSG00000008384	24.66	125.98	2.35295	1.1e-241	5.08e-240	Sertad1
ENSMUSG00000008435	17.89	8.59	-1.05842	3.52e-09	9.13e-09	Rdh13
ENSMUSG00000008496	1.4	3.06	1.1281	1.72e-29	8.55e-29	Pou2f2
ENSMUSG00000008604	58.04	24.25	-1.25906	3.09e-108	5.1e-107	Ubqln4
ENSMUSG00000008682	654.91	250.06	-1.38902	3.58e-220	1.5e-218	Rpl10
ENSMUSG00000008683	1180.85	2671.99	1.17809	0	0	Rps15a
ENSMUSG00000008730	16.9	8.22	-1.03981	4.38e-47	3.19e-46	Hipk1
ENSMUSG00000008763	11.3	4.97	-1.18501	2.8e-12	8.35e-12	Man1a2
ENSMUSG00000008822	4.23	11.84	1.48494	2.79e-08	6.9e-08	Acyp1
ENSMUSG00000008855	65.87	27.92	-1.23832	2.85e-176	8.3e-175	Hdac5
ENSMUSG00000008859	10.97	28.61	1.38296	2.66e-61	2.43e-60	Rala
ENSMUSG00000009013	105.18	211.32	1.00657	4.23e-63	3.95e-62	Dynll1
ENSMUSG00000009035	61.98	22.87	-1.43835	5.58e-170	1.56e-168	Tmem184b
ENSMUSG00000009073	95.27	17.8	-2.42014	0	0	Nf2
ENSMUSG00000009090	38.04	18.02	-1.07792	1.74e-82	2.15e-81	Ap1b1
ENSMUSG00000009112	28.26	4.11	-2.78155	1.01e-53	8.21e-53	Bcl2l13
ENSMUSG00000009376	0.02	0.58	4.85798	5.55e-09	1.42e-08	Met
ENSMUSG00000009406	7.59	2.01	-1.9169	4.78e-36	2.75e-35	Elk1
ENSMUSG00000009418	22.45	1.09	-4.36432	1.38e-285	7.84e-284	Nav1
ENSMUSG00000009470	53.47	16.22	-1.72096	6.38e-67	6.29e-66	Tnpo1
ENSMUSG00000009549	126.09	257.06	1.02765	1.12e-93	1.57e-92	Srp14
ENSMUSG00000009569	4.03	1.68	-1.26232	3.14e-26	1.44e-25	Mkl2
ENSMUSG00000009621	5.14	2.23	-1.20472	4.87e-23	2.05e-22	Vav2
ENSMUSG00000009654	5.03	1.87	-1.42752	0.00265583	0.00473758	Oit3
ENSMUSG00000009681	0.33	0.13	-1.34395	0.00647851	0.0111079	Bcr
ENSMUSG00000009733	2.24	1.08	-1.05247	4e-05	8.22e-05	Tfcp2
ENSMUSG00000009828	4.74	2.12	-1.16082	2.08e-09	5.45e-09	Ick
ENSMUSG00000009876	0.41	1.78	2.11818	0.00722652	0.0123236	Cox4i2
ENSMUSG00000009905	4.35	1.6	-1.44294	4.65e-06	1.01e-05	Kdsr
ENSMUSG00000010067	15.65	33.57	1.10101	8.01e-34	4.37e-33	Rassf1
ENSMUSG00000010095	170.79	350.77	1.0383	1.57e-187	5.04e-186	Slc3a2
ENSMUSG00000010205	107.84	38.26	-1.49498	1.34e-281	7.42e-280	Raver1
ENSMUSG00000010277	126.3	43.2	-1.54775	0	0	2610507B11Rik
ENSMUSG00000010376	171.33	378.78	1.14458	1.57e-122	3.03e-121	Nedd8
ENSMUSG00000010406	111.81	488.45	2.12716	2.24e-272	1.19e-270	Mrpl52
ENSMUSG00000010453	21.29	5.98	-1.83196	1.06e-93	1.49e-92	Kansl3
ENSMUSG00000010461	1.73	0.49	-1.81992	6e-09	1.53e-08	Eya4
ENSMUSG00000010651	0.54	2.32	2.10309	4.75e-07	1.1e-06	Acaa1b
ENSMUSG00000010663	169.85	69.39	-1.29146	8.23e-301	5.11e-299	Fads1
ENSMUSG00000010721	3.11	1.27	-1.29209	6.06e-07	1.39e-06	Lmbr1
ENSMUSG00000010936	44.53	18.25	-1.28688	2.9e-90	3.94e-89	Vac14
ENSMUSG00000011008	0.53	4.33	3.0303	7.9e-10	2.11e-09	Mcoln2
ENSMUSG00000011179	257.61	1536.56	2.57644	0	0	Odc1
ENSMUSG00000011263	0.76	0.35	-1.11864	0.00513866	0.00889519	Exoc3l2
ENSMUSG00000011382	4.36	2.05	-1.0887	4.97e-08	1.21e-07	Dhdh
ENSMUSG00000011831	3.36	1.35	-1.3155	1.05e-05	2.25e-05	Evi5
ENSMUSG00000011832	5.06	2.34	-1.11263	1.75e-08	4.36e-08	Evi5l
ENSMUSG00000011877	59.41	28.65	-1.05217	2.04e-91	2.8e-90	Git1
ENSMUSG00000012076	6.99	3.32	-1.07411	3.78e-11	1.07e-10	Brms1l
ENSMUSG00000012114	56.97	14.95	-1.93006	3.92e-224	1.67e-222	Med15
ENSMUSG00000012296	13.74	5.8	-1.24426	7.92e-26	3.59e-25	Tjap1
ENSMUSG00000012443	12.3	5.66	-1.11978	1.14e-34	6.39e-34	Kif11
ENSMUSG00000012609	4.85	1.14	-2.08895	3.27e-34	1.8e-33	Ttll5
ENSMUSG00000012848	1196.88	2679.95	1.16293	0	0	Rps5
ENSMUSG00000013033	5.35	0.91	-2.5556	3.11e-24	1.35e-23	Adgrl1
ENSMUSG00000013076	7.54	1.38	-2.4499	3.45e-97	5.08e-96	Amotl1
ENSMUSG00000013089	7.93	2.06	-1.94468	9.28e-45	6.47e-44	Etv5
ENSMUSG00000013236	30.39	7.5	-2.01863	9.45e-263	4.77e-261	Ptprs
ENSMUSG00000013275	4.82	1.33	-1.85761	1.83e-29	9.05e-29	Slc41a1
ENSMUSG00000013419	7.09	2.98	-1.25047	3.69e-32	1.95e-31	Zfp651
ENSMUSG00000013629	57.75	13.11	-2.13915	0	0	Cad
ENSMUSG00000013833	21.72	7.72	-1.49235	9.86e-49	7.38e-48	Med16
ENSMUSG00000013846	19.62	8.68	-1.17656	3.48e-59	3.1e-58	St3gal1
ENSMUSG00000013974	0.45	1.53	1.76553	0.00107663	0.00198962	Mcemp1
ENSMUSG00000014039	5.06	1.76	-1.52356	5.75e-07	1.32e-06	Prdm15
ENSMUSG00000014074	5.4	1.96	-1.46211	6.33e-18	2.3e-17	Rnf168
ENSMUSG00000014232	4.72	10.8	1.19417	6.05e-14	1.93e-13	Cluap1
ENSMUSG00000014243	17.93	48.3	1.42965	1.94e-31	1.01e-30	Zswim7
ENSMUSG00000014294	58.99	207.09	1.81172	5.01e-134	1.06e-132	Ndufa2
ENSMUSG00000014313	146.69	343.66	1.22821	3.97e-108	6.53e-107	Cox6c
ENSMUSG00000014355	41.49	14.73	-1.49401	2.05e-290	1.2e-288	Anapc1
ENSMUSG00000014426	18.66	8.74	-1.09424	2.07e-53	1.67e-52	Map3k4
ENSMUSG00000014498	39.13	3.17	-3.62572	0	0	Ankrd52
ENSMUSG00000014547	11.14	1.51	-2.88313	7.9e-49	5.93e-48	Wdfy2
ENSMUSG00000014550	6.88	3.29	-1.06432	5.43e-19	2.04e-18	Rbsn
ENSMUSG00000014599	0.23	0.87	1.91938	3.48e-06	7.65e-06	Csf1
ENSMUSG00000014633	22.93	48.76	1.08846	7.1e-22	2.89e-21	Cmc2
ENSMUSG00000014778	38.16	16.02	-1.25219	2.42e-88	3.19e-87	Fhod1
ENSMUSG00000014786	2.8	1.19	-1.23447	2.03e-11	5.81e-11	Slc9a5
ENSMUSG00000015002	12.92	4.79	-1.43151	8.28e-44	5.64e-43	Efr3a
ENSMUSG00000015027	23.47	10.41	-1.17285	3.99e-38	2.42e-37	Galns
ENSMUSG00000015087	52.17	21.35	-1.28898	2.18e-107	3.55e-106	Rabl6
ENSMUSG00000015095	27.65	10.87	-1.34693	8.65e-34	4.72e-33	Fbxw5
ENSMUSG00000015133	17.84	8.05	-1.14805	3.52e-156	8.83e-155	Lrrk1
ENSMUSG00000015202	0.65	0.2	-1.70044	0.00107663	0.00198962	Cnksr3
ENSMUSG00000015243	0.25	0.53	1.08406	0.000214431	0.00041927	Abca1
ENSMUSG00000015305	12.33	3.9	-1.66063	9.9e-91	1.35e-89	Sash1
ENSMUSG00000015312	9.49	107.32	3.49937	0	0	Gadd45b
ENSMUSG00000015335	25.91	52.56	1.02046	4.32e-30	2.17e-29	Zdhhc12
ENSMUSG00000015396	14.02	70.85	2.33728	4.53e-235	2.02e-233	Cd83
ENSMUSG00000015468	2.31	0.93	-1.31259	4.32e-14	1.38e-13	Notch4
ENSMUSG00000015522	18.91	5.74	-1.72003	5.8e-53	4.65e-52	Arnt
ENSMUSG00000015597	3.15	0.71	-2.14946	9.61e-14	3.03e-13	Zfp318
ENSMUSG00000015697	18.67	8.31	-1.1678	2.33e-54	1.92e-53	Setdb1
ENSMUSG00000015714	201.01	93.43	-1.10531	2.21e-176	6.45e-175	Cers2
ENSMUSG00000015776	32.43	14.73	-1.13857	1.13e-60	1.03e-59	Med22
ENSMUSG00000015804	65.22	139.05	1.09222	1.04e-56	8.82e-56	Med28
ENSMUSG00000015837	505.45	1547.65	1.61444	0	0	Sqstm1
ENSMUSG00000015846	4.79	0.96	-2.31892	5.21e-23	2.19e-22	Rxra
ENSMUSG00000015944	6.92	1.63	-2.0859	8.88e-74	9.81e-73	Gatsl2
ENSMUSG00000015947	17.97	7.45	-1.27028	6.27e-27	2.91e-26	Fcgr1
ENSMUSG00000015950	211.83	90.96	-1.2196	4.27e-241	1.94e-239	Ncf1
ENSMUSG00000015968	0.65	0.1	-2.70044	1.53e-13	4.79e-13	Cacna1d
ENSMUSG00000016087	9.52	4.56	-1.06193	3.48e-18	1.28e-17	Fli1
ENSMUSG00000016252	173.6	531.15	1.61335	3.68e-216	1.5e-214	Atp5e
ENSMUSG00000016344	46.53	113.08	1.28111	3.36e-63	3.15e-62	Ppdpf
ENSMUSG00000016427	35.75	73.13	1.03252	5.78e-17	2.05e-16	Ndufa1
ENSMUSG00000016477	35.56	4.33	-3.03782	2.71e-09	7.05e-09	E2f3
ENSMUSG00000016487	33.8	12.9	-1.38965	7.3e-70	7.51e-69	Ppfibp1
ENSMUSG00000016496	0.74	1.81	1.29039	2.98e-06	6.58e-06	Cd274
ENSMUSG00000016529	0.45	2.84	2.65789	2.83e-08	7e-08	Il10
ENSMUSG00000016552	8.8	2.55	-1.78701	7.02e-69	7.12e-68	Foxred2
ENSMUSG00000016664	42.36	16.63	-1.34891	4.64e-94	6.55e-93	Pacsin2
ENSMUSG00000016833	42.83	105.98	1.3071	9.78e-49	7.33e-48	Mrps18c
ENSMUSG00000016933	6.71	2.19	-1.61538	2.95e-37	1.76e-36	Plcg1
ENSMUSG00000017119	16.14	5.81	-1.47403	1.97e-53	1.59e-52	Nbr1
ENSMUSG00000017132	29.3	7.6	-1.94683	1.43e-11	4.13e-11	Cyth1
ENSMUSG00000017146	5.37	1.28	-2.06878	2.42e-50	1.87e-49	Brca1
ENSMUSG00000017167	3.16	0.56	-2.49643	1.07e-32	5.73e-32	Cntnap1
ENSMUSG00000017210	34.19	11.41	-1.58328	3.48e-106	5.62e-105	Med24
ENSMUSG00000017404	1490.53	3338	1.16316	0	0	Rpl19
ENSMUSG00000017417	20.3	6.52	-1.63854	4.62e-59	4.1e-58	Plxdc1
ENSMUSG00000017499	21.4	5.01	-2.09473	5.15e-99	7.77e-98	Cdc6
ENSMUSG00000017550	1.82	0.52	-1.80735	9.46e-23	3.95e-22	Atad5
ENSMUSG00000017631	137.86	52.3	-1.39832	1.5e-251	7.34e-250	Abr
ENSMUSG00000017652	2.22	10.44	2.23349	3.03e-25	1.35e-24	Cd40
ENSMUSG00000017670	17.92	8.75	-1.03422	5.38e-55	4.45e-54	Elmo2
ENSMUSG00000017713	2.42	5.85	1.27343	2.45e-08	6.08e-08	Tha1
ENSMUSG00000017718	3.83	0.92	-2.05764	2.01e-13	6.25e-13	Afmid
ENSMUSG00000017740	0.001	0.13	7.02237	0.0156414	0.0256236	Slc12a5
ENSMUSG00000017756	17.43	4.65	-1.90627	8.06e-111	1.37e-109	Slc12a7
ENSMUSG00000017774	142.96	33.84	-2.07881	0	0	Myo1c
ENSMUSG00000017778	146.59	370.05	1.33593	4.25e-140	9.37e-139	Cox7c
ENSMUSG00000017802	21	9.55	-1.13682	7.41e-41	4.74e-40	Fam134c
ENSMUSG00000017861	68.79	23.18	-1.56932	1.64e-243	7.59e-242	Mybl2
ENSMUSG00000017929	22.29	8.2	-1.4427	1.07e-32	5.74e-32	B4galt5
ENSMUSG00000018012	0.68	2.93	2.10729	0.00120499	0.00221653	Rac3
ENSMUSG00000018068	7.52	2.87	-1.38968	4.49e-19	1.7e-18	Ints2
ENSMUSG00000018076	4.56	1.25	-1.86711	4.89e-49	3.69e-48	Med13l
ENSMUSG00000018102	10.38	22.62	1.12379	2.79e-11	7.94e-11	Hist1h2bc
ENSMUSG00000018166	1.84	0.57	-1.69067	2.13e-13	6.63e-13	Erbb3
ENSMUSG00000018167	46.34	22.88	-1.01817	4.5e-40	2.84e-39	Stard3
ENSMUSG00000018217	23.2	55.88	1.26821	2.28e-68	2.3e-67	Pmp22
ENSMUSG00000018239	6.91	19.85	1.52238	2.28e-23	9.69e-23	Zcchc10
ENSMUSG00000018286	242.17	551.12	1.18635	5.29e-213	2.11e-211	Psmb6
ENSMUSG00000018363	8.23	3.51	-1.22942	3.97e-16	1.37e-15	Smurf2
ENSMUSG00000018381	13.38	6.68	-1.00216	2.55e-21	1.02e-20	Abi3
ENSMUSG00000018398	12.75	3.61	-1.82043	2.08e-50	1.6e-49	2018-09-08
ENSMUSG00000018401	15.63	3.42	-2.19225	6.36e-65	6.08e-64	Mtmr4
ENSMUSG00000018412	6.94	3.03	-1.19562	4.19e-31	2.17e-30	Kansl1
ENSMUSG00000018428	16.22	5.97	-1.44197	1.58e-52	1.26e-51	Akap1
ENSMUSG00000018474	23.98	5.79	-2.0502	9.72e-121	1.85e-119	Chd3
ENSMUSG00000018500	4.94	11.99	1.27925	2.15e-17	7.7e-17	Adora2b
ENSMUSG00000018501	25.35	6.29	-2.01085	3.09e-96	4.51e-95	Ncor1
ENSMUSG00000018509	14.8	31.06	1.06946	1.63e-06	3.66e-06	Cenpv
ENSMUSG00000018547	27.73	7.43	-1.90001	7.76e-166	2.07e-164	Pip4k2b
ENSMUSG00000018548	12.42	5.6	-1.14917	7.71e-55	6.37e-54	Trim37
ENSMUSG00000018585	115.39	251.51	1.1241	4.71e-73	5.11e-72	Atox1
ENSMUSG00000018648	1.02	2.15	1.07577	0.00996464	0.0167099	Dusp14
ENSMUSG00000018654	30.87	12.8	-1.27006	6.29e-52	4.98e-51	Ikzf1
ENSMUSG00000018678	12.55	2.65	-2.24362	5.27e-52	4.18e-51	Sp2
ENSMUSG00000018707	42.25	10.06	-2.07032	0	0	Dync1h1
ENSMUSG00000018740	1.43	0.51	-1.48745	0.00226501	0.00406837	Slc25a35
ENSMUSG00000018750	2.26	0.4	-2.49825	3.18e-26	1.45e-25	Zbtb4
ENSMUSG00000018800	0.15	0.001	-7.22882	0.00391328	0.0068526	Abca5
ENSMUSG00000018849	0.36	1.41	1.96963	7.03e-10	1.88e-09	Wwc1
ENSMUSG00000018909	39.35	3.37	-3.54554	1.07e-299	6.61e-298	Arrb1
ENSMUSG00000018927	0.05	0.98	4.29278	0.0034275	0.00604598	Ccl6
ENSMUSG00000018930	3.71	210.12	5.82365	0	0	Ccl4
ENSMUSG00000018931	4.86	1.84	-1.40125	5.39e-31	2.78e-30	Natd1
ENSMUSG00000018983	19.05	6.67	-1.51403	1.27e-80	1.53e-79	E2f2
ENSMUSG00000018986	4.04	1.47	-1.45854	8.92e-08	2.15e-07	Slfn3
ENSMUSG00000018999	34.47	10.49	-1.71633	1.11e-65	1.07e-64	Slc35b4
ENSMUSG00000019054	107.86	268.44	1.31544	1.04e-146	2.41e-145	Fis1
ENSMUSG00000019055	113.84	53.66	-1.08509	1.22e-146	2.82e-145	Plod1
ENSMUSG00000019066	10.74	4.12	-1.38228	2.08e-21	8.35e-21	Rab3d
ENSMUSG00000019082	29.04	12.5	-1.21611	2.77e-43	1.86e-42	Slc25a22
ENSMUSG00000019122	207.89	529.19	1.34797	0	0	Ccl9
ENSMUSG00000019158	13.58	39.04	1.52347	3.01e-31	1.56e-30	Tmem160
ENSMUSG00000019214	26.31	5.86	-2.16664	4.71e-68	4.73e-67	Chtf18
ENSMUSG00000019261	33.74	15.78	-1.09636	1.01e-58	8.93e-58	Map1s
ENSMUSG00000019295	15.54	6.45	-1.26862	1.84e-21	7.4e-21	Tmem129
ENSMUSG00000019338	19.98	3.21	-2.63791	2.29e-103	3.6e-102	Zfp687
ENSMUSG00000019464	20.52	2.5	-3.03703	1.51e-155	3.74e-154	Ptger1
ENSMUSG00000019518	9.82	3.92	-1.32487	6.27e-25	2.78e-24	Ap4m1
ENSMUSG00000019564	2.08	0.62	-1.74624	2.36e-13	7.32e-13	Arid3a
ENSMUSG00000019659	53.97	113.92	1.07779	1.11e-39	6.94e-39	Ccdc12
ENSMUSG00000019689	10.06	25.55	1.34469	4.88e-11	1.38e-10	1110001J03Rik
ENSMUSG00000019699	9.91	2.55	-1.95839	4.65e-42	3.05e-41	Akt3
ENSMUSG00000019715	18.46	6.94	-1.41139	2.34e-13	7.26e-13	Gle1
ENSMUSG00000019726	1.06	0.08	-3.72792	6.44e-34	3.53e-33	Lyst
ENSMUSG00000019731	23.6	7.84	-1.58986	3.44e-98	5.15e-97	Slc35e1
ENSMUSG00000019734	0.55	0.001	-9.10329	0.0156414	0.0256236	Tmc4
ENSMUSG00000019774	1.14	2.59	1.18392	0.00183718	0.00332429	Mtrf1l
ENSMUSG00000019779	0.28	0.1	-1.48543	0.0227353	0.0364575	Frk
ENSMUSG00000019782	35.18	92.28	1.39126	1.12e-78	1.32e-77	Rwdd1
ENSMUSG00000019791	4.8	12.48	1.37851	2.71e-10	7.37e-10	Hint3
ENSMUSG00000019796	4.26	1.94	-1.1348	2.26e-08	5.61e-08	Lrp11
ENSMUSG00000019806	48.21	112.47	1.22214	1.54e-96	2.26e-95	Aig1
ENSMUSG00000019820	0.75	0.08	-3.22882	9.27e-24	3.98e-23	Utrn
ENSMUSG00000019849	88.95	35.52	-1.32436	7.94e-165	2.1e-163	Prep
ENSMUSG00000019850	1.66	6.18	1.89642	3.18e-36	1.84e-35	Tnfaip3
ENSMUSG00000019852	2.25	0.26	-3.11334	9.03e-44	6.12e-43	Arfgef3
ENSMUSG00000019866	12.37	4.31	-1.52109	1.18e-82	1.46e-81	Aim1
ENSMUSG00000019907	4.45	1.18	-1.91502	4.67e-21	1.86e-20	Ppp1r12a
ENSMUSG00000019947	1.5	0.15	-3.32193	7.12e-18	2.58e-17	Arid5b
ENSMUSG00000019960	1.67	0.46	-1.86014	3.77e-07	8.77e-07	Dusp6
ENSMUSG00000019969	95.36	37.56	-1.34419	1.1e-95	1.59e-94	Psen1
ENSMUSG00000019979	6.1	1.26	-2.27539	1.87e-59	1.67e-58	Apaf1
ENSMUSG00000019984	11.08	3.91	-1.50272	1.72e-38	1.05e-37	Med23
ENSMUSG00000020009	19.91	7.2	-1.46742	9.83e-36	5.63e-35	Ifngr1
ENSMUSG00000020021	5.26	1.64	-1.68137	2.67e-46	1.92e-45	Fgd6
ENSMUSG00000020022	136.93	278.03	1.0218	6e-74	6.65e-73	Ndufa12
ENSMUSG00000020023	1.35	2.89	1.09811	0.00132178	0.00242242	Tmcc3
ENSMUSG00000020070	2.48	0.82	-1.59664	0.000657491	0.00123784	Rufy2
ENSMUSG00000020077	52.31	349.05	2.73828	0	0	Srgn
ENSMUSG00000020091	34.34	4.81	-2.83578	7.51e-126	1.49e-124	Eif4ebp2
ENSMUSG00000020092	30.87	12.27	-1.33107	2.31e-93	3.23e-92	Pald1
ENSMUSG00000020097	86.94	28.53	-1.60754	0	0	Sgpl1
ENSMUSG00000020099	0.13	0.001	-7.02237	0.00195752	0.00353072	Unc5b
ENSMUSG00000020100	8.86	3.5	-1.33995	8.89e-25	3.92e-24	Slc29a3
ENSMUSG00000020101	129.31	53.48	-1.27376	5.33e-47	3.88e-46	Vsir
ENSMUSG00000020109	24.75	11.78	-1.07109	7.07e-32	3.72e-31	Dnajb12
ENSMUSG00000020114	55.61	15.43	-1.84961	7.63e-88	1e-86	Cand1
ENSMUSG00000020135	0.11	0.02	-2.45943	0.0074061	0.0126166	Apc2
ENSMUSG00000020143	37.98	7.18	-2.40318	0	0	Dock2
ENSMUSG00000020163	76.02	202.31	1.41212	3.82e-73	4.17e-72	Uqcr11
ENSMUSG00000020178	0.2	0.81	2.01792	0.000829453	0.00154923	Adora2a
ENSMUSG00000020185	6.28	1.14	-2.46173	3.34e-64	3.16e-63	E2f7
ENSMUSG00000020196	19.27	4.81	-2.00225	4.68e-182	1.44e-180	Cabin1
ENSMUSG00000020198	51.26	15.32	-1.74242	1.45e-260	7.26e-259	Ap3d1
ENSMUSG00000020205	0.57	6.59	3.53124	3.1e-35	1.75e-34	Phlda1
ENSMUSG00000020211	64.56	20.7	-1.64101	1.02e-94	1.45e-93	Sf3a2
ENSMUSG00000020212	5.05	2.26	-1.15996	2.47e-11	7.04e-11	Mdm1
ENSMUSG00000020219	67.44	179	1.40828	4.6e-169	1.27e-167	Timm13
ENSMUSG00000020220	4.83	10.15	1.07138	3.74e-72	4.02e-71	Vps13d
ENSMUSG00000020224	44.6	102.09	1.19473	1.32e-69	1.35e-68	Llph
ENSMUSG00000020228	8.88	1.73	-2.35979	1.48e-60	1.34e-59	Helb
ENSMUSG00000020231	3.68	1.45	-1.34365	3.7e-37	2.2e-36	Dip2a
ENSMUSG00000020234	2.66	0.78	-1.76988	0.000102761	0.000205854	4930404N11Rik
ENSMUSG00000020256	1.81	0.9	-1.00799	9.28e-07	2.11e-06	Aldh1l2
ENSMUSG00000020261	6.93	3.31	-1.06602	1.36e-19	5.2e-19	Slc36a1
ENSMUSG00000020267	386.01	845.82	1.13171	7.43e-226	3.18e-224	Hint1
ENSMUSG00000020271	36.2	16.35	-1.1467	1.59e-41	1.03e-40	Fbxw11
ENSMUSG00000020272	20.29	9.03	-1.16797	1.1e-60	9.98e-60	Stk10
ENSMUSG00000020303	0.24	0.54	1.16993	0.0276903	0.0439262	Stc2
ENSMUSG00000020309	0.93	3.09	1.7323	1.04e-05	2.22e-05	Chac2
ENSMUSG00000020325	0.29	0.001	-8.17991	0.0312734	0.0491597	Fstl3
ENSMUSG00000020330	7.18	1.64	-2.13029	8.92e-43	5.93e-42	Hmmr
ENSMUSG00000020331	0.97	0.19	-2.35199	1.2e-06	2.71e-06	Hcn2
ENSMUSG00000020334	4.19	10.76	1.36066	0.000293853	0.000568651	Slc22a4
ENSMUSG00000020340	0.97	0.38	-1.35199	6.65e-06	1.43e-05	Cyfip2
ENSMUSG00000020363	0.1	0.36	1.848	0.0309574	0.0488402	Gfpt2
ENSMUSG00000020381	5.94	1.56	-1.92892	3.99e-10	1.08e-09	3010026O09Rik
ENSMUSG00000020393	3.32	1.5	-1.14622	6.29e-11	1.76e-10	Kremen1
ENSMUSG00000020413	5.93	2.57	-1.20626	5.9e-15	1.95e-14	Hus1
ENSMUSG00000020422	126.21	49.51	-1.35003	0	0	Tns3
ENSMUSG00000020423	0.92	2.85	1.63126	1.06e-09	2.8e-09	Btg2
ENSMUSG00000020424	2.45	8.16	1.73579	3.49e-16	1.2e-15	Gatsl3
ENSMUSG00000020432	0.47	0.04	-3.55459	0.0034275	0.00604598	Tcn2
ENSMUSG00000020444	38.62	82.93	1.10255	8.76e-45	6.11e-44	Guk1
ENSMUSG00000020454	36.78	13.3	-1.4675	5.37e-49	4.05e-48	Eif4enif1
ENSMUSG00000020456	77.27	27.83	-1.47327	4.6e-261	2.31e-259	Ogdh
ENSMUSG00000020460	956.01	2640.62	1.46578	0	0	Rps27a
ENSMUSG00000020472	21.28	9.83	-1.11423	5.9e-36	3.39e-35	Zkscan17
ENSMUSG00000020475	0.71	0.001	-9.47168	0.00782344	0.0132718	Pgam2
ENSMUSG00000020493	12.65	5.35	-1.24153	5.52e-34	3.03e-33	Prr11
ENSMUSG00000020520	6.99	2.53	-1.46616	1.11e-31	5.81e-31	Galnt10
ENSMUSG00000020522	8.12	3.01	-1.43172	2.38e-33	1.29e-32	Mfap3
ENSMUSG00000020527	10.01	4.16	-1.26679	1.48e-14	4.8e-14	Myo19
ENSMUSG00000020532	15.65	3.21	-2.28552	2.3e-109	3.84e-108	Acaca
ENSMUSG00000020536	32.04	13.74	-1.22149	7.95e-83	9.83e-82	Llgl1
ENSMUSG00000020538	65.59	30.15	-1.12132	1.56e-85	1.99e-84	Srebf1
ENSMUSG00000020541	21.38	8.53	-1.32564	2.39e-16	8.29e-16	Tom1l1
ENSMUSG00000020546	0.97	0.46	-1.07635	0.00411496	0.00719412	Stxbp4
ENSMUSG00000020564	13.68	6.72	-1.02554	1.78e-15	6e-15	Atxn7l1
ENSMUSG00000020573	16.71	3.73	-2.16346	1.18e-109	1.98e-108	Pik3cg
ENSMUSG00000020576	3.94	1.09	-1.85387	1.24e-36	7.23e-36	Nbas
ENSMUSG00000020593	0.98	0.2	-2.29278	2.78e-10	7.57e-10	Lpin1
ENSMUSG00000020628	20.17	8.95	-1.17225	5.39e-42	3.54e-41	Trappc12
ENSMUSG00000020640	4.83	1.21	-1.99702	5.96e-41	3.82e-40	Itsn2
ENSMUSG00000020644	20.03	46.16	1.20448	1.28e-38	7.85e-38	Id2
ENSMUSG00000020647	2.18	0.66	-1.72379	2.61e-19	9.9e-19	Ncoa1
ENSMUSG00000020649	130.96	40.95	-1.67719	5.74e-277	3.09e-275	Rrm2
ENSMUSG00000020653	1.83	0.65	-1.49333	7e-08	1.7e-07	Klf11
ENSMUSG00000020659	6.81	2.16	-1.65662	0.00014983	0.000296711	Cbll1
ENSMUSG00000020660	0.81	2.11	1.38125	0.00954371	0.0160496	Pomc
ENSMUSG00000020661	31.36	15.51	-1.01573	2.31e-12	6.91e-12	Dnmt3a
ENSMUSG00000020674	35.03	12.2	-1.52171	5.15e-200	1.84e-198	Pxdn
ENSMUSG00000020687	7.3	3.15	-1.21254	6.29e-20	2.43e-19	Cdc27
ENSMUSG00000020695	1.26	0.48	-1.39232	4.73e-09	1.22e-08	Mrc2
ENSMUSG00000020700	24.66	2.6	-3.24559	2.34e-186	7.46e-185	Map3k3
ENSMUSG00000020712	0.48	1.14	1.24793	0.000460605	0.000878894	Tcam1
ENSMUSG00000020715	4.41	2.04	-1.11221	3.91e-16	1.35e-15	Ern1
ENSMUSG00000020721	8.01	2.35	-1.76914	2.03e-61	1.87e-60	Helz
ENSMUSG00000020733	10.33	3.71	-1.47735	4.03e-19	1.52e-18	Slc9a3r1
ENSMUSG00000020740	52.08	5.67	-3.19931	1.22e-68	1.23e-67	Gga3
ENSMUSG00000020741	59.79	20.39	-1.55204	5.24e-264	2.69e-262	Cluh
ENSMUSG00000020747	9.1	1.53	-2.57233	8.36e-72	8.94e-71	Tmem94
ENSMUSG00000020770	11.6	4.87	-1.25213	1.27e-17	4.59e-17	Unk
ENSMUSG00000020776	11.39	4.71	-1.27397	2.5e-23	1.06e-22	Fbf1
ENSMUSG00000020777	24.08	10.15	-1.24636	7.31e-61	6.65e-60	Acox1
ENSMUSG00000020788	49.69	10.75	-2.20862	7.98e-296	4.84e-294	Atp2a3
ENSMUSG00000020790	32.96	8.8	-1.90514	1.79e-200	6.42e-199	Ankfy1
ENSMUSG00000020792	20.74	9.59	-1.11281	2.37e-43	1.6e-42	Exoc7
ENSMUSG00000020802	12.61	5.47	-1.20496	3.47e-64	3.28e-63	Ube2o
ENSMUSG00000020803	51.86	124.08	1.25858	5.05e-80	6.01e-79	Txndc17
ENSMUSG00000020807	1.82	0.8	-1.18587	1.36e-06	3.06e-06	4933427D14Rik
ENSMUSG00000020812	12.42	28.56	1.20133	8.71e-16	2.97e-15	1810032O08Rik
ENSMUSG00000020818	21.22	9.28	-1.19323	2.31e-10	6.32e-10	Mfsd11
ENSMUSG00000020827	35.7	8.26	-2.11171	7.13e-177	2.1e-175	Mink1
ENSMUSG00000020829	8.9	4.13	-1.10766	1.29e-12	3.91e-12	Slc46a1
ENSMUSG00000020836	0.91	0.13	-2.80735	3.44e-05	7.1e-05	Coro6
ENSMUSG00000020850	108.63	26.24	-2.04958	0	0	Prpf8
ENSMUSG00000020869	191.43	90.3	-1.08402	2.54e-209	9.71e-208	Lrrc59
ENSMUSG00000020882	1	0.4	-1.32193	0.0244257	0.0390192	Cacnb1
ENSMUSG00000020883	2.61	0.49	-2.4132	1.36e-29	6.74e-29	Fbxl20
ENSMUSG00000020888	17.28	7.77	-1.15312	4.2e-30	2.11e-29	Dvl2
ENSMUSG00000020893	9.67	2.71	-1.83522	5.13e-29	2.51e-28	Per1
ENSMUSG00000020899	29.52	14.15	-1.06089	1.86e-131	3.88e-130	Pfas
ENSMUSG00000020918	46.83	15.49	-1.5961	1.44e-131	3e-130	Kat2a
ENSMUSG00000020919	7.36	3.17	-1.21522	6.63e-26	3.01e-25	Stat5b
ENSMUSG00000020935	49.76	22.72	-1.13102	1.22e-52	9.77e-52	Dcakd
ENSMUSG00000020936	61.23	30.55	-1.00307	1.07e-46	7.73e-46	Nmt1
ENSMUSG00000020941	11.63	5.41	-1.10415	2.06e-25	9.21e-25	Map3k14
ENSMUSG00000020949	64.03	130.35	1.02557	1.93e-58	1.7e-57	Fkbp3
ENSMUSG00000020964	45.36	19.84	-1.19301	9.35e-74	1.03e-72	Sel1l
ENSMUSG00000021003	6.89	3.34	-1.04466	5.53e-15	1.83e-14	Galc
ENSMUSG00000021009	1.88	0.63	-1.57731	2.29e-12	6.88e-12	Ptpn21
ENSMUSG00000021027	2.44	1.1	-1.14938	4.9e-13	1.5e-12	Ralgapa1
ENSMUSG00000021028	3.1	7.61	1.29563	5.68e-10	1.53e-09	Mbip
ENSMUSG00000021038	28.27	13.79	-1.03565	1.13e-36	6.6e-36	Vipas39
ENSMUSG00000021040	8.82	21.58	1.29084	3.64e-26	1.66e-25	Slirp
ENSMUSG00000021047	0.46	0.18	-1.35364	0.00108392	0.00200133	Nova1
ENSMUSG00000021062	0.02	0.22	3.45943	0.0215151	0.0346039	Rab15
ENSMUSG00000021065	3.78	1.85	-1.03086	1.53e-07	3.65e-07	Fut8
ENSMUSG00000021079	15.86	31.91	1.00862	1.22e-16	4.28e-16	Timm9
ENSMUSG00000021102	58.14	149.77	1.36515	2.64e-102	4.1e-101	Glrx5
ENSMUSG00000021108	34.04	14.25	-1.25627	1.33e-78	1.56e-77	Prkch
ENSMUSG00000021118	0.89	2.45	1.4609	0.000115354	0.000230194	Plek2
ENSMUSG00000021125	0.47	6.18	3.71687	5.58e-25	2.48e-24	Arg2
ENSMUSG00000021133	18.91	5.17	-1.87091	1.58e-113	2.73e-112	Susd6
ENSMUSG00000021140	3.67	1.2	-1.61275	1.9e-46	1.37e-45	Pcnx
ENSMUSG00000021143	14.13	4.56	-1.63166	5.29e-78	6.15e-77	Pacs2
ENSMUSG00000021144	41.29	20.56	-1.00595	2.03e-49	1.54e-48	Mta1
ENSMUSG00000021180	1.67	0.31	-2.42951	1.93e-14	6.26e-14	Rps6ka5
ENSMUSG00000021182	1.73	0.23	-2.91107	1.15e-24	5.06e-24	Ccdc88c
ENSMUSG00000021185	22.92	6.22	-1.88162	1.14e-78	1.33e-77	9030617O03Rik
ENSMUSG00000021203	1.51	0.72	-1.06848	0.00342092	0.00603847	Otub2
ENSMUSG00000021224	45.3	12.4	-1.86917	3.18e-66	3.09e-65	Numb
ENSMUSG00000021238	1.11	0.5	-1.15056	0.00185416	0.00335454	Aldh6a1
ENSMUSG00000021243	64.27	146.06	1.18434	2.84e-66	2.76e-65	Fcf1
ENSMUSG00000021254	9.79	3.23	-1.59977	5.16e-40	3.24e-39	Gpatch2l
ENSMUSG00000021256	2.57	0.18	-3.8357	5.57e-20	2.16e-19	Vash1
ENSMUSG00000021262	4.36	1.67	-1.38448	2.18e-08	5.41e-08	Evl
ENSMUSG00000021275	1.73	0.76	-1.1867	5.56e-10	1.5e-09	Tecpr2
ENSMUSG00000021277	14.44	6.92	-1.06123	1.33e-28	6.43e-28	Traf3
ENSMUSG00000021279	14.5	1.61	-3.17092	3.7e-218	1.54e-216	Cdc42bpb
ENSMUSG00000021280	0.3	1.17	1.96347	1.35e-05	2.86e-05	Exoc3l4
ENSMUSG00000021287	6.18	1.13	-2.45128	1.5e-25	6.77e-25	Xrcc3
ENSMUSG00000021290	96.72	262.46	1.44021	2.11e-79	2.49e-78	2010107E04Rik
ENSMUSG00000021298	0.85	4.55	2.42033	4.97e-21	1.97e-20	Gpr132
ENSMUSG00000021311	13.83	4.09	-1.75763	1.25e-70	1.31e-69	Mtr
ENSMUSG00000021327	5.5	2.67	-1.04259	1.79e-11	5.13e-11	Zkscan3
ENSMUSG00000021338	4.24	8.6	1.02027	0.0126394	0.0209623	Lrrc16a
ENSMUSG00000021340	1.41	0.35	-2.01027	0.00022598	0.00044112	Gpld1
ENSMUSG00000021356	0.27	0.61	1.17585	0.006528	0.0111897	Irf4
ENSMUSG00000021366	2.28	0.56	-2.02554	3.6e-29	1.77e-28	Hivep1
ENSMUSG00000021367	0.001	1.1	10.1033	1.2e-10	3.32e-10	Edn1
ENSMUSG00000021374	20.69	8.81	-1.23172	1.96e-86	2.52e-85	Nup153
ENSMUSG00000021375	0.52	0.12	-2.11548	1.28e-06	2.89e-06	Kif13a
ENSMUSG00000021384	68.44	28.99	-1.23928	1.22e-35	6.96e-35	Susd3
ENSMUSG00000021403	0.41	2.43	2.56726	4.78e-16	1.64e-15	Serpinb9b
ENSMUSG00000021408	16.01	5.31	-1.59219	1.76e-48	1.31e-47	Ripk1
ENSMUSG00000021431	2.16	4.49	1.05568	1.46e-05	3.08e-05	Snrnp48
ENSMUSG00000021453	21.98	87.63	1.99523	7.36e-124	1.44e-122	Gadd45g
ENSMUSG00000021466	5.25	2.61	-1.00827	1.47e-16	5.16e-16	Ptch1
ENSMUSG00000021481	18.03	5.61	-1.68433	1.35e-07	3.22e-07	Zfp346
ENSMUSG00000021488	0.96	0.22	-2.12553	1.8e-19	6.85e-19	Nsd1
ENSMUSG00000021519	7.19	17.33	1.26921	1.65e-07	3.91e-07	Mterf3
ENSMUSG00000021520	108.27	283.79	1.39019	2.5e-113	4.33e-112	Uqcrb
ENSMUSG00000021536	4.84	1.95	-1.31153	1.14e-16	3.99e-16	Adcy2
ENSMUSG00000021537	25.91	53.12	1.03575	4.99e-28	2.37e-27	Cetn3
ENSMUSG00000021556	24.64	9.23	-1.4166	1.78e-71	1.89e-70	Golm1
ENSMUSG00000021557	6.31	2.99	-1.07749	1.63e-10	4.48e-10	Agtpbp1
ENSMUSG00000021559	15.87	1.02	-3.95966	4.8e-246	2.27e-244	Dapk1
ENSMUSG00000021575	0.46	0.07	-2.71621	4.72e-06	1.03e-05	Ahrr
ENSMUSG00000021591	146.29	332.89	1.18621	5.23e-217	2.14e-215	Glrx
ENSMUSG00000021606	38.8	94.82	1.28913	1.19e-39	7.41e-39	Ndufs6
ENSMUSG00000021624	44.13	18.15	-1.28179	3.67e-74	4.07e-73	Cd180
ENSMUSG00000021643	7.32	17.69	1.27302	6.19e-09	1.58e-08	Serf1
ENSMUSG00000021668	2.74	1.15	-1.25254	2.01e-09	5.27e-09	Polk
ENSMUSG00000021669	9.03	4.27	-1.08049	1.23e-19	4.69e-19	Col4a3bp
ENSMUSG00000021684	9.93	22.74	1.19537	4.06e-37	2.41e-36	Pde8b
ENSMUSG00000021686	20.29	5.56	-1.86761	6.29e-99	9.47e-98	Ap3b1
ENSMUSG00000021690	1.92	0.72	-1.41504	8.3e-16	2.83e-15	Jmy
ENSMUSG00000021701	1.09	9.88	3.18018	3.79e-66	3.68e-65	Plk2
ENSMUSG00000021725	0.14	0.44	1.65208	0.0227353	0.0364575	Parp8
ENSMUSG00000021730	0.07	0.01	-2.80735	0.0074061	0.0126166	Hcn1
ENSMUSG00000021738	1.42	0.59	-1.2671	2.36e-08	5.86e-08	Atxn7
ENSMUSG00000021756	11.12	2.92	-1.92912	3.45e-70	3.57e-69	Il6st
ENSMUSG00000021764	22.34	47.58	1.09073	1.89e-40	1.2e-39	Ndufs4
ENSMUSG00000021767	1.33	0.28	-2.24793	2.05e-11	5.86e-11	Kat6b
ENSMUSG00000021773	18.72	43.64	1.22107	8.59e-17	3.04e-16	Comtd1
ENSMUSG00000021806	0.7	0.14	-2.32193	4.48e-07	1.04e-06	Nid2
ENSMUSG00000021819	18.46	5.55	-1.73384	2.09e-119	3.92e-118	Zswim8
ENSMUSG00000021820	10.56	3.82	-1.46697	1.02e-35	5.84e-35	Camk2g
ENSMUSG00000021823	10.3	2.01	-2.35738	1.55e-90	2.11e-89	Vcl
ENSMUSG00000021824	35.03	12.06	-1.53836	3.24e-08	7.98e-08	Ap3m1
ENSMUSG00000021867	0.8	1.61	1.00899	0.0162122	0.0265017	Tmem254b
ENSMUSG00000021876	7.22	3.32	-1.12082	1.72e-08	4.29e-08	Rnase4
ENSMUSG00000021886	0.76	3.93	2.37046	5.37e-15	1.78e-14	Gpr65
ENSMUSG00000021901	28.25	13.62	-1.05252	2.04e-51	1.6e-50	Bap1
ENSMUSG00000021903	0.06	1.74	4.85798	3.7e-21	1.47e-20	Galnt15
ENSMUSG00000021905	23.9	48.85	1.03135	1.85e-17	6.64e-17	Dph3
ENSMUSG00000021910	68.52	23.34	-1.55372	1.11e-301	7.02e-300	Nisch
ENSMUSG00000021930	22.18	78.54	1.82417	1.93e-196	6.67e-195	Spryd7
ENSMUSG00000021951	47.02	95.76	1.02615	5.27e-40	3.31e-39	N6amt2
ENSMUSG00000021952	8.69	1.84	-2.23965	2.3e-70	2.39e-69	Xpo4
ENSMUSG00000021959	4.46	1.94	-1.20099	5.26e-20	2.04e-19	Lats2
ENSMUSG00000021962	9.09	3.91	-1.21711	1.78e-34	9.89e-34	Dcp1a
ENSMUSG00000021978	48.5	11.91	-2.02581	0	0	Extl3
ENSMUSG00000021987	13.3	4.82	-1.46432	1.21e-45	8.55e-45	Mtmr6
ENSMUSG00000021990	22.29	7.21	-1.62833	4.81e-116	8.64e-115	Spata13
ENSMUSG00000022003	7	2.18	-1.68303	2.65e-14	8.54e-14	Slc25a30
ENSMUSG00000022010	39.34	118.6	1.59204	2e-194	6.78e-193	Tsc22d1
ENSMUSG00000022013	35.14	73.57	1.066	1.08e-26	5.01e-26	Dnajc15
ENSMUSG00000022016	2.61	1.04	-1.32747	3.08e-20	1.2e-19	Akap11
ENSMUSG00000022018	0.97	2.65	1.44994	0.00369432	0.00649721	Rgcc
ENSMUSG00000022021	4.8	2.04	-1.23447	3.85e-12	1.14e-11	Diaph3
ENSMUSG00000022043	50.48	21.49	-1.23205	6.84e-117	1.25e-115	Trim35
ENSMUSG00000022066	1.75	0.63	-1.47393	1.86e-06	4.15e-06	Gm21685
ENSMUSG00000022075	3.5	1.37	-1.35318	1.31e-15	4.44e-15	Rhobtb2
ENSMUSG00000022094	31.14	14.39	-1.1137	7.73e-60	6.94e-59	Slc39a14
ENSMUSG00000022095	4.45	2.21	-1.00976	3.11e-10	8.45e-10	Fam160b2
ENSMUSG00000022100	6.62	1.9	-1.80083	5.63e-114	9.83e-113	Xpo7
ENSMUSG00000022105	3.35	0.93	-1.84886	6.63e-07	1.52e-06	Rb1
ENSMUSG00000022126	16.14	95.91	2.57104	0	0	Irg1
ENSMUSG00000022141	2.2	0.43	-2.35509	5.41e-34	2.97e-33	Nipbl
ENSMUSG00000022142	16.67	6.37	-1.38789	1.45e-82	1.79e-81	Nup155
ENSMUSG00000022150	99.03	20.86	-2.24713	0	0	Dab2
ENSMUSG00000022185	52.9	22.88	-1.20918	1.57e-76	1.79e-75	Acin1
ENSMUSG00000022191	15.97	6.2	-1.36502	4.92e-63	4.59e-62	Drosha
ENSMUSG00000022193	168.84	356.73	1.07918	4.96e-141	1.1e-139	Psmb5
ENSMUSG00000022205	45.02	139.38	1.63039	1.07e-120	2.04e-119	Sub1
ENSMUSG00000022227	0.001	0.59	9.20457	0.00782344	0.0132718	Mcpt1
ENSMUSG00000022231	3.63	1.12	-1.69647	5.38e-44	3.68e-43	Sema5a
ENSMUSG00000022263	5.77	1.46	-1.9826	1.82e-88	2.41e-87	Trio
ENSMUSG00000022269	0.001	0.76	9.56986	0.0156414	0.0256236	2018-03-11
ENSMUSG00000022303	42.39	130.01	1.61683	2.27e-244	1.06e-242	Dcstamp
ENSMUSG00000022304	0.001	0.21	7.71425	0.0312734	0.0491597	Dpys
ENSMUSG00000022335	3.63	1.57	-1.2092	1.09e-11	3.16e-11	Zfat
ENSMUSG00000022338	9.16	28.03	1.61355	1.34e-68	1.35e-67	Eny2
ENSMUSG00000022346	31.64	77.69	1.29598	2.32e-80	2.77e-79	Myc
ENSMUSG00000022354	86.01	188.38	1.13107	3.65e-68	3.67e-67	Ndufb9
ENSMUSG00000022360	6.55	1.87	-1.80846	2.17e-45	1.53e-44	Atad2
ENSMUSG00000022364	6.75	3.1	-1.12262	8.96e-15	2.94e-14	Tbc1d31
ENSMUSG00000022377	6.51	2.42	-1.42765	4.19e-22	1.71e-21	Asap1
ENSMUSG00000022385	25.43	10.76	-1.24085	4.63e-47	3.37e-46	Gtse1
ENSMUSG00000022387	15.23	7.35	-1.0511	1.42e-20	5.56e-20	Brd1
ENSMUSG00000022389	14.99	6.52	-1.20106	5.29e-18	1.93e-17	Tef
ENSMUSG00000022390	14.53	3.34	-2.12111	1.09e-123	2.13e-122	Zc3h7b
ENSMUSG00000022394	27.55	11.96	-1.20383	3.3e-59	2.94e-58	L3mbtl2
ENSMUSG00000022400	43.92	110.62	1.33266	1.43e-132	3.02e-131	Rbx1
ENSMUSG00000022401	4.38	0.95	-2.20493	4.32e-35	2.44e-34	Xpnpep3
ENSMUSG00000022414	19.43	7.16	-1.44025	4.01e-49	3.03e-48	Tab1
ENSMUSG00000022419	0.71	0.19	-1.90182	1.87e-09	4.91e-09	Deptor
ENSMUSG00000022421	3.55	1.55	-1.19555	1.34e-07	3.19e-07	-
ENSMUSG00000022426	25.81	12.32	-1.06693	9.04e-46	6.43e-45	Josd1
ENSMUSG00000022433	23.34	10.64	-1.13331	5.09e-12	1.5e-11	Csnk1e
ENSMUSG00000022436	39.57	18.02	-1.13481	5.18e-61	4.74e-60	Sh3bp1
ENSMUSG00000022439	123.04	50.6	-1.28192	5.41e-191	1.77e-189	Parvg
ENSMUSG00000022443	223.01	53.19	-2.06788	0	0	Myh9
ENSMUSG00000022450	58.14	116.76	1.00594	2.61e-32	1.39e-31	Ndufa6
ENSMUSG00000022451	17.26	38.89	1.17197	0.0315416	0.0495452	Twf1
ENSMUSG00000022463	89.13	36.39	-1.29237	6.44e-250	3.13e-248	Srebf2
ENSMUSG00000022472	23.75	11.01	-1.10911	3.49e-30	1.75e-29	Desi1
ENSMUSG00000022517	30.92	10.23	-1.59573	4.34e-97	6.39e-96	Mgrn1
ENSMUSG00000022519	2.6	0.56	-2.21501	4.26e-06	9.29e-06	Srl
ENSMUSG00000022521	3.91	1.66	-1.23599	2.29e-16	7.97e-16	Crebbp
ENSMUSG00000022536	52.12	23.12	-1.1727	5.25e-102	8.14e-101	Glyr1
ENSMUSG00000022562	2	0.33	-2.59946	0.00324435	0.00574398	Oplah
ENSMUSG00000022565	169.82	33.22	-2.35388	0	0	Plec
ENSMUSG00000022602	0.51	1.22	1.25831	0.000783107	0.0014654	Arc
ENSMUSG00000022607	20.75	10.09	-1.04019	4.46e-42	2.93e-41	Ptk2
ENSMUSG00000022614	41.01	20.35	-1.01095	4.2e-55	3.48e-54	Lmf2
ENSMUSG00000022635	49.56	103.57	1.06336	7.31e-45	5.11e-44	Zcrb1
ENSMUSG00000022641	3.32	1.18	-1.4924	2.03e-20	7.95e-20	Bbx
ENSMUSG00000022664	4.28	1.26	-1.76419	6.18e-06	1.34e-05	Slc35a5
ENSMUSG00000022672	1.85	0.41	-2.17383	5.98e-37	3.52e-36	Prkdc
ENSMUSG00000022678	62.27	28.02	-1.15208	1.5e-71	1.6e-70	Nde1
ENSMUSG00000022680	48.94	15.7	-1.64025	1.13e-143	2.54e-142	Pdxdc1
ENSMUSG00000022702	33.3	15.34	-1.11822	4.21e-31	2.17e-30	Hira
ENSMUSG00000022708	1.02	0.3	-1.76553	1.66e-05	3.5e-05	Zbtb20
ENSMUSG00000022718	23.48	11.69	-1.00616	9.72e-67	9.54e-66	Dgcr8
ENSMUSG00000022722	2.96	8.12	1.45588	9.16e-13	2.79e-12	Arl6
ENSMUSG00000022723	3.94	1.34	-1.55596	3.01e-32	1.6e-31	Crybg3
ENSMUSG00000022742	6.63	3.05	-1.1202	9.29e-14	2.93e-13	Cpox
ENSMUSG00000022750	22.56	8.57	-1.3964	4.45e-13	1.37e-12	Klhl22
ENSMUSG00000022756	11.14	3.01	-1.88791	4.12e-16	1.42e-15	Slc7a4
ENSMUSG00000022768	3.48	0.91	-1.93515	1.11e-07	2.66e-07	Ccdc116
ENSMUSG00000022770	4.51	2.13	-1.08227	3.46e-07	8.07e-07	Dlg1
ENSMUSG00000022773	0.43	0.1	-2.10434	0.0213208	0.0343338	Ypel1
ENSMUSG00000022779	34.51	16.55	-1.06018	2.49e-35	1.41e-34	Top3b
ENSMUSG00000022788	2.7	0.66	-2.03242	1.26e-17	4.54e-17	Fgd4
ENSMUSG00000022790	2.69	1.08	-1.31657	0.000433055	0.000827784	Igsf11
ENSMUSG00000022799	4.27	1.79	-1.25428	6.64e-25	2.94e-24	Arhgap31
ENSMUSG00000022801	6.56	2.72	-1.27009	7.92e-24	3.41e-23	Lrch3
ENSMUSG00000022802	1.05	0.45	-1.22239	0.000321724	0.000620272	Lmln
ENSMUSG00000022814	49.27	23.67	-1.05765	1.38e-84	1.74e-83	Umps
ENSMUSG00000022817	86.1	34.41	-1.32319	1.67e-175	4.85e-174	Itgb5
ENSMUSG00000022843	0.26	0.08	-1.70044	0.0213208	0.0343338	Clcn2
ENSMUSG00000022861	1.15	0.03	-5.26053	1.28e-14	4.17e-14	Dgkg
ENSMUSG00000022885	9.2	0.95	-3.27563	9.01e-64	8.48e-63	St6gal1
ENSMUSG00000022897	19.93	6.23	-1.67764	6.48e-18	2.35e-17	Dyrk1a
ENSMUSG00000022898	29.27	14.57	-1.00642	1.53e-07	3.63e-07	Dscr3
ENSMUSG00000022945	40.07	15.84	-1.33895	6.09e-56	5.11e-55	Chaf1b
ENSMUSG00000022946	6	1.23	-2.2863	9.39e-72	1e-70	Dopey2
ENSMUSG00000022957	2.42	1.2	-1.01197	3.82e-06	8.37e-06	Itsn1
ENSMUSG00000022962	87.18	39.57	-1.13959	1.91e-155	4.73e-154	Gart
ENSMUSG00000022973	19.49	3.11	-2.64775	4.82e-55	3.99e-54	Synj1
ENSMUSG00000022983	14.86	6.24	-1.25182	5.96e-43	3.98e-42	Scaf4
ENSMUSG00000022986	0.001	0.14	7.12928	0.0312734	0.0491597	Krt75
ENSMUSG00000022996	1.13	2.39	1.08069	0.000256267	0.000498144	Wnt10b
ENSMUSG00000023008	58.26	21.13	-1.46321	1.46e-194	4.97e-193	Fmnl3
ENSMUSG00000023009	3.35	1.61	-1.0571	5.67e-10	1.52e-09	Nckap5l
ENSMUSG00000023015	95.38	35.45	-1.4279	5.42e-146	1.24e-144	Racgap1
ENSMUSG00000023020	47.6	95.69	1.00741	4.63e-34	2.55e-33	Cox14
ENSMUSG00000023026	4.89	1.72	-1.50743	7.5e-39	4.61e-38	Dip2b
ENSMUSG00000023036	0.02	23.82	10.218	1.26e-208	4.8e-207	Pcdhga8
ENSMUSG00000023055	7.45	2.29	-1.70189	1.51e-24	6.6e-24	Calcoco1
ENSMUSG00000023066	1.44	0.65	-1.14756	7.83e-08	1.89e-07	Rttn
ENSMUSG00000023084	0.001	0.13	7.02237	0.0156414	0.0256236	Lrrc71
ENSMUSG00000023088	80.73	29.69	-1.44313	4.13e-267	2.15e-265	Abcc1
ENSMUSG00000023089	25.7	80.14	1.64075	7.75e-49	5.82e-48	Ndufa5
ENSMUSG00000023106	46.84	174.79	1.89981	3.86e-303	2.48e-301	Denr
ENSMUSG00000023110	70.47	26.75	-1.39747	7.23e-116	1.29e-114	Prmt5
ENSMUSG00000023169	41.3	20.24	-1.02893	2.04e-129	4.16e-128	Slc38a1
ENSMUSG00000023191	9.64	3.9	-1.30556	5.5e-21	2.18e-20	P3h3
ENSMUSG00000023235	3.24	7.08	1.12776	4e-05	8.22e-05	Ccl25
ENSMUSG00000023800	2.17	0.84	-1.36923	5.41e-12	1.6e-11	Tiam2
ENSMUSG00000023809	1.76	5.3	1.59042	4.1e-30	2.06e-29	Rps6ka2
ENSMUSG00000023827	16.78	50.7	1.59524	4.33e-59	3.85e-58	Agpat4
ENSMUSG00000023830	41.14	8.84	-2.21842	0	0	Igf2r
ENSMUSG00000023845	4.17	1.06	-1.97598	7.89e-31	4.04e-30	Lnpep
ENSMUSG00000023905	57.01	115.98	1.02459	1.76e-53	1.42e-52	Tnfrsf12a
ENSMUSG00000023909	14.54	6.33	-1.19975	7.19e-25	3.18e-24	Paqr4
ENSMUSG00000023923	10.54	3.54	-1.57405	5.24e-58	4.57e-57	Tbc1d5
ENSMUSG00000023938	6.22	2.95	-1.0762	7.71e-13	2.35e-12	Aars2
ENSMUSG00000023951	3.81	10.14	1.41219	6.94e-29	3.38e-28	Vegfa
ENSMUSG00000023952	20.65	8.72	-1.24374	5.18e-19	1.95e-18	Gtpbp2
ENSMUSG00000023953	15.65	5.12	-1.61195	9.14e-42	5.96e-41	Polh
ENSMUSG00000023977	15.19	4.46	-1.76801	1.05e-126	2.1e-125	Ubr2
ENSMUSG00000023982	4.17	14.58	1.80587	7.76e-17	2.75e-16	Guca1a
ENSMUSG00000023991	22.51	8.37	-1.42727	5.11e-42	3.36e-41	Foxp4
ENSMUSG00000023994	74.26	26.84	-1.4682	3.4e-86	4.37e-85	Nfya
ENSMUSG00000024002	24.19	7.7	-1.65148	2.08e-115	3.7e-114	Brd4
ENSMUSG00000024013	15.1	4.24	-1.83241	8.24e-45	5.75e-44	Fgd2
ENSMUSG00000024014	3.32	7.15	1.10676	2.35e-12	7.03e-12	Pim1
ENSMUSG00000024019	35.07	8.98	-1.96545	3.92e-159	9.99e-158	Cmtr1
ENSMUSG00000024030	8.69	3.69	-1.23574	9.2e-23	3.84e-22	Abcg1
ENSMUSG00000024042	1.59	0.52	-1.61244	1.42e-08	3.57e-08	Sik1
ENSMUSG00000024048	222.14	461.15	1.05377	4.83e-149	1.14e-147	Myl12a
ENSMUSG00000024050	20.87	4.91	-2.08764	2.43e-89	3.25e-88	Wiz
ENSMUSG00000024052	7.01	2.06	-1.76677	3.35e-22	1.38e-21	Lpin2
ENSMUSG00000024059	0.001	0.37	8.53138	1.93e-06	4.29e-06	Clip4
ENSMUSG00000024063	0.92	0.2	-2.20163	9.45e-06	2.02e-05	Lbh
ENSMUSG00000024066	9.7	1.86	-2.38268	2.98e-76	3.39e-75	Xdh
ENSMUSG00000024070	5.95	2.72	-1.12928	4.04e-17	1.44e-16	Prkd3
ENSMUSG00000024077	3.98	1.37	-1.53859	1.45e-12	4.38e-12	Strn
ENSMUSG00000024084	0.19	0.75	1.98089	0.00664208	0.0113718	Qpct
ENSMUSG00000024085	4.8	2.22	-1.11247	1.32e-20	5.2e-20	Man2a1
ENSMUSG00000024098	21.61	10.24	-1.07748	1.34e-46	9.65e-46	Twsg1
ENSMUSG00000024099	96.72	195.55	1.01565	5.81e-87	7.53e-86	Ndufv2
ENSMUSG00000024118	8.3	3.08	-1.43018	3.31e-09	8.6e-09	1600002H07Rik
ENSMUSG00000024121	625.49	1257.23	1.00719	3.26e-278	1.78e-276	Atp6v0c
ENSMUSG00000024130	19.35	2.76	-2.80959	2.19e-260	1.09e-258	Abca3
ENSMUSG00000024135	4.48	1.7	-1.39796	1.35e-14	4.39e-14	Srbd1
ENSMUSG00000024140	0.34	0.11	-1.62803	0.00704452	0.0120306	Epas1
ENSMUSG00000024146	31.27	64.23	1.03847	1.73e-37	1.04e-36	Cript
ENSMUSG00000024151	13.19	6.58	-1.00329	2.72e-22	1.12e-21	Msh2
ENSMUSG00000024155	0.35	0.001	-8.45121	0.00782344	0.0132718	Meiob
ENSMUSG00000024163	10.28	4.64	-1.14764	6.98e-22	2.84e-21	Mapk8ip3
ENSMUSG00000024165	63.34	30.54	-1.05242	1.89e-89	2.54e-88	Hn1l
ENSMUSG00000024169	9.84	2.79	-1.81839	3.12e-100	4.76e-99	Ift140
ENSMUSG00000024170	19.89	42.13	1.0828	0.000216982	0.000424002	Telo2
ENSMUSG00000024174	1.38	0.41	-1.75097	7.77e-07	1.77e-06	Pot1b
ENSMUSG00000024180	5.37	2.26	-1.2486	1.19e-15	4.05e-15	Tmem8
ENSMUSG00000024181	69	140.27	1.02354	1.96e-71	2.08e-70	Mrpl28
ENSMUSG00000024182	24.41	8.87	-1.46047	3.22e-47	2.34e-46	Axin1
ENSMUSG00000024186	3.03	0.93	-1.70402	2e-06	4.45e-06	Rgs11
ENSMUSG00000024190	13.83	33.59	1.28023	1.65e-49	1.25e-48	Dusp1
ENSMUSG00000024194	49.61	103.13	1.05576	2.84e-34	1.57e-33	Cuta
ENSMUSG00000024206	0.63	0.14	-2.16993	0.000197437	0.000387325	Rfx2
ENSMUSG00000024208	87.66	180.34	1.04073	2.01e-45	1.42e-44	Uqcc2
ENSMUSG00000024212	25.1	10.43	-1.26695	6.89e-62	6.34e-61	Mllt1
ENSMUSG00000024236	0.55	0.09	-2.61143	2.53e-10	6.9e-10	Svil
ENSMUSG00000024251	6.24	1.21	-2.36654	1.59e-83	1.98e-82	Thada
ENSMUSG00000024260	21.15	5.36	-1.98035	3.98e-111	6.76e-110	Sap130
ENSMUSG00000024273	5.06	10.89	1.10579	6.24e-08	1.52e-07	2700062C07Rik
ENSMUSG00000024283	22.12	9.56	-1.21027	8.81e-21	3.48e-20	Wac
ENSMUSG00000024293	1.07	2.63	1.29745	0.0184625	0.0299727	Esco1
ENSMUSG00000024298	1.71	0.83	-1.04281	8.4e-11	2.34e-10	Zfp871
ENSMUSG00000024300	73.22	22.85	-1.68004	2.71e-277	1.47e-275	Myo1f
ENSMUSG00000024327	6.5	3.17	-1.03596	1.38e-06	3.1e-06	Slc39a7
ENSMUSG00000024349	10.25	5.02	-1.02986	1.62e-13	5.06e-13	Tmem173
ENSMUSG00000024370	42.15	9.73	-2.11502	1.17e-78	1.37e-77	Cdc23
ENSMUSG00000024392	128.51	47.54	-1.43467	6.04e-203	2.2e-201	Bag6
ENSMUSG00000024397	2.2	4.98	1.17864	0.000770539	0.00144293	Aif1
ENSMUSG00000024399	2.19	12.84	2.55164	3.95e-28	1.88e-27	Ltb
ENSMUSG00000024400	20.6	9.13	-1.17396	5.53e-42	3.63e-41	Wdr33
ENSMUSG00000024401	22.72	157.58	2.79405	0	0	Tnf
ENSMUSG00000024413	30.25	5.88	-2.36305	2.67e-245	1.26e-243	Npc1
ENSMUSG00000024414	43.09	88.23	1.03392	6.1e-35	3.43e-34	Mrpl27
ENSMUSG00000024426	2.84	1.34	-1.08366	0.000644341	0.00121414	Atat1
ENSMUSG00000024431	5.33	2.51	-1.08645	1.02e-13	3.22e-13	Nr3c1
ENSMUSG00000024442	21.81	8.32	-1.39033	1.88e-43	1.26e-42	0610009O20Rik
ENSMUSG00000024451	29.26	6.85	-2.09475	7.65e-204	2.82e-202	Arap3
ENSMUSG00000024480	15.9	34.65	1.12383	8.14e-31	4.16e-30	Ap3s1
ENSMUSG00000024483	12.83	3.36	-1.93299	3.45e-94	4.88e-93	Ankhd1
ENSMUSG00000024486	0.03	0.7	4.54432	5.78e-06	1.25e-05	Hbegf
ENSMUSG00000024505	1.58	3.21	1.02265	0.000104466	0.000209077	Dtwd2
ENSMUSG00000024516	131.54	358.34	1.44583	1.66e-212	6.58e-211	Sec11c
ENSMUSG00000024524	0.74	1.7	1.19994	3.03e-07	7.08e-07	Gnal
ENSMUSG00000024535	4.46	2.22	-1.00648	2.02e-05	4.23e-05	Snx24
ENSMUSG00000024542	4.27	1.28	-1.73809	3.65e-40	2.31e-39	Cep192
ENSMUSG00000024579	24.16	9.81	-1.3003	2.95e-32	1.57e-31	Pcyox1l
ENSMUSG00000024590	106.51	49.5	-1.10549	9.47e-144	2.14e-142	Lmnb1
ENSMUSG00000024592	3.57	7.78	1.12385	2.79e-11	7.94e-11	C330018D20Rik
ENSMUSG00000024603	17.47	8.37	-1.06158	6.45e-35	3.62e-34	Dctn4
ENSMUSG00000024608	1281.48	3228.58	1.33309	0	0	Rps14
ENSMUSG00000024613	49.18	11.98	-2.03744	2.85e-241	1.3e-239	Tcof1
ENSMUSG00000024617	0.26	0.001	-8.02237	0.0312734	0.0491597	Camk2a
ENSMUSG00000024621	1133.4	379.06	-1.58016	0	0	Csf1r
ENSMUSG00000024622	8.84	3.41	-1.37427	5.72e-37	3.37e-36	Hmgxb3
ENSMUSG00000024660	88.97	32.69	-1.44447	8.77e-218	3.62e-216	Incenp
ENSMUSG00000024665	333	85.1	-1.96829	0	0	Fads2
ENSMUSG00000024667	6.68	13.37	1.00108	9.42e-08	2.26e-07	Tmem216
ENSMUSG00000024675	0.04	0.59	3.88264	0.0034275	0.00604598	Ms4a4c
ENSMUSG00000024687	15.1	6.88	-1.13407	8.14e-41	5.2e-40	Osbp
ENSMUSG00000024691	14.37	5.68	-1.3391	1.58e-36	9.19e-36	Fam111a
ENSMUSG00000024737	10.32	21.18	1.03726	5.5e-27	2.56e-26	Slc15a3
ENSMUSG00000024742	9.53	3.72	-1.35717	2.69e-19	1.02e-18	Fen1
ENSMUSG00000024759	20.99	6.31	-1.73399	3.72e-140	8.21e-139	Atl3
ENSMUSG00000024769	2.93	0.89	-1.71902	2.24e-21	8.96e-21	Cdc42bpg
ENSMUSG00000024773	8.88	1.77	-2.32681	1.14e-96	1.67e-95	Atg2a
ENSMUSG00000024778	1	16.68	4.06005	3.79e-73	4.14e-72	Fas
ENSMUSG00000024781	301.54	91.54	-1.71988	0	0	Lipa
ENSMUSG00000024795	2.03	0.7	-1.53605	4.15e-12	1.23e-11	Kif20b
ENSMUSG00000024812	36.78	13.22	-1.4762	8.86e-136	1.9e-134	Tjp2
ENSMUSG00000024816	28.82	9.6	-1.58596	1.36e-73	1.49e-72	Frmd8
ENSMUSG00000024818	19.64	7.47	-1.39461	4.79e-42	3.15e-41	Slc25a45
ENSMUSG00000024826	60.31	25.31	-1.25269	3.06e-57	2.62e-56	Dpf2
ENSMUSG00000024833	36.54	15.48	-1.23907	1.58e-58	1.39e-57	Pola2
ENSMUSG00000024855	11.21	1.59	-2.81769	1.88e-100	2.88e-99	Pacs1
ENSMUSG00000024858	129.75	58.12	-1.15863	2.81e-77	3.23e-76	Adrbk1
ENSMUSG00000024869	14.94	30.19	1.01489	8.84e-12	2.58e-11	Nudt8
ENSMUSG00000024883	3.84	0.75	-2.35614	1.26e-28	6.09e-28	Rin1
ENSMUSG00000024892	3.68	1.46	-1.33374	1.72e-13	5.39e-13	Pcx
ENSMUSG00000024900	29.94	8.42	-1.83018	5.87e-146	1.34e-144	Cpt1a
ENSMUSG00000024902	16.29	34.74	1.09261	6.81e-54	5.56e-53	Mrpl11
ENSMUSG00000024908	15.34	7.47	-1.03812	8.41e-41	5.37e-40	Ppp6r3
ENSMUSG00000024913	26.27	4.85	-2.43736	2.35e-273	1.26e-271	Lrp5
ENSMUSG00000024925	23.09	49.46	1.09899	7.54e-25	3.33e-24	Rnaseh2c
ENSMUSG00000024947	20.06	9.31	-1.10747	2.36e-39	1.46e-38	Men1
ENSMUSG00000024949	142.04	53	-1.42223	4.72e-182	1.44e-180	Sf1
ENSMUSG00000024953	78.45	230.5	1.55492	1.69e-192	5.6e-191	Prdx5
ENSMUSG00000024960	16.68	6.15	-1.43946	2.31e-59	2.06e-58	Plcb3
ENSMUSG00000024969	40.52	15.13	-1.42122	1.02e-112	1.74e-111	Mark2
ENSMUSG00000024978	5.88	1.41	-2.06012	7.62e-34	4.16e-33	Gpam
ENSMUSG00000025001	8.98	2.06	-2.12407	1.39e-31	7.26e-31	Hells
ENSMUSG00000025006	1.37	0.19	-2.8501	1.83e-07	4.32e-07	Sorbs1
ENSMUSG00000025007	53.03	21.52	-1.30113	3.37e-115	5.95e-114	Aldh18a1
ENSMUSG00000025017	72.92	7.27	-3.32629	0	0	Pik3ap1
ENSMUSG00000025026	6.31	2.68	-1.23541	2.65e-21	1.06e-20	Add3
ENSMUSG00000025034	33.5	15.46	-1.11562	2.05e-59	1.83e-58	Trim8
ENSMUSG00000025047	20.99	9.77	-1.10327	3.98e-67	3.95e-66	Pdcd11
ENSMUSG00000025058	1.24	3.56	1.52154	4.98e-14	1.59e-13	5430427O19Rik
ENSMUSG00000025060	11.95	4.48	-1.41544	3.06e-40	1.94e-39	Slk
ENSMUSG00000025076	18.34	7.02	-1.38545	8.06e-36	4.62e-35	Casp7
ENSMUSG00000025077	5.42	2.65	-1.0323	1.59e-13	4.99e-13	Dclre1a
ENSMUSG00000025085	0.54	0.23	-1.23133	0.00152433	0.00278107	Ablim1
ENSMUSG00000025140	4	1.86	-1.1047	0.000198068	0.000388445	Pycr1
ENSMUSG00000025153	102.24	30.95	-1.72395	0	0	Fasn
ENSMUSG00000025154	0.66	0.08	-3.04439	2.27e-05	4.74e-05	Arhgap19
ENSMUSG00000025161	156.95	75.19	-1.06169	4.53e-41	2.92e-40	Slc16a3
ENSMUSG00000025188	20.47	9.77	-1.06708	1.11e-32	5.93e-32	Hps1
ENSMUSG00000025195	2.19	0.23	-3.25123	3.36e-27	1.57e-26	Dnmbp
ENSMUSG00000025207	2.23	0.27	-3.04601	2.09e-24	9.11e-24	Sema4g
ENSMUSG00000025212	42.29	10.93	-1.95202	9.1e-156	2.26e-154	Sfxn3
ENSMUSG00000025213	0.98	2.09	1.09265	0.0164996	0.0269308	Kazald1
ENSMUSG00000025224	22.15	2.93	-2.91833	5.41e-260	2.68e-258	Gbf1
ENSMUSG00000025227	22.87	10.63	-1.10531	1.99e-25	8.93e-25	Tmem180
ENSMUSG00000025231	11.84	2.92	-2.01963	2.38e-45	1.68e-44	Sufu
ENSMUSG00000025241	2.11	0.66	-1.67671	4.57e-16	1.57e-15	Fyco1
ENSMUSG00000025245	2.08	4.96	1.25376	1.59e-06	3.58e-06	Lztfl1
ENSMUSG00000025246	13.37	4.18	-1.67742	3.12e-73	3.42e-72	Tbl1x
ENSMUSG00000025261	30.97	4.37	-2.82517	0	0	Huwe1
ENSMUSG00000025262	1.3	0.14	-3.21501	1.89e-18	7.01e-18	Fam120c
ENSMUSG00000025264	25.25	52.44	1.05438	3.07e-35	1.73e-34	Tsr2
ENSMUSG00000025266	12.69	4.86	-1.38466	2.59e-44	1.79e-43	Gnl3l
ENSMUSG00000025278	36.63	11.56	-1.66388	8.30511488630094e-311	0	Flnb
ENSMUSG00000025283	45.36	113.05	1.31747	1.92e-91	2.64e-90	Sat1
ENSMUSG00000025290	1445.28	3438.66	1.2505	0	0	Rps24
ENSMUSG00000025323	0.73	0.28	-1.38247	8.47e-05	0.000170635	Sp4
ENSMUSG00000025332	25.08	7.84	-1.67761	8.23e-165	2.17e-163	Kdm5c
ENSMUSG00000025348	1.59	3.2	1.00905	9.92e-08	2.38e-07	Itga7
ENSMUSG00000025350	0.39	4.44	3.50901	2.89e-09	7.51e-09	Rdh5
ENSMUSG00000025358	46.81	15.78	-1.56872	2.03e-100	3.11e-99	Cdk2
ENSMUSG00000025362	1739.42	4267.67	1.29484	0	0	Rps26
ENSMUSG00000025366	43.45	18.6	-1.22405	4.17e-102	6.47e-101	Esyt1
ENSMUSG00000025369	39.11	7.01	-2.48005	5.88486978251412e-310	3.98e-308	Smarcc2
ENSMUSG00000025375	0.59	0.14	-2.07529	5.76e-06	1.25e-05	Aatk
ENSMUSG00000025404	29.3	12.09	-1.27709	7.07e-122	1.36e-120	R3hdm2
ENSMUSG00000025408	7.14	23.59	1.72418	2.5e-23	1.06e-22	Ddit3
ENSMUSG00000025409	15.38	4.46	-1.78594	9.79e-79	1.15e-77	Mbd6
ENSMUSG00000025417	24.62	11.04	-1.15709	1.09e-49	8.34e-49	Pip4k2c
ENSMUSG00000025422	0.47	0.19	-1.30666	0.00263377	0.00469952	Agap2
ENSMUSG00000025429	8.67	3.11	-1.47912	2.78e-12	8.29e-12	Pstpip2
ENSMUSG00000025473	328.88	153.32	-1.10102	1.55e-306	1.03e-304	Adam8
ENSMUSG00000025474	35.72	14.74	-1.277	1.22e-74	1.37e-73	Tubgcp2
ENSMUSG00000025484	10.27	25.57	1.31602	3.79e-31	1.96e-30	Bet1l
ENSMUSG00000025507	11.34	1.64	-2.78965	1.59e-56	1.35e-55	Pidd1
ENSMUSG00000025508	603.01	1778.54	1.56044	0	0	Rplp2
ENSMUSG00000025512	29.15	14.12	-1.04576	1.14e-08	2.88e-08	Chid1
ENSMUSG00000025571	3.29	1.43	-1.20207	6.85e-11	1.92e-10	Tnrc6c
ENSMUSG00000025574	119.04	56.13	-1.0846	1.65e-83	2.05e-82	Tk1
ENSMUSG00000025577	3.17	0.58	-2.45036	5.1e-20	1.98e-19	Cbx2
ENSMUSG00000025579	31.81	15.02	-1.0826	6.53e-64	6.16e-63	Gaa
ENSMUSG00000025583	33.93	8.64	-1.97346	4.35e-217	1.79e-215	Rptor
ENSMUSG00000025612	5.8	1.84	-1.65635	1.02e-26	4.7e-26	Bach1
ENSMUSG00000025647	147.94	70.66	-1.06605	1.3e-89	1.75e-88	Shisa5
ENSMUSG00000025648	11.31	5.1	-1.14903	6.1e-29	2.98e-28	Pfkfb4
ENSMUSG00000025702	23.69	9.71	-1.28673	2.71e-64	2.57e-63	2018-03-08
ENSMUSG00000025723	0.42	2.45	2.54432	0.000537698	0.0010194	Nmb
ENSMUSG00000025728	89.6	28.57	-1.649	2.3e-117	4.21e-116	Pigq
ENSMUSG00000025733	18.73	7.75	-1.27308	7.9e-37	4.64e-36	Rhot2
ENSMUSG00000025737	10.64	4.93	-1.10984	1.76e-15	5.96e-15	Wdr24
ENSMUSG00000025743	5.97	2.77	-1.10784	2.36e-18	8.7e-18	Sdc3
ENSMUSG00000025745	72.81	28.94	-1.33107	3.08e-89	4.11e-88	Hadha
ENSMUSG00000025793	34.41	15.93	-1.11108	4.74e-55	3.92e-54	Hgs
ENSMUSG00000025804	0.5	1.21	1.27501	0.00158952	0.00289193	Ccr1
ENSMUSG00000025821	8.64	2.89	-1.57996	6.81e-48	5.01e-47	Zfp282
ENSMUSG00000025854	48.79	16.66	-1.5502	4.1e-150	9.78e-149	Fam20c
ENSMUSG00000025856	42.24	89.21	1.0786	1.02e-108	1.7e-107	Pdgfa
ENSMUSG00000025857	14.92	7.07	-1.07747	1.02e-19	3.91e-19	Dnaaf5
ENSMUSG00000025870	9.66	3.99	-1.27563	4.29e-06	9.36e-06	Arl10
ENSMUSG00000025893	0.35	0.95	1.44057	0.00647851	0.0111079	Kbtbd3
ENSMUSG00000025911	0.59	1.62	1.45721	0.00059507	0.00112391	Adhfe1
ENSMUSG00000025912	0.54	0.23	-1.23133	0.00465245	0.00808263	Mybl1
ENSMUSG00000025937	4.26	8.6	1.01348	0.0203021	0.032791	Lactb2
ENSMUSG00000025959	0.49	0.15	-1.70782	0.00103178	0.00190982	Klf7
ENSMUSG00000025967	601.16	1603.08	1.41503	0	0	Eef1b2
ENSMUSG00000025969	192.49	90.4	-1.09039	0	0	Nrp2
ENSMUSG00000025979	7.96	19.6	1.30001	1.94e-10	5.33e-10	Mob4
ENSMUSG00000025981	8.99	25.49	1.50354	1.18e-41	7.68e-41	-
ENSMUSG00000025986	6.45	2.49	-1.37315	1.3e-29	6.44e-29	Slc39a10
ENSMUSG00000025993	0.73	0.09	-3.0199	1.11e-06	2.51e-06	Slc40a1
ENSMUSG00000026014	1.36	0.63	-1.11018	9.56e-11	2.66e-10	Raph1
ENSMUSG00000026024	5.1	1.92	-1.40939	9.03e-29	4.4e-28	Als2
ENSMUSG00000026028	12.77	5.71	-1.1612	1.21e-43	8.19e-43	Trak2
ENSMUSG00000026037	26.69	12.47	-1.09784	1.22e-07	2.92e-07	Orc2
ENSMUSG00000026039	2.3	1.09	-1.07731	2.08e-07	4.9e-07	Sgol2a
ENSMUSG00000026074	42.65	16.84	-1.34065	6.7e-65	6.41e-64	Map4k4
ENSMUSG00000026078	22.74	50.15	1.14102	9.58e-22	3.88e-21	Pdcl3
ENSMUSG00000026080	14.23	7.1	-1.00304	2.34e-19	8.9e-19	Chst10
ENSMUSG00000026090	0.16	0.67	2.06609	0.0114032	0.0190166	2010300C02Rik
ENSMUSG00000026102	5.99	2.85	-1.07159	0.00210563	0.00379207	Inpp1
ENSMUSG00000026113	2.02	0.88	-1.19878	0.000454334	0.00086731	Inpp4a
ENSMUSG00000026123	41.74	17.16	-1.28238	4.85e-67	4.8e-66	Plekhb2
ENSMUSG00000026134	35.03	15.32	-1.19317	2.49e-44	1.72e-43	Prim2
ENSMUSG00000026135	6.09	2.4	-1.34341	2.66e-27	1.25e-26	Zfp142
ENSMUSG00000026142	14.03	5.39	-1.38016	8.31e-42	5.42e-41	Rhbdd1
ENSMUSG00000026153	2.35	0.75	-1.6477	8.98e-08	2.16e-07	Fam135a
ENSMUSG00000026176	44.97	17.4	-1.36988	4.29e-85	5.44e-84	Ctdsp1
ENSMUSG00000026181	14.51	5.62	-1.36841	4.13e-56	3.47e-55	Ppm1f
ENSMUSG00000026196	4.78	1.32	-1.85647	5.6e-35	3.14e-34	Bard1
ENSMUSG00000026199	9.71	4.31	-1.17178	5.36e-16	1.84e-15	Ankzf1
ENSMUSG00000026200	7.64	2.12	-1.84951	1.14e-13	3.59e-13	Glb1l
ENSMUSG00000026204	0.08	0.39	2.2854	0.00436394	0.00760891	Ptprn
ENSMUSG00000026269	31.14	15.03	-1.05092	5.33e-70	5.49e-69	Rnpepl1
ENSMUSG00000026271	2.1	0.24	-3.12928	8.4e-15	2.76e-14	Gpr35
ENSMUSG00000026274	5.82	2.17	-1.42332	3.09e-54	2.53e-53	Pask
ENSMUSG00000026275	10.13	20.42	1.01135	0.00401245	0.00701962	Ppp1r7
ENSMUSG00000026288	123.15	18.76	-2.71468	0	0	Inpp5d
ENSMUSG00000026313	8	1.03	-2.95736	7.22e-52	5.7e-51	Hdac4
ENSMUSG00000026349	5.05	2.07	-1.28665	3.98e-08	9.76e-08	Ccnt2
ENSMUSG00000026355	261.75	95.97	-1.44753	1.46092839960157e-317	1.05945874364559e-315	Mcm6
ENSMUSG00000026358	32.95	109.91	1.73797	2.83e-147	6.57e-146	Rgs1
ENSMUSG00000026384	2.04	0.97	-1.07251	0.00755265	0.0128578	Ptpn4
ENSMUSG00000026385	175.95	369.1	1.06885	1.28e-101	1.98e-100	Dbi
ENSMUSG00000026389	20.78	7.8	-1.41365	9.8e-48	7.18e-47	Steap3
ENSMUSG00000026409	3.93	1.74	-1.17544	1.77e-08	4.41e-08	Pfkfb2
ENSMUSG00000026425	18.78	8.55	-1.1352	7.14e-56	5.97e-55	Srgap2
ENSMUSG00000026430	16.41	7.57	-1.11621	4.47e-29	2.19e-28	Rassf5
ENSMUSG00000026463	14.8	4.33	-1.77316	1.05e-116	1.91e-115	Atp2b4
ENSMUSG00000026469	18.52	5.69	-1.70258	4.91e-87	6.39e-86	Xpr1
ENSMUSG00000026471	0.76	0.27	-1.49304	0.00603095	0.0103775	Mr1
ENSMUSG00000026475	83.36	167.21	1.00423	4.35e-147	1.01e-145	Rgs16
ENSMUSG00000026483	24.11	6.07	-1.98986	3.6e-129	7.34e-128	Fam129a
ENSMUSG00000026489	1.67	0.3	-2.47681	8.12e-08	1.96e-07	Adck3
ENSMUSG00000026495	0.33	1.49	2.17477	0.0192368	0.0311712	Efcab2
ENSMUSG00000026496	95.17	24.72	-1.94483	0	0	Parp1
ENSMUSG00000026500	6.77	16.46	1.28174	4.71e-07	1.09e-06	Cox20
ENSMUSG00000026502	9.33	4.36	-1.09755	2.46e-14	7.93e-14	Desi2
ENSMUSG00000026511	50.85	122.24	1.2654	1.49e-105	2.4e-104	Srp9
ENSMUSG00000026519	15.69	6.68	-1.23193	1.17e-26	5.41e-26	Tmem63a
ENSMUSG00000026525	1.4	10.57	2.91648	2.72e-45	1.91e-44	Opn3
ENSMUSG00000026535	3.98	9.18	1.20573	1.28e-11	3.71e-11	Ifi202b
ENSMUSG00000026554	27.49	10.33	-1.41207	8.25e-55	6.8e-54	Dcaf8
ENSMUSG00000026564	0.17	0.001	-7.40939	0.00391328	0.0068526	Dusp27
ENSMUSG00000026565	2.61	0.54	-2.27302	2.87e-26	1.31e-25	Pou2f1
ENSMUSG00000026566	14.03	5.41	-1.37481	8.86e-20	3.41e-19	Mpzl1
ENSMUSG00000026568	25.68	60.75	1.24224	2.08e-42	1.37e-41	Mpc2
ENSMUSG00000026571	5.43	1.95	-1.47748	8.26e-06	1.77e-05	Dcaf6
ENSMUSG00000026582	0.001	0.21	7.71425	0.00782344	0.0132718	Sele
ENSMUSG00000026596	18.96	4.99	-1.92585	3.12e-82	3.83e-81	Abl2
ENSMUSG00000026600	89.68	43.14	-1.05576	3.58e-63	3.35e-62	Soat1
ENSMUSG00000026605	1.67	0.54	-1.62882	8.54e-20	3.29e-19	Cenpf
ENSMUSG00000026618	22.34	9.65	-1.21103	7.65e-45	5.34e-44	Iars2
ENSMUSG00000026622	38.7	16.98	-1.1885	1.18e-73	1.3e-72	Nek2
ENSMUSG00000026628	17.55	40.74	1.21497	5.49e-67	5.43e-66	Atf3
ENSMUSG00000026637	8.03	24.71	1.62162	4.21e-37	2.49e-36	Traf5
ENSMUSG00000026640	3.93	1.18	-1.73574	1.52e-80	1.83e-79	Plxna2
ENSMUSG00000026648	2.54	0.98	-1.37397	3.94e-08	9.66e-08	Dclre1c
ENSMUSG00000026662	25.01	9.75	-1.35903	2.81e-44	1.94e-43	Sephs1
ENSMUSG00000026663	22.75	8.39	-1.43912	7.42e-128	1.5e-126	Atf6
ENSMUSG00000026687	51	23.47	-1.11968	2.74e-76	3.11e-75	Aldh9a1
ENSMUSG00000026705	4.59	2.29	-1.00315	8.16e-10	2.17e-09	Klhl20
ENSMUSG00000026712	0.001	0.23	7.84549	0.00782344	0.0132718	Mrc1
ENSMUSG00000026737	20.14	9.01	-1.16046	9.34e-43	6.2e-42	Pip4k2a
ENSMUSG00000026785	35.67	13.66	-1.38475	7.82e-41	4.99e-40	Pkn3
ENSMUSG00000026788	5.76	2.41	-1.25704	2e-07	4.71e-07	Zbtb43
ENSMUSG00000026790	34.01	9.35	-1.86292	4.74e-87	6.17e-86	Odf2
ENSMUSG00000026791	6.87	2.09	-1.71681	7.46e-09	1.9e-08	Slc2a8
ENSMUSG00000026803	1.32	0.33	-2	3.35e-09	8.7e-09	Ttf1
ENSMUSG00000026812	5.13	1.48	-1.79336	9.5e-42	6.19e-41	Tsc1
ENSMUSG00000026814	7.66	3.63	-1.07737	1.48e-14	4.8e-14	Eng
ENSMUSG00000026821	14.77	5.6	-1.39917	1.6e-26	7.36e-26	Ralgds
ENSMUSG00000026827	8.86	4	-1.14731	7.02e-31	3.6e-30	Gpd2
ENSMUSG00000026842	21.01	4.31	-2.28532	1.55e-185	4.86e-184	Abl1
ENSMUSG00000026853	12.73	4.48	-1.50666	5.07e-35	2.85e-34	Crat
ENSMUSG00000026854	12.55	6.26	-1.00345	1.21e-28	5.87e-28	Usp20
ENSMUSG00000026867	17.05	6.42	-1.40913	7.77e-67	7.65e-66	Gapvd1
ENSMUSG00000026873	15.41	5.43	-1.50484	6.96e-65	6.65e-64	Phf19
ENSMUSG00000026875	7.42	64.58	3.1216	1.37e-277	7.46e-276	Traf1
ENSMUSG00000026880	86.49	29.03	-1.57499	8.93e-169	2.46e-167	Stom
ENSMUSG00000026893	0.89	2.49	1.48427	5.7e-09	1.46e-08	Gca
ENSMUSG00000026895	98.2	196.56	1.00117	3.55e-76	4.03e-75	Ndufa8
ENSMUSG00000026915	2.92	1.17	-1.31946	0.000669216	0.001259	Strbp
ENSMUSG00000026918	20.37	5.58	-1.86811	1.64e-53	1.33e-52	Brd3
ENSMUSG00000026923	3.31	0.1	-5.04876	5.33e-05	0.000108577	Notch1
ENSMUSG00000026924	21.66	7.97	-1.44238	2.75e-212	1.09e-210	Sec16a
ENSMUSG00000026925	7.87	3.48	-1.17728	7.01e-18	2.54e-17	Inpp5e
ENSMUSG00000026932	0.69	0.31	-1.15433	0.00107689	0.00198962	Nacc2
ENSMUSG00000026933	4.91	1.72	-1.51331	9.71e-24	4.16e-23	Camsap1
ENSMUSG00000026944	17.98	3.93	-2.19379	3.75e-205	1.4e-203	Abca2
ENSMUSG00000026959	0.47	0.09	-2.38466	0.000328077	0.000632334	Grin1
ENSMUSG00000026981	36.09	188.89	2.38788	0	0	Il1rn
ENSMUSG00000026987	11.38	4.07	-1.4834	2.19e-34	1.21e-33	Baz2b
ENSMUSG00000027009	20.52	5.69	-1.85053	3.89e-232	1.72e-230	Itga4
ENSMUSG00000027074	23.38	7.98	-1.55081	5.55e-52	4.4e-51	Slc43a3
ENSMUSG00000027076	41.17	103.47	1.32955	7.24e-54	5.91e-53	Timm10
ENSMUSG00000027091	16.58	36.11	1.12295	7.64e-27	3.54e-26	Zc3h15
ENSMUSG00000027111	3.25	1.04	-1.64386	1.1e-18	4.11e-18	Itga6
ENSMUSG00000027130	11.91	3.03	-1.97478	1.27e-97	1.88e-96	Slc12a6
ENSMUSG00000027165	10.24	23.1	1.17368	7.59e-11	2.12e-10	B230118H07Rik
ENSMUSG00000027168	6.66	2.44	-1.44864	3.53e-13	1.09e-12	Pax6
ENSMUSG00000027177	7.99	2.84	-1.4923	6e-23	2.52e-22	Hipk3
ENSMUSG00000027184	107.79	50.89	-1.08277	2.4e-179	7.21e-178	Caprin1
ENSMUSG00000027187	52.2	20.43	-1.35336	1.33e-98	2e-97	Cat
ENSMUSG00000027189	14.15	5.42	-1.38444	6.4e-63	5.96e-62	Trim44
ENSMUSG00000027194	31.93	11.79	-1.43735	1.38e-41	8.94e-41	Ttc17
ENSMUSG00000027198	67.14	32.12	-1.0637	1.15e-58	1.02e-57	Ext2
ENSMUSG00000027200	0.26	0.02	-3.70044	0.000404902	0.000775569	Sema6d
ENSMUSG00000027227	18.1	6.66	-1.4424	1.56e-37	9.34e-37	Sord
ENSMUSG00000027230	0.91	0.35	-1.37851	0.00369432	0.00649721	Creb3l1
ENSMUSG00000027242	7.85	1.4	-2.48727	4.63e-40	2.92e-39	Wdr76
ENSMUSG00000027244	26.18	12.15	-1.10751	7.82e-55	6.46e-54	Atg13
ENSMUSG00000027245	0.99	4.66	2.23483	2.87e-07	6.72e-07	Hypk
ENSMUSG00000027247	49.11	22.46	-1.12866	8.27e-58	7.17e-57	Arhgap1
ENSMUSG00000027254	1.23	0.18	-2.77259	4.88e-27	2.27e-26	Map1a
ENSMUSG00000027259	5.77	2.55	-1.17807	5.98e-09	1.53e-08	Adal
ENSMUSG00000027263	15.96	6.3	-1.34104	7e-44	4.78e-43	Tubgcp4
ENSMUSG00000027272	3.61	1.22	-1.56512	6.07e-27	2.82e-26	Ubr1
ENSMUSG00000027274	11.56	31.79	1.45943	1.3e-24	5.72e-24	Mkks
ENSMUSG00000027276	2.31	8.07	1.80468	4.6e-45	3.23e-44	Jag1
ENSMUSG00000027288	20.96	6.85	-1.61346	3.38e-49	2.56e-48	Zfp106
ENSMUSG00000027291	22.14	7.21	-1.61858	1.52e-94	2.16e-93	Vps39
ENSMUSG00000027293	70.07	24.54	-1.51366	2.8e-144	6.33e-143	Ehd4
ENSMUSG00000027300	4.17	1.96	-1.08919	2.18e-09	5.72e-09	Ubox5
ENSMUSG00000027303	90.16	33.71	-1.41931	4.61e-214	1.85e-212	Ptpra
ENSMUSG00000027309	3.47	1.53	-1.1814	1.1e-06	2.49e-06	4930402H24Rik
ENSMUSG00000027312	6.45	1.7	-1.92376	4.87e-73	5.28e-72	Atrn
ENSMUSG00000027322	1.25	0.45	-1.47393	5.35e-13	1.64e-12	Siglec1
ENSMUSG00000027324	5.92	2.92	-1.01963	2.08e-09	5.46e-09	Rpusd2
ENSMUSG00000027326	2.34	0.24	-3.2854	1.48e-39	9.21e-39	Casc5
ENSMUSG00000027330	63.07	22.74	-1.47172	8.66e-140	1.9e-138	Cdc25b
ENSMUSG00000027333	29.87	69.3	1.21416	1.72e-29	8.53e-29	Smox
ENSMUSG00000027339	17.69	3.17	-2.48038	1.91e-80	2.28e-79	Rassf2
ENSMUSG00000027340	52.36	16.32	-1.68182	2.09e-247	9.99e-246	Slc23a2
ENSMUSG00000027363	12.94	3.82	-1.76019	2.68e-70	2.78e-69	Usp8
ENSMUSG00000027364	1.5	5.48	1.86921	8.66e-14	2.74e-13	Usp50
ENSMUSG00000027368	4.62	16.18	1.80825	6.8e-34	3.72e-33	Dusp2
ENSMUSG00000027398	0.05	33.53	9.38931	4.04e-178	1.19e-176	Il1b
ENSMUSG00000027399	0.001	4.97	12.279	2.23e-39	1.38e-38	Il1a
ENSMUSG00000027438	0.74	0.32	-1.20945	0.00270936	0.00482643	Napb
ENSMUSG00000027456	0.05	0.87	4.12102	0.000276113	0.000535439	Sdcbp2
ENSMUSG00000027469	50.55	25.06	-1.01232	9.1e-78	1.06e-76	Tpx2
ENSMUSG00000027470	0.1	2.14	4.41954	1.85e-20	7.24e-20	Mylk2
ENSMUSG00000027472	33.04	71.25	1.10868	6.48e-49	4.87e-48	Pdrg1
ENSMUSG00000027490	26.14	11.95	-1.12925	6.9e-42	4.51e-41	E2f1
ENSMUSG00000027508	2.14	0.77	-1.47468	2.28e-11	6.51e-11	Pag1
ENSMUSG00000027514	5.73	12.66	1.14367	4.86e-06	1.06e-05	Zbp1
ENSMUSG00000027522	10.59	4.13	-1.35849	9.21e-11	2.56e-10	Stx16
ENSMUSG00000027540	103.61	21.67	-2.25739	3.2e-210	1.24e-208	Ptpn1
ENSMUSG00000027544	17.41	6.83	-1.34996	2e-116	3.61e-115	Nfatc2
ENSMUSG00000027562	0.66	33.34	5.65864	8.11e-205	3.02e-203	Car2
ENSMUSG00000027580	6.7	1.43	-2.22815	1.74e-108	2.88e-107	Helz2
ENSMUSG00000027583	0.5	1.5	1.58496	1.75e-05	3.68e-05	Zbtb46
ENSMUSG00000027584	0.001	0.17	7.40939	0.0312734	0.0491597	Oprl1
ENSMUSG00000027598	5.66	2.04	-1.47223	8.6e-24	3.7e-23	Itch
ENSMUSG00000027602	2.93	6.02	1.03886	4.84e-05	9.88e-05	Map1lc3a
ENSMUSG00000027605	4.79	2.05	-1.2244	9.01e-11	2.51e-10	Acss2
ENSMUSG00000027613	156.36	325.24	1.05663	1.28e-183	3.95e-182	Eif6
ENSMUSG00000027630	10.82	4.57	-1.24343	3.61e-12	1.07e-11	Tbl1xr1
ENSMUSG00000027634	27.79	10.57	-1.39459	2.03e-58	1.78e-57	Ndrg3
ENSMUSG00000027635	13	5.14	-1.33867	2.2e-23	9.33e-23	Dsn1
ENSMUSG00000027646	5.2	18.18	1.80577	6.81e-83	8.43e-82	Src
ENSMUSG00000027650	11.36	3.34	-1.76604	2.63e-56	2.23e-55	Tti1
ENSMUSG00000027651	13.52	5.9	-1.19631	2.94e-23	1.24e-22	Rprd1b
ENSMUSG00000027652	7.5	1.86	-2.01159	9.8e-80	1.16e-78	Ralgapb
ENSMUSG00000027655	12.07	5.84	-1.04739	1.19e-18	4.43e-18	Dhx35
ENSMUSG00000027663	5.99	2.25	-1.41263	8.1e-31	4.14e-30	Zmat3
ENSMUSG00000027678	21.71	3.71	-2.54887	6.23e-164	1.64e-162	Ncoa3
ENSMUSG00000027695	4.07	1.16	-1.8109	1.22e-22	5.07e-22	Pld1
ENSMUSG00000027698	7.76	3.65	-1.08816	2.64e-07	6.2e-07	Nceh1
ENSMUSG00000027699	12.34	5.46	-1.17637	2.13e-23	9.04e-23	Ect2
ENSMUSG00000027712	543.62	1135.27	1.06237	1.21e-209	4.65e-208	Anxa5
ENSMUSG00000027714	25.29	51.74	1.03271	7.47e-39	4.6e-38	Exosc9
ENSMUSG00000027737	3.05	9.56	1.6482	1.91e-101	2.94e-100	Slc7a11
ENSMUSG00000027742	9.26	3.66	-1.33917	2.18e-18	8.07e-18	Cog6
ENSMUSG00000027751	8.35	3.06	-1.44824	4.38e-19	1.65e-18	Supt20
ENSMUSG00000027763	65.48	26.57	-1.30126	7.51e-42	4.91e-41	Mbnl1
ENSMUSG00000027775	115.23	49.66	-1.21436	4.49e-48	3.31e-47	Mfsd1
ENSMUSG00000027827	0.001	0.24	7.90689	0.00391328	0.0068526	Kcnab1
ENSMUSG00000027843	64.36	155.15	1.26943	1.31e-13	4.13e-13	Ptpn22
ENSMUSG00000027845	20.1	9.63	-1.06159	1.39e-17	5.02e-17	Dclre1b
ENSMUSG00000027882	11.64	25.39	1.12517	8.73e-41	5.57e-40	Stxbp3
ENSMUSG00000027889	86.7	36.97	-1.22968	5.02e-181	1.51e-179	Ampd2
ENSMUSG00000027933	47.35	15.29	-1.63078	1.03e-181	3.12e-180	Ints3
ENSMUSG00000027937	47.98	96.08	1.0018	1.34e-48	1e-47	Jtb
ENSMUSG00000027947	18.58	4.23	-2.13502	1.83e-70	1.9e-69	Il6ra
ENSMUSG00000027951	48.18	22.91	-1.07246	7.74e-120	1.46e-118	Adar
ENSMUSG00000027959	10.6	3.12	-1.76445	2.44e-18	9e-18	Sass6
ENSMUSG00000027999	17.39	39.29	1.1759	3.4e-38	2.06e-37	Pla2g12a
ENSMUSG00000028018	10.02	4.33	-1.21044	9.87e-17	3.48e-16	Gstcd
ENSMUSG00000028028	2.65	0.92	-1.52629	1.29e-24	5.68e-24	Alpk1
ENSMUSG00000028042	17.74	7.3	-1.28104	8.6e-35	4.81e-34	Zbtb7b
ENSMUSG00000028053	2.92	0.87	-1.74688	5.21e-37	3.07e-36	Ash1l
ENSMUSG00000028059	99.64	43.42	-1.19837	1.17e-115	2.08e-114	Arhgef2
ENSMUSG00000028060	19.75	9.79	-1.01247	5.53e-22	2.26e-21	2810403A07Rik
ENSMUSG00000028062	116.55	256.44	1.13767	1.81e-95	2.61e-94	Lamtor2
ENSMUSG00000028064	35.98	17.44	-1.0448	6.63e-73	7.18e-72	Sema4a
ENSMUSG00000028068	44.07	10.5	-2.06941	0	0	Iqgap3
ENSMUSG00000028081	1706.85	3614.47	1.08245	0	0	Rps3a1
ENSMUSG00000028088	1.16	0.26	-2.15754	0.000178556	0.000351667	Fmo5
ENSMUSG00000028096	20.29	9.77	-1.05434	1.03e-23	4.41e-23	Gpr89
ENSMUSG00000028101	13.09	3.88	-1.75434	1.42e-28	6.86e-28	Pias3
ENSMUSG00000028106	10.16	4.56	-1.15579	2.23e-30	1.13e-29	Rprd2
ENSMUSG00000028108	29.17	13.37	-1.12549	3.78e-05	7.78e-05	Ecm1
ENSMUSG00000028114	4.23	1.15	-1.87902	4.14e-15	1.37e-14	Mettl14
ENSMUSG00000028128	0.04	1.66	5.37504	1.11e-09	2.93e-09	F3
ENSMUSG00000028133	1.59	3.39	1.09226	0.000538925	0.00102143	Rwdd3
ENSMUSG00000028136	15.04	6.56	-1.19704	3.82e-44	2.62e-43	Snx27
ENSMUSG00000028150	0.03	0.36	3.58496	0.0117402	0.0195185	Rorc
ENSMUSG00000028167	13.74	53.51	1.96143	1.98e-61	1.82e-60	Bdh2
ENSMUSG00000028175	4.4	2.14	-1.03989	2.48e-05	5.17e-05	Depdc1a
ENSMUSG00000028179	1.72	6.28	1.86836	4.59e-16	1.58e-15	Cth
ENSMUSG00000028186	0.001	0.17	7.40939	0.0312734	0.0491597	Uox
ENSMUSG00000028211	0.25	0.11	-1.18442	0.0106654	0.0178435	Trp53inp1
ENSMUSG00000028234	259.13	779.89	1.58959	0	0	Rps20
ENSMUSG00000028248	6.81	3.26	-1.06278	3.27e-08	8.04e-08	Pnisr
ENSMUSG00000028261	7.7	16.95	1.13835	9.08e-24	3.9e-23	Ndufaf4
ENSMUSG00000028282	0.99	0.49	-1.01465	0.000110175	0.000220367	Casp8ap2
ENSMUSG00000028300	9.84	22.48	1.19191	4.7e-33	2.53e-32	3110043O21Rik
ENSMUSG00000028318	18.17	37.92	1.0614	4.5e-11	1.27e-10	Polr1e
ENSMUSG00000028328	0.16	0.001	-7.32193	0.0156414	0.0256236	Tmod1
ENSMUSG00000028337	4.99	1.09	-2.19471	1.21e-31	6.36e-31	Coro2a
ENSMUSG00000028341	0.03	0.2	2.73697	0.0074061	0.0126166	Nr4a3
ENSMUSG00000028344	2.48	0.84	-1.56188	4.1e-15	1.36e-14	Invs
ENSMUSG00000028348	0.69	1.89	1.45372	0.000115354	0.000230194	Murc
ENSMUSG00000028367	406.04	1088.07	1.42208	0	0	Txn1
ENSMUSG00000028385	6.61	1.47	-2.16883	2.44e-28	1.17e-27	Snx30
ENSMUSG00000028407	1.57	5.52	1.8139	0.00384377	0.00674543	-
ENSMUSG00000028413	189.39	89.35	-1.08382	2.36e-256	1.16e-254	B4galt1
ENSMUSG00000028426	191.58	70.13	-1.44984	1.01e-103	1.59e-102	Rad23b
ENSMUSG00000028430	50.65	18.6	-1.44526	1.55e-178	4.6e-177	Nol6
ENSMUSG00000028433	48.86	9.37	-2.38253	2.41e-286	1.38e-284	Ubap2
ENSMUSG00000028438	4.27	1.04	-2.03765	1.16e-38	7.15e-38	Kif24
ENSMUSG00000028453	17.25	5.82	-1.56751	9.04e-17	3.19e-16	Fancg
ENSMUSG00000028454	11.41	5.45	-1.06597	1.08e-31	5.64e-31	Pigo
ENSMUSG00000028458	28.46	6.72	-2.0824	3.07e-102	4.78e-101	Tesk1
ENSMUSG00000028461	32.45	74.23	1.19378	7.6e-43	5.06e-42	Ccdc107
ENSMUSG00000028464	0.13	0.98	2.91427	0.00131833	0.00241645	Tpm2
ENSMUSG00000028465	223.96	67.01	-1.74079	0	0	Tln1
ENSMUSG00000028467	4.62	2.23	-1.05085	1.63e-07	3.88e-07	Gba2
ENSMUSG00000028468	17.64	4.31	-2.03309	4.5e-71	4.73e-70	Rgp1
ENSMUSG00000028470	14.68	33.51	1.19074	1.98e-14	6.41e-14	Hint2
ENSMUSG00000028495	2019.41	4064.47	1.00913	0	0	Rps6
ENSMUSG00000028514	6.48	2.37	-1.45111	5.72e-59	5.07e-58	Usp24
ENSMUSG00000028524	0.36	0.001	-8.49185	0.00097925	0.00181543	Sgip1
ENSMUSG00000028525	1.67	4.43	1.40746	1.23e-21	4.97e-21	Pde4b
ENSMUSG00000028542	7.59	2.05	-1.88848	7.49e-28	3.55e-27	Slc6a9
ENSMUSG00000028549	2.41	6.1	1.33978	0.000460761	0.000879063	Itgb3bp
ENSMUSG00000028555	3.99	0.58	-2.78226	9.6e-17	3.38e-16	Ttc39a
ENSMUSG00000028578	1.87	4.59	1.29546	1.61e-08	4.03e-08	Caap1
ENSMUSG00000028580	16.93	8.27	-1.03362	1.49e-37	8.95e-37	Pum1
ENSMUSG00000028581	635.21	241.6	-1.39461	0	0	Laptm5
ENSMUSG00000028583	0.19	1.42	2.90182	1.99e-08	4.96e-08	Pdpn
ENSMUSG00000028587	5.61	1.89	-1.56961	7.72e-15	2.54e-14	Orc1
ENSMUSG00000028599	18.16	51.28	1.49763	1.49e-170	4.21e-169	Tnfrsf1b
ENSMUSG00000028609	74.06	170.96	1.20689	3.87e-73	4.22e-72	Magoh
ENSMUSG00000028613	30.89	6.71	-2.20276	1.39e-83	1.74e-82	Lrp8
ENSMUSG00000028621	17.81	6.93	-1.36176	4.8e-09	1.24e-08	Cyb5rl
ENSMUSG00000028643	29.19	65.27	1.16095	1.06e-30	5.42e-30	Svbp
ENSMUSG00000028644	1.09	0.13	-3.06774	6.23e-12	1.83e-11	Ermap
ENSMUSG00000028648	73.29	148.7	1.02072	1.37e-38	8.41e-38	Ndufs5
ENSMUSG00000028656	725.19	209.95	-1.78831	0	0	Cap1
ENSMUSG00000028668	16.82	7.86	-1.09758	7.71e-44	5.25e-43	Tceb3
ENSMUSG00000028678	22.2	6.74	-1.71974	1.22e-60	1.11e-59	Kif2c
ENSMUSG00000028687	7.74	3.49	-1.14911	2.92e-08	7.2e-08	Mutyh
ENSMUSG00000028691	932.71	1871.64	1.0048	0	0	Prdx1
ENSMUSG00000028702	29.31	7.9	-1.89147	3.55e-106	5.72e-105	Rad54l
ENSMUSG00000028708	15.61	4.91	-1.66868	1.24e-30	6.3e-30	Mknk1
ENSMUSG00000028718	4.66	1.27	-1.8755	1.81e-32	9.66e-32	Stil
ENSMUSG00000028729	81.38	163.93	1.01033	4.55e-101	7e-100	Ebna1bp2
ENSMUSG00000028759	73.83	22.14	-1.73755	1.32e-95	1.9e-94	Hp1bp3
ENSMUSG00000028760	24.87	11.86	-1.0683	6.24e-110	1.05e-108	Eif4g3
ENSMUSG00000028773	1.62	4.9	1.59679	2.65e-05	5.52e-05	Fabp3
ENSMUSG00000028803	10.35	1.68	-2.6231	1.44e-46	1.04e-45	Nipal3
ENSMUSG00000028807	5.93	2.67	-1.15119	7.59e-10	2.03e-09	Zbtb8a
ENSMUSG00000028809	94.88	28.2	-1.75041	1.03e-135	2.2e-134	Srrm1
ENSMUSG00000028830	17.67	7.1	-1.31541	3.19e-43	2.14e-42	AU040320
ENSMUSG00000028840	15.33	32.64	1.09028	1.94e-36	1.13e-35	Zfp593
ENSMUSG00000028854	15.74	2.63	-2.5813	5.52e-127	1.11e-125	Slc9a1
ENSMUSG00000028868	74.11	14.3	-2.37365	0	0	Wasf2
ENSMUSG00000028894	18.5	7.62	-1.27966	6e-70	6.18e-69	Inpp5b
ENSMUSG00000028898	17.41	41.81	1.26393	1.41e-26	6.51e-26	Trnau1ap
ENSMUSG00000028911	15.88	4.18	-1.92564	3.88e-42	2.56e-41	Srsf4
ENSMUSG00000028914	26.65	4.74	-2.49118	6.43e-67	6.34e-66	Casp9
ENSMUSG00000028917	17.56	4.78	-1.87721	9.5e-77	1.09e-75	Plekhm2
ENSMUSG00000028920	13.01	4.73	-1.45971	2.48e-62	2.29e-61	Fbxo42
ENSMUSG00000028926	20.07	4.71	-2.09124	9.79e-98	1.46e-96	Cdk14
ENSMUSG00000028931	120.06	49.27	-1.28497	2.79e-138	6.08e-137	Kcnab2
ENSMUSG00000028933	5.46	2.25	-1.27898	4.51e-14	1.44e-13	Xrcc2
ENSMUSG00000028936	451.93	985.26	1.12441	6.78e-198	2.37e-196	Rpl22
ENSMUSG00000028962	80.22	31.85	-1.33267	3.88e-192	1.28e-190	Slc4a2
ENSMUSG00000028965	0.39	2.98	2.93377	2.36e-14	7.6e-14	Tnfrsf9
ENSMUSG00000028967	2.68	9.37	1.80582	7.33e-32	3.86e-31	Errfi1
ENSMUSG00000028980	51.04	7.15	-2.83561	0	0	H6pd
ENSMUSG00000028982	5.93	15.67	1.4019	5.39e-26	2.45e-25	Slc25a33
ENSMUSG00000028995	4.17	1.16	-1.84592	6.9e-32	3.63e-31	Fam126a
ENSMUSG00000028998	17.47	53.73	1.62085	6.23e-62	5.75e-61	Tomm7
ENSMUSG00000028999	4.11	1.02	-2.01057	8.15e-15	2.68e-14	Rint1
ENSMUSG00000029004	2.68	0.75	-1.83727	4.32e-26	1.97e-25	Kmt2e
ENSMUSG00000029016	3.8	1.74	-1.12691	1.5e-07	3.57e-07	Clcn6
ENSMUSG00000029020	35.55	14.95	-1.2497	4.44e-92	6.12e-91	Mfn2
ENSMUSG00000029033	14.17	4.74	-1.57988	6.88e-47	4.98e-46	Acap3
ENSMUSG00000029050	29.29	11.08	-1.40245	4.38e-145	9.96e-144	Ski
ENSMUSG00000029071	18.37	8.97	-1.03417	2.86e-12	8.53e-12	Dvl1
ENSMUSG00000029075	0.61	3.16	2.37304	5.92e-08	1.44e-07	Tnfrsf4
ENSMUSG00000029094	0.001	0.11	6.78136	0.00195752	0.00353072	Afap1
ENSMUSG00000029098	16.72	2.97	-2.49304	3.09e-49	2.34e-48	Acox3
ENSMUSG00000029101	0.52	0.001	-9.02237	1.5e-11	4.34e-11	Rgs12
ENSMUSG00000029104	13.62	2.04	-2.73909	4.71e-301	2.94e-299	Htt
ENSMUSG00000029106	47.38	22.93	-1.04704	1.99e-96	2.92e-95	Add1
ENSMUSG00000029111	13.8	6.54	-1.07731	8.33e-21	3.29e-20	Nelfa
ENSMUSG00000029119	48.64	16.57	-1.55357	3.53e-140	7.81e-139	Man2b2
ENSMUSG00000029135	53.64	22.92	-1.2267	6.2e-188	2e-186	Fosl2
ENSMUSG00000029153	2.32	5.24	1.17544	1.28e-07	3.06e-07	Ociad2
ENSMUSG00000029161	0.1	5.43	5.76288	1.81e-28	8.71e-28	Cgref1
ENSMUSG00000029165	2.94	0.74	-1.99022	1.81e-07	4.27e-07	Agbl5
ENSMUSG00000029178	0.96	0.42	-1.19265	0.00522183	0.00903312	Klf3
ENSMUSG00000029185	2.72	0.67	-2.02137	3.28e-10	8.9e-10	Fam114a1
ENSMUSG00000029191	10.07	3.81	-1.4022	5.02e-28	2.39e-27	Rfc1
ENSMUSG00000029213	15.61	31.76	1.02474	2.36e-07	5.54e-07	Commd8
ENSMUSG00000029223	5.48	24.52	2.16171	2.74e-15	9.17e-15	Uchl1
ENSMUSG00000029238	3.27	1.12	-1.54579	6.35e-18	2.31e-17	Clock
ENSMUSG00000029254	8.99	20.67	1.20115	4.64e-28	2.21e-27	Stap1
ENSMUSG00000029279	0.3	0.75	1.32193	0.000771085	0.00144374	Brdt
ENSMUSG00000029283	7.3	2.68	-1.44566	3.2e-18	1.17e-17	Cdc7
ENSMUSG00000029307	1.99	0.61	-1.70589	1.56e-07	3.71e-07	Dmp1
ENSMUSG00000029313	16.28	5.21	-1.64375	5.07e-96	7.36e-95	Aff1
ENSMUSG00000029314	0.44	3.16	2.84435	8.1e-20	3.12e-19	Agpat9
ENSMUSG00000029345	26.71	9.32	-1.51898	1.81e-85	2.3e-84	Tfip11
ENSMUSG00000029361	0.88	0.14	-2.65208	1.14e-14	3.73e-14	Nos1
ENSMUSG00000029364	11.49	25.64	1.15802	2.3e-38	1.41e-37	Wsb2
ENSMUSG00000029376	0.93	3	1.68966	0.00226501	0.00406837	Mthfd2l
ENSMUSG00000029378	0.06	0.63	3.39232	0.0117402	0.0195185	Areg
ENSMUSG00000029379	0.001	0.45	8.81378	0.0312734	0.0491597	Cxcl3
ENSMUSG00000029385	3.12	1.3	-1.26303	3.36e-08	8.27e-08	Ccng2
ENSMUSG00000029401	20.63	56.43	1.45172	4.96e-67	4.91e-66	Rilpl2
ENSMUSG00000029405	40.68	13.78	-1.56174	3.38e-15	1.13e-14	G3bp2
ENSMUSG00000029406	6.96	2.12	-1.71502	5.29e-37	3.12e-36	Pitpnm2
ENSMUSG00000029414	10.16	4.12	-1.30218	2.22e-71	2.35e-70	Kntc1
ENSMUSG00000029416	40.09	14.59	-1.45826	1.27e-18	4.71e-18	Slc15a4
ENSMUSG00000029428	13.8	4.74	-1.54171	7.68e-34	4.19e-33	Stx2
ENSMUSG00000029438	7.49	2.33	-1.68464	1.92e-38	1.18e-37	Bcl7a
ENSMUSG00000029440	17.19	39.34	1.19443	1.37e-39	8.56e-39	Psmd9
ENSMUSG00000029452	2.2	0.88	-1.32193	1.2e-06	2.71e-06	Tmem116
ENSMUSG00000029461	12	2.04	-2.55639	1.1e-46	7.91e-46	Fam168a
ENSMUSG00000029467	123.08	61.05	-1.01153	2.92e-175	8.45e-174	Atp2a2
ENSMUSG00000029471	30.5	12.41	-1.29731	2.43e-58	2.13e-57	Camkk2
ENSMUSG00000029472	128.97	44.43	-1.53743	9.09e-206	3.4e-204	Anapc5
ENSMUSG00000029475	23.56	9.54	-1.30428	4.78e-79	5.61e-78	Kdm2b
ENSMUSG00000029478	67.45	27.22	-1.30915	8.28e-205	3.07e-203	Ncor2
ENSMUSG00000029484	4.33	10.84	1.32393	4.75e-13	1.46e-12	Anxa3
ENSMUSG00000029501	11.47	3.85	-1.57494	2.65e-28	1.27e-27	Ankle2
ENSMUSG00000029502	12.52	3.13	-2	3.75e-58	3.28e-57	Golga3
ENSMUSG00000029505	18.45	3.11	-2.56863	2.81e-192	9.32e-191	Ep400
ENSMUSG00000029512	7.75	1.44	-2.42813	5.52e-49	4.15e-48	Ulk1
ENSMUSG00000029516	7.36	1	-2.87971	2.31e-62	2.13e-61	Cit
ENSMUSG00000029521	7.31	1.67	-2.13002	1.29e-23	5.5e-23	Chek2
ENSMUSG00000029528	88.81	32.45	-1.4525	4.81e-201	1.73e-199	Pxn
ENSMUSG00000029530	0.001	0.19	7.56986	0.0156414	0.0256236	Ccr9
ENSMUSG00000029534	16.43	34.17	1.0564	3.01e-14	9.69e-14	St7
ENSMUSG00000029551	38.8	88.55	1.19044	7.5e-47	5.42e-46	Psmg3
ENSMUSG00000029554	29.2	13.53	-1.10981	2.78e-49	2.11e-48	Mad1l1
ENSMUSG00000029577	24.61	8.38	-1.55422	1.65e-147	3.84e-146	Ube3b
ENSMUSG00000029591	30.98	4.99	-2.63423	6.26e-82	7.66e-81	Ung
ENSMUSG00000029596	1.62	5.07	1.64599	2.28e-08	5.67e-08	Sdsl
ENSMUSG00000029598	46.14	18.25	-1.33812	5.21e-53	4.17e-52	Plbd2
ENSMUSG00000029599	47.93	18.44	-1.37809	2.63e-151	6.34e-150	Ddx54
ENSMUSG00000029613	19.72	9.52	-1.05063	8.85e-44	6.01e-43	Eif2ak1
ENSMUSG00000029624	9.2	4.49	-1.03492	5.62e-16	1.93e-15	Ptcd1
ENSMUSG00000029638	0.3	0.001	-8.22882	0.0156414	0.0256236	Glcci1
ENSMUSG00000029642	124.78	279	1.16088	6.5e-167	1.76e-165	Polr1d
ENSMUSG00000029647	10.14	5.05	-1.0057	5.1e-12	1.51e-11	Pan3
ENSMUSG00000029674	7.8	1.37	-2.5093	6.32e-28	2.99e-27	Limk1
ENSMUSG00000029676	11	4.99	-1.14039	1.41e-14	4.6e-14	Pot1a
ENSMUSG00000029703	41.59	20.5	-1.02061	1.96e-45	1.38e-44	Lrwd1
ENSMUSG00000029705	125.47	42.34	-1.56725	0	0	Cux1
ENSMUSG00000029714	9.53	1.62	-2.55648	4.07e-40	2.57e-39	Gigyf1
ENSMUSG00000029720	3.59	1.37	-1.38981	1.46e-14	4.74e-14	Gm20605
ENSMUSG00000029722	24.57	9.64	-1.34979	3.27e-56	2.76e-55	Agfg2
ENSMUSG00000029725	11.87	25.86	1.1234	1.04e-12	3.15e-12	Ppp1r35
ENSMUSG00000029730	196.75	67.59	-1.54148	1.64e-207	6.26e-206	Mcm7
ENSMUSG00000029763	9.16	3.92	-1.22449	1.32e-32	7.06e-32	Exoc4
ENSMUSG00000029772	13.67	5.44	-1.32933	8.06e-12	2.36e-11	Ahcyl2
ENSMUSG00000029787	2.58	1.08	-1.25634	1.1e-12	3.34e-12	Avl9
ENSMUSG00000029804	47	13.29	-1.82232	4.09e-114	7.14e-113	Herc3
ENSMUSG00000029815	11.12	31.37	1.49623	1.83e-29	9.05e-29	Malsu1
ENSMUSG00000029819	3.67	15.72	2.09875	1.12e-14	3.65e-14	Npy
ENSMUSG00000029821	9.61	4.05	-1.24661	1.72e-06	3.85e-06	Dfna5
ENSMUSG00000029863	28.06	8.28	-1.76081	2.83e-92	3.92e-91	Casp2
ENSMUSG00000029925	6.09	2.82	-1.11075	0.00633375	0.010874	Tbxas1
ENSMUSG00000029998	19.26	5.24	-1.87797	2.45e-67	2.44e-66	Pcyox1
ENSMUSG00000030032	2.69	6.3	1.22775	4.31e-05	8.84e-05	Wdr54
ENSMUSG00000030055	4.97	0.24	-4.37214	2.29e-26	1.05e-25	Rab43
ENSMUSG00000030057	352	743.39	1.07854	5.93899846645918e-315	4.21279448596535e-313	Cnbp
ENSMUSG00000030058	77.27	36.77	-1.07138	3.3e-157	8.29e-156	Copg1
ENSMUSG00000030064	27.53	3.05	-3.17412	1.29e-199	4.55e-198	Frmd4b
ENSMUSG00000030082	114.41	38.27	-1.57993	5.77e-303	3.69e-301	Sec61a1
ENSMUSG00000030083	13.27	5.49	-1.27329	3.8e-06	8.32e-06	Abtb1
ENSMUSG00000030084	7.54	1.91	-1.98099	2.19e-60	1.98e-59	Plxna1
ENSMUSG00000030091	32.65	6.45	-2.33971	6.79e-293	4.06e-291	Nup210
ENSMUSG00000030095	75.86	36.56	-1.05307	3.99e-95	5.75e-94	Tmem43
ENSMUSG00000030096	112.8	17.67	-2.67439	0	0	Slc6a6
ENSMUSG00000030102	6.03	0.95	-2.66616	5.86e-47	4.26e-46	Itpr1
ENSMUSG00000030105	135.71	63.38	-1.09843	1.56e-25	7.02e-25	Arl8b
ENSMUSG00000030124	0.73	0.001	-9.51175	0.0156414	0.0256236	Lag3
ENSMUSG00000030142	33.37	160.35	2.2646	0	0	Clec4e
ENSMUSG00000030144	182.11	431.81	1.24559	1.52e-263	7.69e-262	Clec4d
ENSMUSG00000030156	0.001	0.5	8.96578	0.00097925	0.00181543	Cd69
ENSMUSG00000030157	0.001	0.69	9.43045	0.00097925	0.00181543	Clec2d
ENSMUSG00000030168	24.6	9.9	-1.31316	4.88e-64	4.61e-63	Adipor2
ENSMUSG00000030170	0.39	0.07	-2.47805	0.0225028	0.0361298	Wnt5b
ENSMUSG00000030172	4.25	0.79	-2.42754	2.54e-52	2.03e-51	Erc1
ENSMUSG00000030177	5.24	2.6	-1.01106	2.9e-05	6.02e-05	Ccdc77
ENSMUSG00000030188	6.39	14.73	1.20487	1.77e-08	4.41e-08	Magohb
ENSMUSG00000030201	3.56	1.47	-1.27606	3.71e-29	1.83e-28	Lrp6
ENSMUSG00000030207	2.16	0.81	-1.41504	9.57e-09	2.42e-08	Fam234b
ENSMUSG00000030213	6.66	1.75	-1.92817	3.59e-45	2.52e-44	Atf7ip
ENSMUSG00000030216	45.04	19.4	-1.21515	1.2e-74	1.35e-73	Wbp11
ENSMUSG00000030223	13.39	5.71	-1.22959	1.45e-25	6.52e-25	Ptpro
ENSMUSG00000030243	39.75	6.78	-2.5516	3.81e-39	2.35e-38	Recql
ENSMUSG00000030291	26.22	53.78	1.0364	1.73e-25	7.76e-25	Med21
ENSMUSG00000030314	29.59	12.2	-1.27823	8.67e-34	4.73e-33	Atg7
ENSMUSG00000030315	16.85	3.73	-2.1755	7.86e-55	6.48e-54	Vgll4
ENSMUSG00000030322	2.34	0.93	-1.33121	7.28e-07	1.66e-06	Mbd4
ENSMUSG00000030329	36.99	11.38	-1.70063	2.76e-93	3.86e-92	Pianp
ENSMUSG00000030330	2.49	1.16	-1.10202	0.000321103	0.000619259	Ing4
ENSMUSG00000030337	3.47	1.71	-1.02094	3.8e-10	1.03e-09	Vamp1
ENSMUSG00000030346	17.76	7.42	-1.25914	9.3e-22	3.77e-21	Rad51ap1
ENSMUSG00000030374	45.95	21.41	-1.10178	7.01e-72	7.5e-71	Strn4
ENSMUSG00000030380	1.11	0.43	-1.36815	0.000312981	0.000604225	Mzf1
ENSMUSG00000030409	49.36	14.72	-1.74556	8.15e-111	1.38e-109	Dmpk
ENSMUSG00000030433	1.59	0.2	-2.99095	4.97e-06	1.08e-05	Sbk2
ENSMUSG00000030451	6.28	1.82	-1.78683	3.1e-100	4.73e-99	Herc2
ENSMUSG00000030512	78.68	158.02	1.00604	6.01e-87	7.78e-86	Snrpa1
ENSMUSG00000030515	3.92	1.83	-1.09901	2.19e-08	5.44e-08	Tarsl2
ENSMUSG00000030522	8.39	3.01	-1.47891	2.16e-12	6.47e-12	Mtmr10
ENSMUSG00000030527	4.88	2.23	-1.12984	8.64e-15	2.83e-14	Crtc3
ENSMUSG00000030528	4.4	1.97	-1.15931	1.12e-15	3.82e-15	Blm
ENSMUSG00000030530	81.57	18.68	-2.12654	0	0	Furin
ENSMUSG00000030534	7.56	2.78	-1.4433	2.58e-20	1.01e-19	Vps33b
ENSMUSG00000030536	133.74	49.17	-1.44358	0	0	Iqgap1
ENSMUSG00000030557	31.63	13.34	-1.24553	5.41e-71	5.67e-70	Mef2a
ENSMUSG00000030583	21.26	6.32	-1.75015	1.95e-74	2.17e-73	Sipa1l3
ENSMUSG00000030589	2.6	0.73	-1.83254	3.79e-06	8.3e-06	Rasgrp4
ENSMUSG00000030592	0.26	0.71	1.44931	8.06e-11	2.25e-10	Ryr1
ENSMUSG00000030595	32.35	90.32	1.48128	1.6e-98	2.41e-97	Nfkbib
ENSMUSG00000030647	112.24	270.27	1.26781	5.1e-121	9.73e-120	Ndufc2
ENSMUSG00000030655	6.84	1.32	-2.37346	4.66e-107	7.56e-106	Smg1
ENSMUSG00000030657	4.88	1.78	-1.455	2.21e-39	1.37e-38	Xylt1
ENSMUSG00000030660	1.94	0.68	-1.51245	3.93e-21	1.56e-20	Pik3c2a
ENSMUSG00000030683	0.94	0.25	-1.91073	1.1e-06	2.49e-06	Sez6l2
ENSMUSG00000030717	15.31	31.03	1.01919	1.14e-13	3.59e-13	Nupr1
ENSMUSG00000030722	15.45	6.73	-1.19893	6.67e-14	2.12e-13	Nfatc2ip
ENSMUSG00000030726	21.08	9.07	-1.2167	2.24e-29	1.11e-28	Pold3
ENSMUSG00000030733	12.1	5.64	-1.10124	5.74e-22	2.34e-21	Sh2b1
ENSMUSG00000030745	0.74	0.001	-9.53138	2.41e-07	5.67e-07	Il21r
ENSMUSG00000030761	68.45	19.4	-1.81899	0	0	Myo7a
ENSMUSG00000030766	17.95	4.63	-1.9549	2.92e-65	2.82e-64	Arhgap17
ENSMUSG00000030768	10.88	2.71	-2.00531	9.5e-52	7.5e-51	Disp1
ENSMUSG00000030780	14.96	3.65	-2.03514	6.69e-57	5.7e-56	BC017158
ENSMUSG00000030786	26.98	8.84	-1.60977	6.25e-113	1.08e-111	Itgam
ENSMUSG00000030830	18.07	4.87	-1.8916	1.63e-109	2.74e-108	Itgal
ENSMUSG00000030835	88.41	40.13	-1.13953	1.47e-181	4.47e-180	Nomo1
ENSMUSG00000030850	8.14	3.86	-1.07643	2.94e-05	6.09e-05	Ate1
ENSMUSG00000030867	99.35	37.1	-1.4211	5.27e-154	1.29e-152	Plk1
ENSMUSG00000030872	17.35	7.79	-1.15524	1.62e-64	1.54e-63	Gga2
ENSMUSG00000030894	51.09	19.69	-1.37558	3.17e-136	6.82e-135	Tpp1
ENSMUSG00000030929	4.02	1.6	-1.32912	1.83e-11	5.24e-11	Eri2
ENSMUSG00000030956	19.13	4.93	-1.95618	4.85e-65	4.65e-64	Fam53b
ENSMUSG00000030987	13.55	2.6	-2.38171	3.39e-83	4.21e-82	Stim1
ENSMUSG00000031004	10.81	4.01	-1.43069	5.51e-88	7.25e-87	Mki67
ENSMUSG00000031016	11.69	3.37	-1.79445	2.96e-28	1.41e-27	Wee1
ENSMUSG00000031059	71.47	152.39	1.09236	2.04e-71	2.16e-70	Ndufb11
ENSMUSG00000031060	33.63	15.89	-1.08163	1.51e-51	1.18e-50	Rbm10
ENSMUSG00000031097	21.49	50.27	1.22603	1.24e-30	6.3e-30	Tnni2
ENSMUSG00000031103	16.89	4.14	-2.02847	1.17e-120	2.22e-119	Elf4
ENSMUSG00000031133	45.24	16.1	-1.49054	1.36e-123	2.64e-122	Arhgef6
ENSMUSG00000031137	19.5	6.88	-1.50299	6.98e-08	1.69e-07	Fgf13
ENSMUSG00000031150	2.76	0.56	-2.30117	0.0205321	0.033146	Ccdc120
ENSMUSG00000031165	53.56	19.24	-1.47705	8.47e-95	1.21e-93	Was
ENSMUSG00000031166	16.99	6.53	-1.37953	4.91e-14	1.57e-13	Wdr13
ENSMUSG00000031197	13.43	30.89	1.20168	4.27e-36	2.46e-35	Vbp1
ENSMUSG00000031200	2.14	0.4	-2.41954	1.43e-07	3.41e-07	Mtcp1
ENSMUSG00000031214	0.97	0.15	-2.69302	3.67e-05	7.56e-05	Ophn1
ENSMUSG00000031216	4.53	2.1	-1.10912	1.44e-12	4.35e-12	Stard8
ENSMUSG00000031229	4.89	2.08	-1.23325	4.17e-12	1.23e-11	Atrx
ENSMUSG00000031246	24.76	50.31	1.02283	2.32e-69	2.37e-68	Sh3bgrl
ENSMUSG00000031257	0.001	0.39	8.60733	0.000245094	0.000477211	Nox1
ENSMUSG00000031258	0.03	0.26	3.11548	0.0117402	0.0195185	Xkrx
ENSMUSG00000031289	2.22	11.48	2.37049	5.73e-28	2.72e-27	Il13ra2
ENSMUSG00000031295	28.29	11.18	-1.33937	7.84e-74	8.68e-73	Phka2
ENSMUSG00000031303	1.19	0.5	-1.25096	6.84e-05	0.000138643	Map3k15
ENSMUSG00000031310	12.95	5.52	-1.23021	1.99e-13	6.21e-13	Zmym3
ENSMUSG00000031347	28.99	61.03	1.07396	6.03e-37	3.54e-36	Cetn2
ENSMUSG00000031378	37.35	9.57	-1.96452	2.52e-166	6.78e-165	Abcd1
ENSMUSG00000031381	3.95	1.74	-1.18277	1.15e-05	2.46e-05	Piga
ENSMUSG00000031386	53.57	21.14	-1.34145	0	0	Hcfc1
ENSMUSG00000031391	5.81	0.73	-2.99257	8.31e-54	6.75e-53	L1cam
ENSMUSG00000031392	44.71	13.27	-1.75243	6.09e-114	1.06e-112	Irak1
ENSMUSG00000031398	1.4	0.42	-1.73697	0.00873873	0.0147551	Plxna3
ENSMUSG00000031400	179.31	82.3	-1.12349	1.96e-194	6.66e-193	G6pdx
ENSMUSG00000031425	0.001	0.33	8.36632	0.00097925	0.00181543	Plp1
ENSMUSG00000031429	31.94	84.25	1.39931	5.51e-93	7.69e-92	Psmd10
ENSMUSG00000031445	0.43	0.03	-3.8413	0.000980413	0.00181707	Proz
ENSMUSG00000031453	43.03	11.64	-1.88625	6.06e-290	3.53e-288	Rasa3
ENSMUSG00000031511	62.79	16.95	-1.88925	0	0	Arhgef7
ENSMUSG00000031520	18.53	45.39	1.29251	7.51e-61	6.83e-60	Vegfc
ENSMUSG00000031529	3.18	0.32	-3.31288	5.38e-51	4.19e-50	Tnks
ENSMUSG00000031538	0.41	0.96	1.22741	0.0114445	0.0190805	Plat
ENSMUSG00000031540	6.29	1.43	-2.13704	8.37e-66	8.1e-65	Kat6a
ENSMUSG00000031557	97.3	33.33	-1.54562	2.5e-115	4.43e-114	Plekha2
ENSMUSG00000031562	25.21	8.72	-1.5316	1.02e-20	4.03e-20	Dctd
ENSMUSG00000031583	1	0.23	-2.12029	4.22e-11	1.19e-10	Wrn
ENSMUSG00000031584	90.88	30.71	-1.56525	1.54e-53	1.24e-52	Gsr
ENSMUSG00000031592	2.04	0.98	-1.05772	1.35e-10	3.72e-10	Pcm1
ENSMUSG00000031596	0.1	0.29	1.53605	0.00144222	0.00263645	Slc7a2
ENSMUSG00000031600	1.62	4.14	1.35364	3.28e-22	1.35e-21	Vps37a
ENSMUSG00000031601	18.8	41.99	1.15931	3.16e-20	1.23e-19	Cnot7
ENSMUSG00000031613	0.73	0.04	-4.18982	0.000145836	0.000289155	Hpgd
ENSMUSG00000031627	15.46	5.02	-1.62278	3.34e-25	1.49e-24	Irf2
ENSMUSG00000031631	2.89	1.19	-1.28011	6.88e-06	1.48e-05	Cfap97
ENSMUSG00000031639	1.18	0.48	-1.29768	4.49e-05	9.19e-05	Tlr3
ENSMUSG00000031642	1.92	0.7	-1.45568	4.44e-10	1.2e-09	Sh3rf1
ENSMUSG00000031647	2.3	7.17	1.64034	2.19e-34	1.21e-33	Mfap3l
ENSMUSG00000031652	6.86	2.59	-1.40526	1.11e-37	6.64e-37	N4bp1
ENSMUSG00000031659	107.3	17.52	-2.61458	0	0	Adcy7
ENSMUSG00000031666	3.11	1.07	-1.5393	5.47e-14	1.74e-13	Rbl2
ENSMUSG00000031668	8.82	3.51	-1.32931	8.2e-35	4.59e-34	Eif2ak3
ENSMUSG00000031683	50.47	102.06	1.01592	4.02e-24	1.74e-23	Lsm6
ENSMUSG00000031691	15.99	6.87	-1.21879	8.24e-51	6.4e-50	Tnpo2
ENSMUSG00000031700	9.06	4.28	-1.0819	7.38e-19	2.77e-18	Gpt2
ENSMUSG00000031712	0.23	1.75	2.92765	3.36e-08	8.27e-08	Il15
ENSMUSG00000031732	1.7	0.46	-1.88583	1.64e-15	5.54e-15	Phlpp2
ENSMUSG00000031749	13.85	3.9	-1.82834	2.32e-67	2.31e-66	St3gal2
ENSMUSG00000031750	1.45	3.63	1.32392	0.000230667	0.000449931	Il34
ENSMUSG00000031753	19.48	8.11	-1.26422	6.98e-31	3.59e-30	Cog4
ENSMUSG00000031756	23.91	11.18	-1.09669	6.89e-25	3.05e-24	Cenpn
ENSMUSG00000031762	51.09	464.38	3.18419	0	0	Mt2
ENSMUSG00000031765	178.96	708.34	1.9848	0	0	Mt1
ENSMUSG00000031779	0.37	8.37	4.49963	1.97e-59	1.76e-58	Ccl22
ENSMUSG00000031803	6.17	1.88	-1.71454	6.83e-16	2.34e-15	B3gnt3
ENSMUSG00000031805	5.58	2.7	-1.04731	1.53e-13	4.78e-13	Jak3
ENSMUSG00000031818	513.2	1100.48	1.10054	4.66e-278	2.54e-276	Cox4i1
ENSMUSG00000031822	17.81	3.1	-2.52235	6.13e-116	1.1e-114	Gse1
ENSMUSG00000031833	18.23	5.3	-1.78225	4.56e-109	7.6e-108	Mast3
ENSMUSG00000031834	34.06	14.72	-1.2103	1.56e-70	1.63e-69	Pik3r2
ENSMUSG00000031835	44.22	18.19	-1.28155	1.85e-126	3.68e-125	Mbtps1
ENSMUSG00000031848	124.95	266.43	1.09241	1.12e-120	2.13e-119	Lsm4
ENSMUSG00000031849	0.37	0.03	-3.62449	0.0034275	0.00604598	Comp
ENSMUSG00000031858	12.4	5.35	-1.21273	8.7e-44	5.91e-43	Mau2
ENSMUSG00000031862	34.97	14.99	-1.22212	2.05e-84	2.58e-83	Atp13a1
ENSMUSG00000031865	70.21	28.14	-1.31905	1.18e-158	2.98e-157	Dctn1
ENSMUSG00000031880	4.85	1.54	-1.65505	2.43e-09	6.34e-09	Rrad
ENSMUSG00000031897	34.92	73.63	1.07624	2.03e-49	1.54e-48	Psmb10
ENSMUSG00000031898	0.001	0.27	8.07682	0.0312734	0.0491597	Dpep3
ENSMUSG00000031902	11.41	4.44	-1.36167	1.22e-53	9.88e-53	Nfatc3
ENSMUSG00000031910	0.16	0.01	-4	0.00183717	0.00332429	Has3
ENSMUSG00000031918	33.56	14.97	-1.16467	7.2e-40	4.52e-39	Mtmr2
ENSMUSG00000031939	14.19	29.21	1.04159	5.64e-21	2.24e-20	Taf1d
ENSMUSG00000031950	48.41	99.61	1.04099	3.28e-56	2.76e-55	Gabarapl2
ENSMUSG00000031951	2.98	0.9	-1.72732	4.42e-11	1.24e-10	Tmem231
ENSMUSG00000031963	0.001	0.12	6.90689	0.0312734	0.0491597	Bmper
ENSMUSG00000031970	0.52	0.05	-3.37851	0.0117402	0.0195185	Dbndd1
ENSMUSG00000031971	3.29	1.41	-1.22239	1.93e-06	4.29e-06	Ccsap
ENSMUSG00000031974	1.5	0.53	-1.5009	3.97e-07	9.21e-07	Abcb10
ENSMUSG00000031976	7.54	2.55	-1.56407	1.49e-44	1.03e-43	Urb2
ENSMUSG00000031983	5.08	2.03	-1.32335	2.2e-14	7.1e-14	2310022B05Rik
ENSMUSG00000031986	5.47	0.4	-3.77347	1.81e-33	9.79e-33	Sprtn
ENSMUSG00000031993	18.15	8.97	-1.01679	5.99e-48	4.41e-47	Snx19
ENSMUSG00000031995	3.02	1.26	-1.26112	2.84e-08	7.02e-08	St14
ENSMUSG00000032010	30.26	13.01	-1.21779	2.71e-29	1.34e-28	Usp2
ENSMUSG00000032012	39.28	12.91	-1.60531	1.35e-176	3.95e-175	Pvrl1
ENSMUSG00000032014	0.03	1.59	5.72792	4.9e-14	1.56e-13	Oaf
ENSMUSG00000032020	29.19	7.01	-2.05799	9.21e-67	9.05e-66	Ubash3b
ENSMUSG00000032021	0.001	0.55	9.10329	0.00195752	0.00353072	Crtam
ENSMUSG00000032041	10.51	1.7	-2.62816	5.33e-50	4.09e-49	Tirap
ENSMUSG00000032068	0.09	3.33	5.20945	4.53e-20	1.76e-19	Plet1
ENSMUSG00000032086	1.02	0.06	-4.08746	9.67e-13	2.94e-12	Bace1
ENSMUSG00000032096	74.2	33.61	-1.14253	6.29e-132	1.32e-130	Arcn1
ENSMUSG00000032097	25.77	12.7	-1.02086	2.11e-73	2.31e-72	Ddx6
ENSMUSG00000032109	15.22	5.96	-1.35258	2.57e-43	1.73e-42	Nlrx1
ENSMUSG00000032112	50.57	110.78	1.13134	3.87e-71	4.08e-70	Trappc4
ENSMUSG00000032115	150.86	64.63	-1.22293	1.05e-263	5.37e-262	Hyou1
ENSMUSG00000032119	15.08	7.13	-1.08066	1.1e-18	4.1e-18	Hinfp
ENSMUSG00000032131	0.3	0.03	-3.32193	0.0215151	0.0346039	Abcg4
ENSMUSG00000032175	14.26	4.08	-1.80533	2.3e-77	2.64e-76	Tyk2
ENSMUSG00000032177	9.74	2.28	-2.09489	4.14e-57	3.53e-56	Pde4a
ENSMUSG00000032178	46.58	20.28	-1.19965	4.78e-97	7.03e-96	Ilf3
ENSMUSG00000032185	49.49	11.09	-2.15788	9.25e-219	3.85e-217	Carm1
ENSMUSG00000032187	88.84	25.26	-1.81435	0	0	Smarca4
ENSMUSG00000032192	4.62	2.18	-1.08356	0.00033793	0.000650744	Gnb5
ENSMUSG00000032193	83.41	21.53	-1.95387	0	0	Ldlr
ENSMUSG00000032194	5.87	1.63	-1.84849	1.92e-36	1.11e-35	Kank2
ENSMUSG00000032198	3.71	0.97	-1.93536	3.64e-33	1.96e-32	Dock6
ENSMUSG00000032202	3.41	1.13	-1.59345	2.12e-12	6.38e-12	Rab27a
ENSMUSG00000032228	30.31	8.56	-1.82411	1.18e-74	1.32e-73	Tcf12
ENSMUSG00000032245	63.2	22.36	-1.499	1.32e-90	1.8e-89	Cln6
ENSMUSG00000032253	1.64	0.76	-1.10962	9.82e-10	2.61e-09	Phip
ENSMUSG00000032254	21.67	9.4	-1.20497	8.76e-48	6.42e-47	Kif23
ENSMUSG00000032258	1.84	0.64	-1.52356	5.03e-06	1.09e-05	Lca5
ENSMUSG00000032280	14.55	6.49	-1.16473	1.31e-20	5.14e-20	Tle3
ENSMUSG00000032300	66.48	22.62	-1.55532	2.59e-274	1.39e-272	1700017B05Rik
ENSMUSG00000032329	13.52	5.21	-1.37574	9.11e-41	5.8e-40	Hmg20a
ENSMUSG00000032330	125.12	256.93	1.03806	1.08e-90	1.47e-89	Cox7a2
ENSMUSG00000032350	42.73	12.42	-1.78258	9.44e-158	2.38e-156	Gclc
ENSMUSG00000032373	4.48	1.81	-1.30751	2.41e-14	7.76e-14	Car12
ENSMUSG00000032375	1.95	0.58	-1.74935	2.06e-07	4.85e-07	Aph1b
ENSMUSG00000032387	0.5	2.7	2.43296	2.44e-10	6.65e-10	Rbpms2
ENSMUSG00000032393	27.64	11.68	-1.24272	1.72e-75	1.95e-74	Dpp8
ENSMUSG00000032396	12.18	4.78	-1.34943	2.29e-33	1.24e-32	Dis3l
ENSMUSG00000032402	3.75	0.84	-2.15843	1.32e-16	4.61e-16	Smad3
ENSMUSG00000032403	2.42	5.18	1.09795	0.0152899	0.0251334	2300009A05Rik
ENSMUSG00000032409	2.17	0.98	-1.14684	8.93e-12	2.6e-11	Atr
ENSMUSG00000032410	2.12	0.68	-1.64046	6.23e-21	2.47e-20	Xrn1
ENSMUSG00000032411	7	2.9	-1.2713	4.35e-15	1.44e-14	Tfdp2
ENSMUSG00000032413	12.44	4.4	-1.49941	1.53e-38	9.37e-38	Rasa2
ENSMUSG00000032420	2.54	0.89	-1.51295	7.41e-11	2.07e-10	Nt5e
ENSMUSG00000032425	0.6	1.94	1.69302	0.0222878	0.0358156	Zfp949
ENSMUSG00000032440	36.48	9.04	-2.01271	7.01e-217	2.86e-215	Tgfbr2
ENSMUSG00000032477	20.59	9.67	-1.09036	8.38e-38	5.05e-37	Cdc25a
ENSMUSG00000032479	39.29	18.67	-1.07344	6.25e-95	8.97e-94	Map4
ENSMUSG00000032481	26.87	9.04	-1.5716	5.57e-93	7.77e-92	Smarcc1
ENSMUSG00000032485	40.13	15.43	-1.37894	2.57e-88	3.38e-87	Scap
ENSMUSG00000032487	5.66	29.4	2.37694	1.57e-209	6.04e-208	Ptgs2
ENSMUSG00000032489	0.27	0.03	-3.16993	0.0117402	0.0195185	Kif9
ENSMUSG00000032498	12.26	5.07	-1.2739	7.91e-23	3.31e-22	Mlh1
ENSMUSG00000032502	0.2	1.24	2.63227	9.67e-07	2.19e-06	Stac
ENSMUSG00000032512	18.47	8.65	-1.09441	1.47e-39	9.18e-39	Wdr48
ENSMUSG00000032513	8.76	3.48	-1.33184	1.12e-24	4.92e-24	Gorasp1
ENSMUSG00000032525	7.87	2.95	-1.41565	2.01e-35	1.14e-34	Nktr
ENSMUSG00000032526	11.62	24.41	1.07086	2.88e-08	7.12e-08	Deb1
ENSMUSG00000032528	1.15	0.09	-3.67557	7.93e-14	2.51e-13	Vipr1
ENSMUSG00000032536	9.66	2.18	-2.1477	3.36e-71	3.54e-70	Trak1
ENSMUSG00000032551	3.16	8.92	1.49712	1.78e-05	3.74e-05	1110059G10Rik
ENSMUSG00000032555	25.96	6.42	-2.01565	5.11e-108	8.38e-107	Topbp1
ENSMUSG00000032558	1.94	0.86	-1.17365	0.00011768	0.000234654	Nphp3
ENSMUSG00000032560	5.42	1.83	-1.56645	2.48e-41	1.6e-40	Dnajc13
ENSMUSG00000032571	8.97	2.55	-1.81461	2.22e-38	1.35e-37	Pik3r4
ENSMUSG00000032578	0.001	0.96	9.90689	3e-11	8.52e-11	Cish
ENSMUSG00000032579	5.01	10.9	1.12145	0.000255274	0.000496436	Hemk1
ENSMUSG00000032589	1.89	0.38	-2.31431	2.76e-38	1.68e-37	Bsn
ENSMUSG00000032594	22.48	9.39	-1.25944	1.53e-24	6.68e-24	Ip6k1
ENSMUSG00000032598	6.77	3	-1.17419	1.04e-14	3.4e-14	Nckipsd
ENSMUSG00000032601	20.44	6.26	-1.70716	3.55e-58	3.11e-57	Prkar2a
ENSMUSG00000032606	11.27	4.49	-1.3277	4.1e-05	8.41e-05	Nicn1
ENSMUSG00000032637	60.47	16.12	-1.90737	2.03e-284	1.15e-282	Atxn2l
ENSMUSG00000032661	34.46	10.83	-1.66989	5.41e-156	1.35e-154	Oas3
ENSMUSG00000032712	3.13	1.04	-1.58958	3.38e-11	9.57e-11	2810474O19Rik
ENSMUSG00000032724	0.99	2.1	1.08489	7.67e-07	1.75e-06	Abtb2
ENSMUSG00000032737	35.85	13.13	-1.44911	9.38e-156	2.33e-154	Inppl1
ENSMUSG00000032740	2.38	0.54	-2.13993	3.99e-08	9.79e-08	Ccdc88a
ENSMUSG00000032741	72.43	12.73	-2.50835	0	0	Tpcn1
ENSMUSG00000032743	3.5	1.03	-1.76471	1.24e-32	6.62e-32	D430042O09Rik
ENSMUSG00000032777	18.23	4.11	-2.1491	1.12e-150	2.68e-149	Gtf3c1
ENSMUSG00000032782	9.78	2.66	-1.87841	1.89e-30	9.56e-30	Cntrob
ENSMUSG00000032783	21.69	8.63	-1.3296	3.72e-38	2.25e-37	Troap
ENSMUSG00000032815	15.83	3.75	-2.0777	3.81e-108	6.28e-107	Fanca
ENSMUSG00000032826	2.69	0.8	-1.74953	1.38e-15	4.66e-15	Ank2
ENSMUSG00000032845	0.001	0.08	6.32193	0.00782344	0.0132718	Alpk2
ENSMUSG00000032846	2.64	1.16	-1.18641	9.14e-11	2.54e-10	Zswim6
ENSMUSG00000032850	1.42	0.7	-1.02046	0.000110675	0.000221333	Rnft2
ENSMUSG00000032855	9.56	1.47	-2.70119	1.3e-249	6.28e-248	Pkd1
ENSMUSG00000032867	30.62	12.06	-1.34424	5.38e-103	8.41e-102	Fbxw8
ENSMUSG00000032898	12.53	6.06	-1.048	2.87e-26	1.32e-25	Fbxo21
ENSMUSG00000032911	2.6	0.76	-1.77444	7.86e-26	3.56e-25	Cspg4
ENSMUSG00000032913	2.08	0.89	-1.22471	6.1e-07	1.4e-06	Lrig2
ENSMUSG00000032998	9.41	4.35	-1.11318	1.93e-28	9.27e-28	Foxj3
ENSMUSG00000033009	10.32	4.91	-1.07165	1.37e-10	3.8e-10	Ogfod1
ENSMUSG00000033016	345.7	127.62	-1.43767	0	0	Nfatc1
ENSMUSG00000033020	96.7	203.45	1.07309	4.04e-57	3.46e-56	Polr2f
ENSMUSG00000033029	0.94	0.28	-1.74723	0.00444281	0.00773965	1700088E04Rik
ENSMUSG00000033033	18.21	6.93	-1.3938	1.34e-37	8.03e-37	Calhm2
ENSMUSG00000033054	3.77	1.53	-1.30103	2.44e-18	9e-18	Npat
ENSMUSG00000033066	14.49	6.18	-1.22938	1.8e-22	7.44e-22	Gas7
ENSMUSG00000033075	16.22	7.47	-1.11859	2.67e-53	2.14e-52	Senp1
ENSMUSG00000033083	2.33	0.91	-1.35639	5.3e-16	1.82e-15	Tbc1d4
ENSMUSG00000033088	10.09	3.95	-1.353	7.17e-22	2.91e-21	Triobp
ENSMUSG00000033124	14.99	0.99	-3.92043	5.86e-120	1.11e-118	Atg9a
ENSMUSG00000033209	0.25	0.05	-2.32193	5.7e-10	1.53e-09	Ttc28
ENSMUSG00000033222	22.14	4.32	-2.35755	2.21e-160	5.68e-159	Ttf2
ENSMUSG00000033228	7.65	3.46	-1.14469	9.16e-36	5.25e-35	Scaf11
ENSMUSG00000033253	6.27	2.25	-1.47854	7.46e-98	1.11e-96	Szt2
ENSMUSG00000033272	200.8	87.39	-1.20022	1.71e-29	8.47e-29	Slc35a4
ENSMUSG00000033282	0.35	0.14	-1.32193	0.00457933	0.00796626	Rpgrip1l
ENSMUSG00000033287	27.95	12.1	-1.20784	5.98e-21	2.37e-20	Kctd17
ENSMUSG00000033306	0.3	0.12	-1.32193	2.88e-05	5.97e-05	Lpp
ENSMUSG00000033327	0.04	0.001	-5.32193	0.0156414	0.0256236	Tnxb
ENSMUSG00000033335	64.58	24.64	-1.39009	4.94e-186	1.56e-184	Dnm2
ENSMUSG00000033364	3.79	1.21	-1.64719	1.87e-19	7.15e-19	Usp37
ENSMUSG00000033382	6.47	3.03	-1.09445	2.07e-20	8.08e-20	Trappc8
ENSMUSG00000033396	5.62	1.97	-1.51237	3.58e-35	2.02e-34	Spg11
ENSMUSG00000033400	12.95	4.72	-1.45609	6.89e-50	5.27e-49	Agl
ENSMUSG00000033411	7.85	2.07	-1.92306	6.71e-21	2.65e-20	Ctdspl2
ENSMUSG00000033416	12.28	5.06	-1.2791	1.47e-16	5.16e-16	Gucd1
ENSMUSG00000033444	13.44	5.62	-1.25789	9.95e-56	8.31e-55	Specc1l
ENSMUSG00000033458	1.12	0.4	-1.48543	9.01e-05	0.000181037	Fan1
ENSMUSG00000033475	122.7	286.97	1.22576	9.76e-130	2.01e-128	Tomm6
ENSMUSG00000033499	12.41	6.05	-1.0365	2.3e-12	6.91e-12	Larp4b
ENSMUSG00000033526	16.05	3.77	-2.08994	3.81e-80	4.54e-79	Ppip5k1
ENSMUSG00000033538	1.54	10.84	2.81536	5.97e-19	2.24e-18	Casp4
ENSMUSG00000033540	6.92	1.71	-2.01678	1.3e-28	6.3e-28	Idua
ENSMUSG00000033545	10.46	25.92	1.30918	4.82e-25	2.14e-24	Znrf1
ENSMUSG00000033557	11.65	5.73	-1.02372	1.5e-25	6.74e-25	Fam20b
ENSMUSG00000033565	3.82	1.44	-1.4075	1.2e-22	4.98e-22	Rbfox2
ENSMUSG00000033581	4.34	8.77	1.01488	8.02e-15	2.64e-14	Igf2bp2
ENSMUSG00000033596	43.7	15.14	-1.52927	5.07e-161	1.3e-159	Rfwd3
ENSMUSG00000033610	2.65	1.17	-1.17948	5.9e-07	1.35e-06	Pank1
ENSMUSG00000033618	0.15	0.001	-7.22882	0.000122627	0.000244069	Map3k13
ENSMUSG00000033624	6.75	0.23	-4.87518	1.23e-80	1.48e-79	Pdpr
ENSMUSG00000033671	2.74	0.86	-1.67177	1.46e-10	4.04e-10	Cep350
ENSMUSG00000033685	2045.68	621.15	-1.71957	0	0	Ucp2
ENSMUSG00000033703	5.87	2.63	-1.1583	2.45e-15	8.23e-15	Fuk
ENSMUSG00000033705	4.82	0.77	-2.6461	3.58e-123	6.94e-122	Stard9
ENSMUSG00000033712	30.08	9.37	-1.68268	3.87e-114	6.78e-113	Ccar2
ENSMUSG00000033713	1.55	0.58	-1.41814	1.43e-09	3.77e-09	Foxn3
ENSMUSG00000033720	2.59	1.06	-1.28889	2.14e-11	6.12e-11	Sfxn5
ENSMUSG00000033730	0.94	0.21	-2.16227	0.00436394	0.00760891	Egr3
ENSMUSG00000033732	130.91	60.47	-1.11428	1.4e-225	5.98e-224	Sf3b3
ENSMUSG00000033740	2.45	0.92	-1.41308	0.00688766	0.0117783	St18
ENSMUSG00000033752	15	30.59	1.0281	4.52e-15	1.5e-14	Mnd1
ENSMUSG00000033762	10.63	2.64	-2.00953	4.46e-58	3.89e-57	Recql4
ENSMUSG00000033767	13.23	6.45	-1.03644	2.39e-24	1.04e-23	D930015E06Rik
ENSMUSG00000033769	7.39	2.39	-1.62856	8.69e-58	7.51e-57	Exoc6b
ENSMUSG00000033777	15.33	2.96	-2.37269	2.98e-104	4.74e-103	Tlr13
ENSMUSG00000033792	2.04	0.05	-5.3505	1.46e-35	8.3e-35	Atp7a
ENSMUSG00000033809	46	21.61	-1.08993	5.79e-26	2.63e-25	Alg3
ENSMUSG00000033855	8.35	0.76	-3.4577	1.86e-41	1.2e-40	Ston1
ENSMUSG00000033863	1.73	0.68	-1.34717	7.77e-06	1.67e-05	Klf9
ENSMUSG00000033885	21	5.93	-1.82429	5.41e-71	5.67e-70	Pxk
ENSMUSG00000033902	2.62	0.68	-1.94596	1.14e-21	4.61e-21	Mapkbp1
ENSMUSG00000033916	116.73	252.37	1.11237	3.93e-119	7.33e-118	Chmp2a
ENSMUSG00000033938	120.44	295.84	1.2965	8.98e-125	1.77e-123	Ndufb7
ENSMUSG00000033943	3.69	0.57	-2.69459	4.34e-26	1.98e-25	Mga
ENSMUSG00000033955	5.01	1.32	-1.92427	0.000187157	0.000367936	Tnks1bp1
ENSMUSG00000033964	2.9	0.96	-1.59495	0.000422415	0.000807803	Zbtb41
ENSMUSG00000033966	0.43	0.08	-2.42626	0.00258886	0.00462446	Cdkl4
ENSMUSG00000033991	2.44	0.96	-1.34577	1.11e-11	3.24e-11	Ttc37
ENSMUSG00000034006	41.4	82.94	1.00244	5.51e-72	5.91e-71	Pqlc1
ENSMUSG00000034007	0.6	0.19	-1.65896	0.000115997	0.000231406	Scaper
ENSMUSG00000034022	42.3	19.82	-1.0937	1.02e-97	1.51e-96	Cpsf1
ENSMUSG00000034023	11.84	2.46	-2.26694	1.32e-87	1.73e-86	Fancd2
ENSMUSG00000034032	15.16	4	-1.9222	6.75e-95	9.66e-94	Rpap1
ENSMUSG00000034055	4.11	1.23	-1.74048	3.33e-26	1.52e-25	Phka1
ENSMUSG00000034066	1.66	0.52	-1.6746	5.66e-07	1.3e-06	Farp2
ENSMUSG00000034075	29.81	7.75	-1.94353	4.38e-171	1.24e-169	Zdhhc5
ENSMUSG00000034088	121.94	48.29	-1.33638	5.95e-266	3.08e-264	Hdlbp
ENSMUSG00000034101	50.08	15.83	-1.66157	6.1e-222	2.58e-220	Ctnnd1
ENSMUSG00000034111	3.93	1.03	-1.93188	3.17e-38	1.93e-37	Tmed8
ENSMUSG00000034126	8.88	4.13	-1.10442	1.13e-26	5.21e-26	Pomt2
ENSMUSG00000034154	5.63	2.31	-1.28524	4.11e-27	1.92e-26	Ino80
ENSMUSG00000034157	15.2	7.27	-1.06404	2.48e-11	7.07e-11	Cipc
ENSMUSG00000034165	61.66	25.47	-1.27554	1.07e-79	1.27e-78	Ccnd3
ENSMUSG00000034168	38.18	16.7	-1.19297	3.66e-96	5.33e-95	Irf2bpl
ENSMUSG00000034171	0.87	0.36	-1.27302	0.000914567	0.00170305	Faah
ENSMUSG00000034187	48.77	14.39	-1.76093	2.24e-184	6.99e-183	Nsf
ENSMUSG00000034201	37.54	15.17	-1.30721	4.76e-39	2.94e-38	Gas2l1
ENSMUSG00000034235	1.93	0.92	-1.0689	5.58e-09	1.43e-08	Usp54
ENSMUSG00000034245	0.43	0.11	-1.96683	0.0309574	0.0488402	Hdac11
ENSMUSG00000034247	45.52	7.44	-2.61313	0	0	Plekhm1
ENSMUSG00000034255	47.94	5.57	-3.10548	6.12352372440329e-318	4.49093004226534e-316	Arhgap27
ENSMUSG00000034265	4.19	1.17	-1.84044	1.93e-17	6.92e-17	Zdhhc14
ENSMUSG00000034269	18.17	6.82	-1.41371	5.56e-116	9.97e-115	Setd5
ENSMUSG00000034271	101.04	235.3	1.21957	1.52e-194	5.15e-193	Jdp2
ENSMUSG00000034290	43.02	14.5	-1.56895	4.62e-211	1.8e-209	Nek9
ENSMUSG00000034297	4.89	2.03	-1.26835	6.49e-25	2.87e-24	Med13
ENSMUSG00000034300	12.54	4.04	-1.63411	3.19e-54	2.62e-53	Fam53c
ENSMUSG00000034303	0.65	0.09	-2.85244	3.53e-06	7.75e-06	Ccdc15
ENSMUSG00000034311	8.12	3.97	-1.03234	3.23e-21	1.29e-20	Kif4
ENSMUSG00000034327	16.8	7.48	-1.16735	2.1e-08	5.22e-08	Kctd9
ENSMUSG00000034329	4.05	1.15	-1.81629	4.07e-23	1.72e-22	Brip1
ENSMUSG00000034330	69.3	22.56	-1.61909	5.29e-272	2.79e-270	Plcg2
ENSMUSG00000034333	9.65	3.7	-1.383	5.68e-48	4.19e-47	Zbed4
ENSMUSG00000034342	15.81	5.01	-1.65795	3.71e-217	1.53e-215	Cbl
ENSMUSG00000034345	29.81	71	1.25202	2.75e-74	3.05e-73	Gtf2h5
ENSMUSG00000034354	18.29	4.86	-1.91203	9.23e-107	1.49e-105	Mtmr3
ENSMUSG00000034377	18.17	76.37	2.07145	0.000309953	0.000598646	Tulp4
ENSMUSG00000034382	0.9	0.22	-2.03242	1.84e-06	4.11e-06	AI661453
ENSMUSG00000034391	2.17	13.86	2.67516	9.22e-41	5.87e-40	Fbxo15
ENSMUSG00000034394	0.2	6.67	5.05961	1.65e-85	2.1e-84	Lif
ENSMUSG00000034413	4.76	1.58	-1.59104	3.2e-21	1.28e-20	Neurl1b
ENSMUSG00000034445	5.38	1.5	-1.84264	4.4e-11	1.24e-10	Cyb561a3
ENSMUSG00000034453	12.69	5.67	-1.16227	5.6e-38	3.38e-37	Polr3b
ENSMUSG00000034462	1.82	0.61	-1.57706	2.23e-09	5.83e-09	Pkd2
ENSMUSG00000034471	5.23	2.13	-1.29596	3.62e-22	1.49e-21	Caskin2
ENSMUSG00000034518	8.92	4.04	-1.14269	1.47e-15	4.98e-15	Hmgxb4
ENSMUSG00000034525	4.66	1.67	-1.48048	4.33e-33	2.34e-32	Ice1
ENSMUSG00000034543	17.49	6.93	-1.3356	3.12e-53	2.51e-52	Morc2a
ENSMUSG00000034566	245.54	607.7	1.3074	4.1e-228	1.77e-226	Atp5h
ENSMUSG00000034593	32.51	10.07	-1.69082	1.21e-67	1.21e-66	Myo5a
ENSMUSG00000034595	72.23	35.81	-1.01224	1.42e-131	2.96e-130	Ppp1r18
ENSMUSG00000034601	1.35	0.45	-1.58496	2.05e-11	5.86e-11	2700049A03Rik
ENSMUSG00000034602	8.07	2.69	-1.58496	7.03e-73	7.6e-72	Mon2
ENSMUSG00000034612	0.21	1.11	2.4021	8.22e-12	2.4e-11	Chst11
ENSMUSG00000034613	25.7	8.68	-1.566	1.96e-37	1.17e-36	Ppm1h
ENSMUSG00000034616	8.92	1.89	-2.23866	1.11e-39	6.96e-39	Ssh3
ENSMUSG00000034617	8.72	3.15	-1.46898	8.4e-30	4.19e-29	Mtrr
ENSMUSG00000034621	5.73	1.42	-2.01264	6.31e-56	5.29e-55	Gpatch8
ENSMUSG00000034636	4.28	1.55	-1.46534	5.3e-34	2.91e-33	Zyg11b
ENSMUSG00000034641	19.88	4.97	-2	9.09e-72	9.71e-71	Cd300ld
ENSMUSG00000034656	6.54	1.15	-2.50766	2.49e-75	2.8e-74	Cacna1a
ENSMUSG00000034686	0.65	2.07	1.67112	0.000477073	0.000908981	Prr7
ENSMUSG00000034707	112.43	49.05	-1.1967	1.14e-214	4.6e-213	Gns
ENSMUSG00000034714	13.87	4.67	-1.57047	8.14e-48	5.98e-47	Ttyh2
ENSMUSG00000034724	8.11	3.18	-1.35068	3.02e-08	7.45e-08	Cnot6l
ENSMUSG00000034765	2.55	20.44	3.00283	1.53e-111	2.61e-110	Dusp5
ENSMUSG00000034783	7.5	17.88	1.25338	2.52e-20	9.83e-20	Cd207
ENSMUSG00000034832	12.03	3.53	-1.7689	1.54e-113	2.67e-112	Tet3
ENSMUSG00000034848	3.12	1.52	-1.03747	2.35e-07	5.51e-07	Ttc21b
ENSMUSG00000034850	22.38	7.25	-1.62616	8.14e-83	1.01e-81	Tmem127
ENSMUSG00000034853	3.47	0.79	-2.13501	1.14e-11	3.31e-11	Acot11
ENSMUSG00000034892	210.89	543.28	1.36521	5.37e-156	1.34e-154	Rps29
ENSMUSG00000034902	136.18	49.22	-1.4682	0	0	Pip5k1c
ENSMUSG00000034908	38.84	12.79	-1.60253	1.61e-83	2e-82	Sidt2
ENSMUSG00000034917	1.99	0.63	-1.65934	7.42e-08	1.8e-07	Tjp3
ENSMUSG00000034926	53.36	17.52	-1.60676	2.33e-206	8.79e-205	Dhcr24
ENSMUSG00000034928	25.11	7.95	-1.65924	9.73e-65	9.28e-64	Rnf44
ENSMUSG00000034931	25.91	12.32	-1.07251	6.49e-53	5.2e-52	Dhx8
ENSMUSG00000034932	58.35	117.95	1.01537	2.31e-35	1.31e-34	Mrpl54
ENSMUSG00000034940	7.94	2.09	-1.92564	2.62e-33	1.42e-32	Synrg
ENSMUSG00000034947	82.81	34.75	-1.25279	6.05e-50	4.64e-49	Tmem106a
ENSMUSG00000034993	89.82	44.17	-1.02397	6.82e-108	1.12e-106	Vat1
ENSMUSG00000035011	20.39	7.36	-1.47008	2.65e-24	1.15e-23	Zbtb7a
ENSMUSG00000035024	16.28	3.35	-2.28087	4.35e-140	9.57e-139	Ncapd3
ENSMUSG00000035042	2.65	9.72	1.87496	8.34e-08	2.01e-07	Ccl5
ENSMUSG00000035048	22.06	45.11	1.03201	5.13e-11	1.44e-10	Anapc13
ENSMUSG00000035078	13.68	5.86	-1.2231	2.79e-23	1.18e-22	Mtmr9
ENSMUSG00000035125	1.87	0.82	-1.18934	0.00932491	0.0156938	Gcfc2
ENSMUSG00000035133	1.68	0.42	-2	2.96e-13	9.15e-13	Arhgap5
ENSMUSG00000035152	45.57	21.16	-1.10674	3.19e-73	3.49e-72	Ap2b1
ENSMUSG00000035168	3.29	1.55	-1.08582	4.21e-37	2.49e-36	Tanc1
ENSMUSG00000035172	3.76	1.56	-1.26919	1.39e-09	3.66e-09	Plekhh3
ENSMUSG00000035173	1.41	0.55	-1.35819	9.82e-07	2.23e-06	Ccdc186
ENSMUSG00000035181	9.77	3.83	-1.35101	6.49e-58	5.64e-57	Heatr5a
ENSMUSG00000035203	64.87	29.53	-1.13537	1.92e-81	2.33e-80	Epn1
ENSMUSG00000035215	20.49	85.87	2.06723	1.72e-58	1.51e-57	Lsm7
ENSMUSG00000035245	5.28	1.15	-2.1989	1.22e-21	4.93e-21	Eogt
ENSMUSG00000035247	5.86	2.82	-1.05521	1.31e-28	6.34e-28	Hectd1
ENSMUSG00000035248	3.83	0.82	-2.22365	5.36e-35	3.01e-34	Zcchc6
ENSMUSG00000035274	0.001	0.41	8.67948	3.85e-06	8.42e-06	Tpbg
ENSMUSG00000035279	4.52	1.31	-1.78676	7.53e-23	3.15e-22	Ssc5d
ENSMUSG00000035284	9.36	1.25	-2.90458	5.3e-219	2.21e-217	Vps13c
ENSMUSG00000035293	3.44	1.41	-1.28671	3e-10	8.17e-10	G2e3
ENSMUSG00000035299	1.44	0.49	-1.55522	2.65e-05	5.52e-05	Mid1
ENSMUSG00000035311	90.72	25.43	-1.83489	0	0	Gnptab
ENSMUSG00000035314	16.26	2.98	-2.44794	5.94e-90	8.05e-89	Gdpd5
ENSMUSG00000035354	8.74	3.15	-1.47228	3.6e-52	2.86e-51	Uvrag
ENSMUSG00000035356	1.44	14.15	3.29666	3.83e-109	6.4e-108	Nfkbiz
ENSMUSG00000035365	7.46	3.71	-1.00776	7.46e-05	0.00015076	Parpbp
ENSMUSG00000035372	19.43	8.48	-1.19615	6.17e-25	2.74e-24	1810055G02Rik
ENSMUSG00000035373	0.19	1.8	3.24393	0.000222778	0.000435066	Ccl7
ENSMUSG00000035382	16.21	7.01	-1.2094	2.33e-40	1.48e-39	Pcsk7
ENSMUSG00000035385	8.39	29.48	1.81299	1.45e-30	7.35e-30	Ccl2
ENSMUSG00000035392	7.71	1.21	-2.67172	3.27e-56	2.76e-55	Dennd1a
ENSMUSG00000035401	2.71	1.19	-1.18733	0.000207581	0.00040653	Emsy
ENSMUSG00000035437	5.68	2.25	-1.33597	8.13e-14	2.57e-13	Rabgap1
ENSMUSG00000035441	37.48	10.92	-1.77915	1.21e-206	4.57e-205	Myo1d
ENSMUSG00000035458	0.33	2.3	2.8011	0.000181736	0.000357713	Tnni3
ENSMUSG00000035493	1.47	0.31	-2.24548	1.74e-07	4.13e-07	Tgfbi
ENSMUSG00000035495	19.18	6.3	-1.60618	1.22e-29	6.07e-29	Tstd2
ENSMUSG00000035504	10.45	5.04	-1.05201	4.27e-13	1.32e-12	Reep6
ENSMUSG00000035530	220.54	496.35	1.17032	6.36e-285	3.61e-283	Eif1
ENSMUSG00000035545	29.28	6.61	-2.14719	3.25e-94	4.6e-93	Leng8
ENSMUSG00000035547	8.18	1.54	-2.40917	1.84e-48	1.37e-47	Capn5
ENSMUSG00000035569	11.28	4.01	-1.49209	1.9e-79	2.24e-78	Ankrd11
ENSMUSG00000035595	9.19	28.15	1.615	5.47e-21	2.17e-20	1600002K03Rik
ENSMUSG00000035621	30.42	10.51	-1.53326	1.12e-88	1.49e-87	Midn
ENSMUSG00000035629	7.6	2.96	-1.3604	5.65e-49	4.25e-48	Rubcn
ENSMUSG00000035642	2.2	5.64	1.35819	0.00343053	0.00604968	Aamdc
ENSMUSG00000035666	21.17	5.91	-1.84079	1.39e-66	1.36e-65	Gtf3c4
ENSMUSG00000035671	13.68	5.54	-1.30411	3.14e-44	2.16e-43	Zswim4
ENSMUSG00000035673	32.77	8.31	-1.97946	1.61e-173	4.64e-172	Sbno2
ENSMUSG00000035674	24.81	52.06	1.06925	9.68e-14	3.05e-13	Ndufa3
ENSMUSG00000035692	15.89	49.88	1.65034	6.81e-41	4.36e-40	Isg15
ENSMUSG00000035696	13.36	3.09	-2.11224	1.1e-28	5.35e-28	Rnf38
ENSMUSG00000035697	93.99	18.49	-2.34576	0	0	Hmha1
ENSMUSG00000035722	14.84	4.61	-1.68665	1.93e-103	3.04e-102	Abca7
ENSMUSG00000035735	0.66	0.07	-3.23704	2.24e-10	6.14e-10	Dagla
ENSMUSG00000035765	19.12	7.69	-1.31403	4.06e-36	2.34e-35	Dym
ENSMUSG00000035769	5.96	2.19	-1.44438	2.1e-21	8.43e-21	Xylb
ENSMUSG00000035778	10.18	4.44	-1.19711	4.68e-19	1.77e-18	Ggta1
ENSMUSG00000035783	0.42	1.11	1.4021	0.0114032	0.0190166	Acta2
ENSMUSG00000035790	2.98	6.59	1.14497	1.04e-05	2.22e-05	Cep19
ENSMUSG00000035829	2.4	0.81	-1.56704	1.62e-11	4.65e-11	Ppp1r26
ENSMUSG00000035834	5.02	14.73	1.553	4.49e-12	1.33e-11	Polr3g
ENSMUSG00000035835	1.14	0.05	-4.51096	8.77e-12	2.56e-11	Plppr3
ENSMUSG00000035842	9.72	3.15	-1.6256	2.08e-42	1.37e-41	Ddx11
ENSMUSG00000035877	5.27	1.4	-1.91238	6.99e-22	2.84e-21	Zhx3
ENSMUSG00000035891	22.77	7.35	-1.63132	1.12e-105	1.79e-104	Cerk
ENSMUSG00000035900	9.55	3	-1.67054	5.78e-44	3.96e-43	Gramd4
ENSMUSG00000035914	115.11	56.62	-1.02363	2.06e-154	5.08e-153	Cd276
ENSMUSG00000035919	11.46	30.05	1.39076	2.99e-29	1.48e-28	Bbs9
ENSMUSG00000035933	5.69	1.57	-1.85766	8.12e-23	3.39e-22	Cog5
ENSMUSG00000035944	1.07	0.46	-1.21791	1.98e-05	4.15e-05	Ttc38
ENSMUSG00000035954	1.34	0.53	-1.33817	8.64e-10	2.3e-09	Dock4
ENSMUSG00000035969	16.99	5.97	-1.50888	4.78e-37	2.82e-36	Rusc2
ENSMUSG00000036022	1.88	0.87	-1.11165	1.44e-05	3.04e-05	Fam122b
ENSMUSG00000036030	1.55	0.56	-1.46877	3.35e-14	1.08e-13	Prtg
ENSMUSG00000036061	3.44	1.62	-1.08641	1.34e-07	3.19e-07	Smug1
ENSMUSG00000036067	31.41	15.41	-1.02736	1.34e-34	7.48e-34	Slc2a6
ENSMUSG00000036086	1.83	0.67	-1.44961	3.03e-10	8.25e-10	Zranb3
ENSMUSG00000036087	26.43	11.33	-1.22203	3.79e-15	1.26e-14	Slain2
ENSMUSG00000036097	3.55	1.24	-1.51748	2.95e-24	1.28e-23	Fam178a
ENSMUSG00000036103	77.29	38.52	-1.00467	3.88e-107	6.31e-106	Colec12
ENSMUSG00000036155	11.03	3.22	-1.7763	6.73e-85	8.51e-84	Mgat5
ENSMUSG00000036180	32.17	13.81	-1.22	8.03e-107	1.3e-105	Gatad2a
ENSMUSG00000036199	27.3	72.67	1.41246	3.39e-73	3.71e-72	Ndufa13
ENSMUSG00000036225	0.39	0.09	-2.11548	0.00436394	0.00760891	Kctd1
ENSMUSG00000036246	37.26	12.74	-1.54826	2.28e-166	6.15e-165	Gmip
ENSMUSG00000036270	28.83	9.53	-1.59702	1.21e-72	1.31e-71	Edc4
ENSMUSG00000036299	44.13	92.3	1.06457	5.4e-50	4.14e-49	BC031181
ENSMUSG00000036304	0.4	0.001	-8.64386	0.0156414	0.0256236	Zdhhc23
ENSMUSG00000036315	28.49	70.59	1.30901	4.82e-38	2.91e-37	Znrd1
ENSMUSG00000036323	40.76	19.67	-1.05116	4.62e-59	4.1e-58	Srp72
ENSMUSG00000036333	7.38	2.77	-1.41373	7.08e-46	5.05e-45	Kidins220
ENSMUSG00000036339	4.1	1.36	-1.59202	4.62e-18	1.69e-17	Tmem260
ENSMUSG00000036390	0.79	7.9	3.32193	8.73e-25	3.85e-24	Gadd45a
ENSMUSG00000036391	6.1	2.89	-1.07774	1.47e-08	3.7e-08	Sec24a
ENSMUSG00000036398	59.94	124.52	1.05479	6.6e-50	5.05e-49	Ppp1r11
ENSMUSG00000036403	1.63	0.71	-1.19898	4.24e-07	9.83e-07	Cep135
ENSMUSG00000036411	0.21	0.001	-7.71425	0.0312734	0.0491597	9530077C05Rik
ENSMUSG00000036450	9.28	4.59	-1.01563	4.15e-29	2.04e-28	Hif1an
ENSMUSG00000036452	1.54	0.62	-1.31259	3.98e-06	8.71e-06	Arhgap26
ENSMUSG00000036473	4.59	0.91	-2.33456	3.19e-26	1.46e-25	Tbc1d24
ENSMUSG00000036478	19.14	66.51	1.79698	0	0	Btg1
ENSMUSG00000036504	16.84	38.92	1.20862	8.1e-25	3.58e-24	Phpt1
ENSMUSG00000036534	18.36	6.32	-1.53857	1.77e-47	1.29e-46	Slc38a7
ENSMUSG00000036537	2.97	6.34	1.09402	9.66e-06	2.06e-05	Rnf113a1
ENSMUSG00000036550	21.8	4.92	-2.1476	7.18e-246	3.39e-244	Cnot1
ENSMUSG00000036555	8.33	3.23	-1.36678	1.11e-16	3.89e-16	Iqce
ENSMUSG00000036561	5.55	1.53	-1.85896	1.47e-21	5.9e-21	Ppp6r2
ENSMUSG00000036565	26.01	5.05	-2.36471	4.31e-182	1.33e-180	Ttyh3
ENSMUSG00000036568	3.3	0.88	-1.90689	2.48e-29	1.23e-28	Gltscr1l
ENSMUSG00000036591	7.04	1.44	-2.28951	2.99e-63	2.81e-62	Arhgap21
ENSMUSG00000036611	12.4	6.17	-1.007	2.05e-16	7.14e-16	Eepd1
ENSMUSG00000036615	7.09	16.24	1.19569	0.0012187	0.00224078	-
ENSMUSG00000036644	20.54	4.69	-2.13078	5.22e-91	7.15e-90	Tbc1d9b
ENSMUSG00000036646	28.26	11.2	-1.33526	1.86e-77	2.15e-76	Man1b1
ENSMUSG00000036661	2.11	0.54	-1.96621	1.28e-16	4.48e-16	Dennd3
ENSMUSG00000036667	1.88	0.71	-1.40484	0.00229749	0.00412556	Tcaf1
ENSMUSG00000036676	3.47	1.26	-1.46151	5.33e-09	1.37e-08	Tmtc3
ENSMUSG00000036686	18.53	6.18	-1.58418	3.71e-63	3.47e-62	Cc2d1a
ENSMUSG00000036698	15.04	4.21	-1.83691	1.36e-221	5.75e-220	Ago2
ENSMUSG00000036751	197.35	430.06	1.12378	4.19e-135	8.93e-134	Cox6b1
ENSMUSG00000036775	4.51	1.49	-1.59782	2.5e-11	7.13e-11	Decr2
ENSMUSG00000036777	22.35	10.93	-1.03198	5.9e-58	5.14e-57	Anln
ENSMUSG00000036817	50.56	18.84	-1.4242	8.25e-99	1.24e-97	Sun1
ENSMUSG00000036826	0.001	1.04	10.0224	3.07e-05	6.36e-05	Igflr1
ENSMUSG00000036833	26.12	13.01	-1.00553	1.52e-91	2.09e-90	Pnpla7
ENSMUSG00000036835	98.14	223.13	1.18497	1.02e-95	1.48e-94	Psenen
ENSMUSG00000036850	41.19	82.99	1.01064	5.75e-32	3.03e-31	Mrpl41
ENSMUSG00000036854	6.49	1.08	-2.58719	2.61e-17	9.34e-17	Hspb6
ENSMUSG00000036862	1.16	0.1	-3.53605	7.07e-33	3.8e-32	Dchs1
ENSMUSG00000036864	1.82	0.57	-1.6749	2.65e-05	5.52e-05	Proser3
ENSMUSG00000036867	5.74	1.38	-2.05638	7.1e-26	3.22e-25	Smad6
ENSMUSG00000036882	1.81	0.21	-3.10753	6.34e-10	1.7e-09	Arhgap33
ENSMUSG00000036893	12.76	5.34	-1.25672	4.41e-46	3.15e-45	Ehmt1
ENSMUSG00000036918	55.25	23.42	-1.23823	0	0	Ttc7
ENSMUSG00000036934	2.42	5.58	1.20526	3.03e-07	7.08e-07	4921524J17Rik
ENSMUSG00000036948	11.16	3.87	-1.52793	3.08e-27	1.44e-26	-
ENSMUSG00000036959	1.37	0.61	-1.16729	2.48e-07	5.83e-07	Bcorl1
ENSMUSG00000036980	49.45	12.67	-1.96455	2.42e-80	2.89e-79	Taf6
ENSMUSG00000036985	17.4	7.37	-1.23935	4.45e-32	2.35e-31	Zdhhc9
ENSMUSG00000036986	14.97	4.04	-1.88965	4.16e-95	5.99e-94	Pml
ENSMUSG00000037003	0.8	0.11	-2.8625	2.52e-09	6.57e-09	Tns2
ENSMUSG00000037012	104.29	34.75	-1.58552	0	0	Hk1
ENSMUSG00000037020	8.99	3.48	-1.36923	5.69e-73	6.17e-72	Wdr62
ENSMUSG00000037110	1.5	0.29	-2.37084	6.34e-11	1.78e-10	Ralgapa2
ENSMUSG00000037111	6.98	2.12	-1.71916	1.23e-57	1.06e-56	Setd7
ENSMUSG00000037112	12.04	1.03	-3.54712	7.14e-54	5.83e-53	Sik2
ENSMUSG00000037151	10.45	1.54	-2.7625	8.92e-57	7.6e-56	Lrrc20
ENSMUSG00000037152	42.24	104.76	1.31041	1.14e-36	6.67e-36	Ndufc1
ENSMUSG00000037169	262.53	118.81	-1.14383	2.38e-270	1.25e-268	Mycn
ENSMUSG00000037174	20.7	8.94	-1.21128	2.71e-25	1.21e-24	Elf2
ENSMUSG00000037210	8.36	2.56	-1.70736	1.12e-36	6.54e-36	Fam193a
ENSMUSG00000037235	7.76	3.7	-1.06853	6.77e-32	3.56e-31	Mxd4
ENSMUSG00000037242	321.06	140.08	-1.19659	0	0	Clic4
ENSMUSG00000037275	16.89	5.24	-1.68853	4.42e-87	5.76e-86	Gemin5
ENSMUSG00000037287	7.17	3.21	-1.1594	5.37e-12	1.59e-11	Tbcel
ENSMUSG00000037295	52.19	19.26	-1.43817	4.9e-22	2e-21	Ldlrap1
ENSMUSG00000037306	21.12	5.75	-1.87698	1.88e-129	3.85e-128	Man1c1
ENSMUSG00000037315	3.1	1.47	-1.07645	2.27e-09	5.93e-09	Jade3
ENSMUSG00000037325	2.43	0.97	-1.3249	0.0098304	0.0164975	Bbs7
ENSMUSG00000037326	7.44	0.54	-3.78427	1.69e-72	1.82e-71	Capn15
ENSMUSG00000037349	24.79	56.53	1.18926	6.51e-37	3.82e-36	Nudt22
ENSMUSG00000037355	0.73	0.24	-1.60486	9e-05	0.000180947	Uvssa
ENSMUSG00000037366	3.6	1.67	-1.10815	5.26e-06	1.14e-05	Pafah2
ENSMUSG00000037395	3.77	1.56	-1.27302	2.56e-07	6.01e-07	Rcor3
ENSMUSG00000037408	7.6	2.47	-1.62149	2.12e-36	1.23e-35	Cnnm4
ENSMUSG00000037410	9.97	3.24	-1.6216	2.06e-60	1.86e-59	Tbc1d2b
ENSMUSG00000037415	10.12	2.54	-1.99431	4e-73	4.35e-72	Ranbp10
ENSMUSG00000037416	1.98	0.91	-1.12156	2.5e-13	7.76e-13	Dmxl1
ENSMUSG00000037419	33.43	15.75	-1.08579	1.53e-78	1.78e-77	Endod1
ENSMUSG00000037426	22.01	3.26	-2.75522	2.77e-92	3.84e-91	Depdc5
ENSMUSG00000037428	0.65	2.03	1.64297	7.62e-11	2.13e-10	Vgf
ENSMUSG00000037434	5.09	12.38	1.28227	8.03e-47	5.81e-46	Slc30a1
[truncated: 1,385 more rows]
